# Supplementary material for: Mebendazole for Differentiation Therapy of Acute Myeloid Leukemia Identified by a Lineage Maturation Index
Source: PubMed Central journal article supplement (PMC6856101; doi:10.1038/s41598-019-53290-3), 2019-11-14
Supplement: 41598_2019_53290_MOESM1_ESM.pdf [file 41598_2019_53290_MOESM1_ESM.pdf]

## Supplementary Information:

### **Mebendazole for Differentiation Therapy of Acute Myeloid Leukemia Identified by a Lineage Maturation Index**

Yulin Li<sup>1, 2, 3 \*</sup>, Daniel Thomas<sup>4</sup>, Anja Deutzmann<sup>3</sup>, Ravindra Majeti<sup>4</sup>, Dean W. Felsher<sup>3</sup>,  
David L. Dill<sup>5</sup>

<sup>1</sup>Center for Immunotherapy Research, Houston Methodist Research Institute, Houston, TX 77030; <sup>2</sup>Department of Medicine, Weill Cornell Medical College, New York, NY 10065; <sup>3</sup>Division of Oncology, Department of Medicine and Pathology, Stanford University School of Medicine; <sup>4</sup>Division of Hematology, Department of Medicine, and Institute for Stem Cell Biology and Regenerative Medicine, Stanford University School of Medicine; <sup>5</sup>Department of Computer Science, Stanford University, Stanford, CA 94305, USA.

\* **Corresponding author:** Yulin Li, Houston Methodist Research Institute. 6670 Bertner Avenue. Houston, TX 77030. Phone: 713-441-7350; Fax: 713-441-7438; Email: [yli@houstonmethodist.org](mailto:yli@houstonmethodist.org)

The supplemental information includes:  
**Supplementary Figure S1-S4.**  
**Supplementary Table S1-S2.**

## Supplementary Fig S1

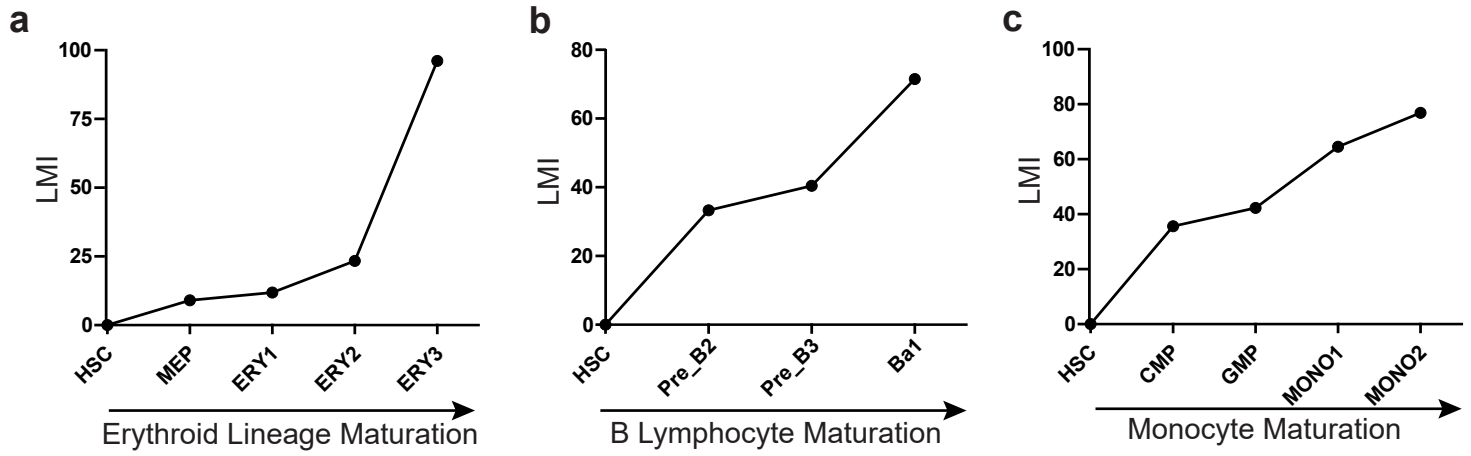

**LMI can differentiate among various intermediate populations within normal human hematopoietic system.** (a) human erythroid lineage. (b) human B lymphocyte lineage. (c) human monocytic lineage.

## Supplementary Fig S2

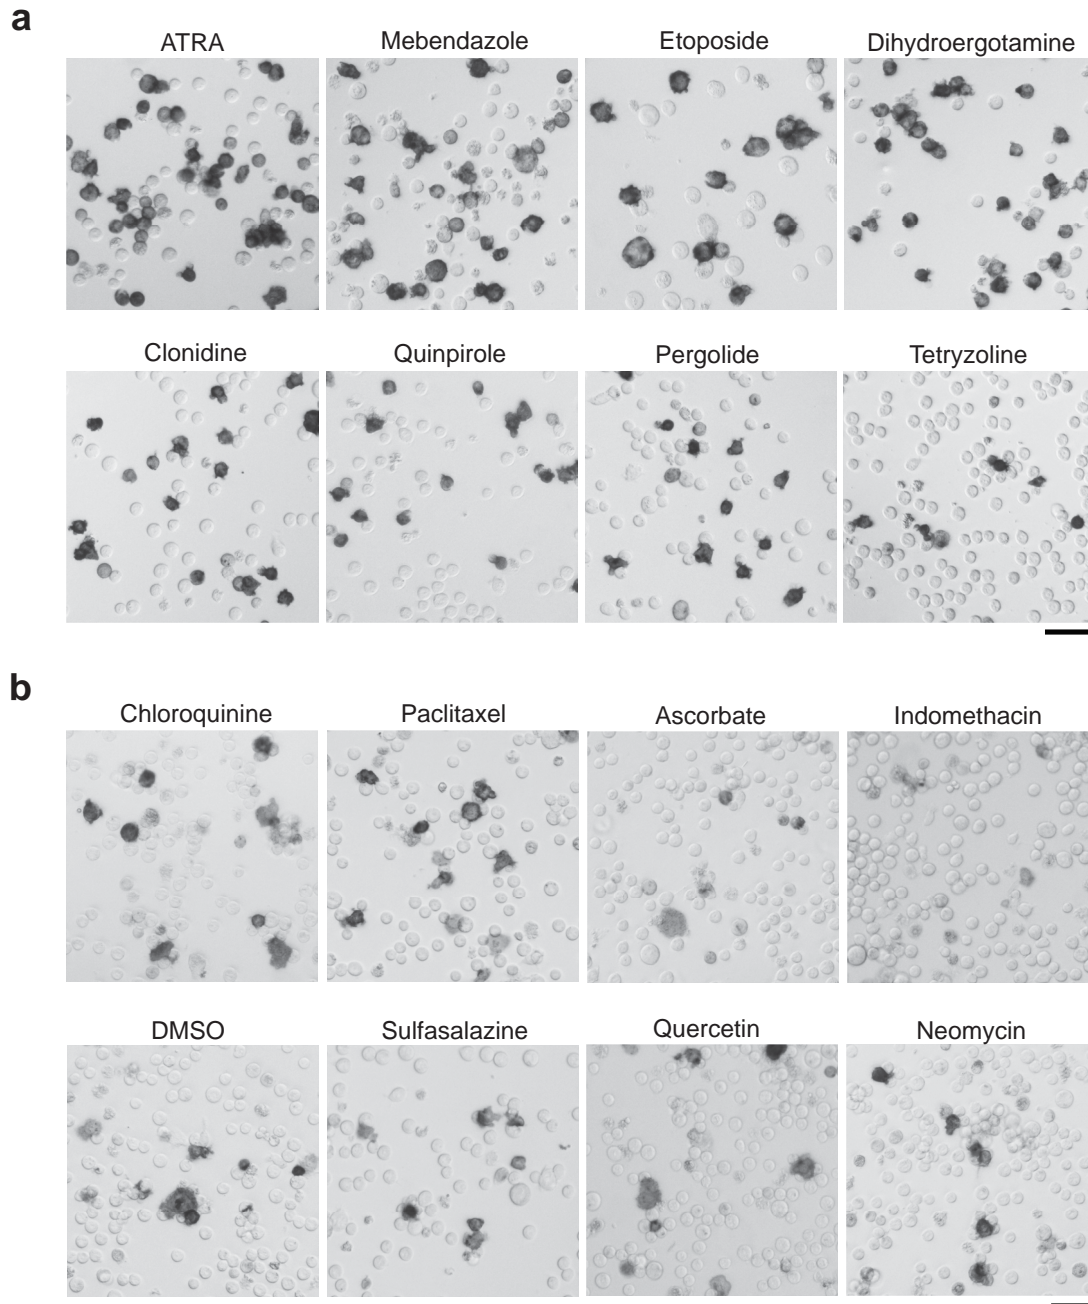

NBT staining of HL-60 leukemia cells treated with C-MAP drugs. (a) Treatments with drugs that have high LMI increases. (b) Treatments with drugs that are randomly chosen from the C-MAP drug library. ATRA, etoposide, and mebendazole were used at 1 $\mu$ M. Paclitaxel was used at 0.1 $\mu$ M. All other drugs were used at 10 $\mu$ M. Scale bar is 50  $\mu$ m.

**Supplementary Fig S3**

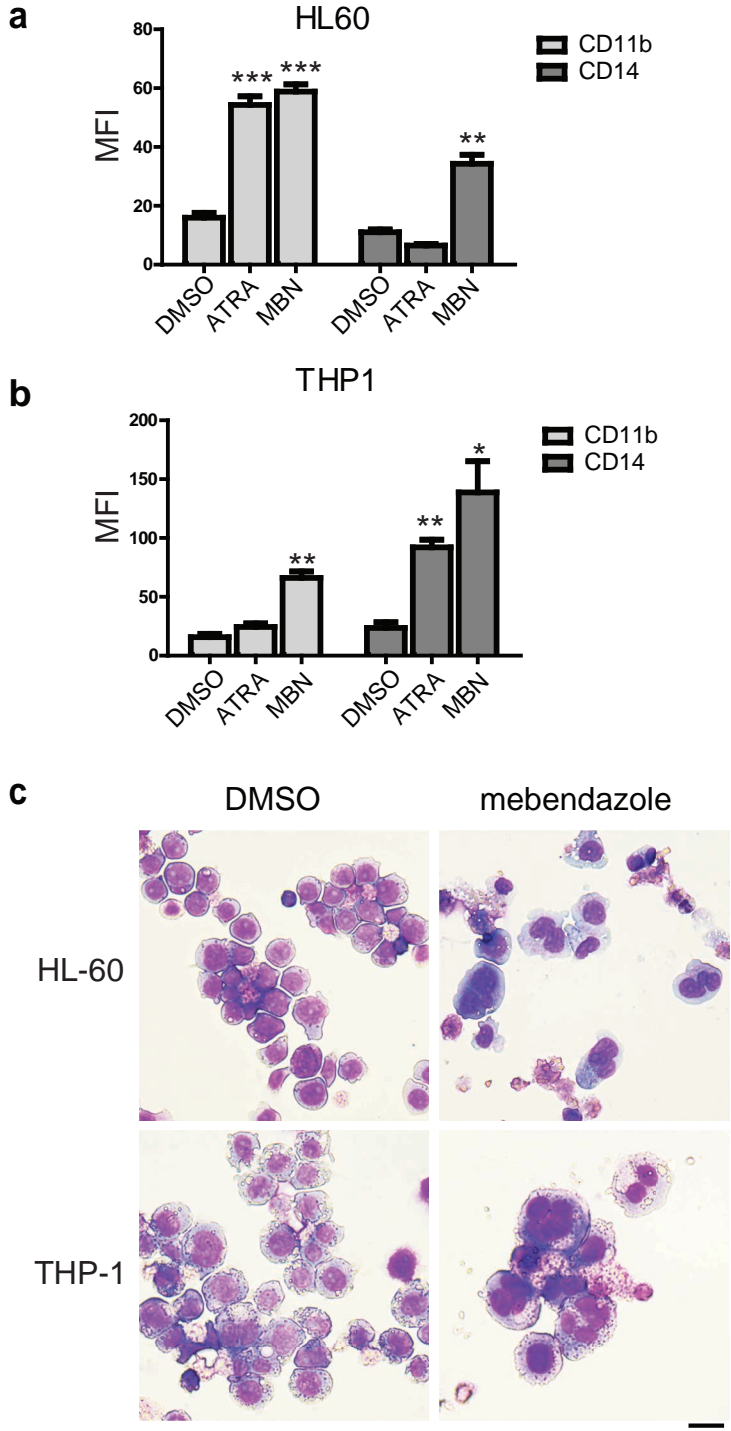

**Differentiation upon mebendazole treatment in HL-60 and THP-1 cells.** (a-b) Mean fluorescence intensity (MFI) of CD11b and CD14 expression in HL-60 and THP-1 leukemia cells treated with ATRA (1 $\mu$ M) and mebendazole (MBN) (0.33 $\mu$ M) for four days. \*, \*\*, and \*\*\* indicate Student's t test p value of less than 0.05., 0.01, and 0.001, respectively. (c) Morphology of HL-60 and THP-1 cells treated with mebendazole as shown by Wright's staining. Scale bar is 25  $\mu$ m.

Supplementary Fig S4

a

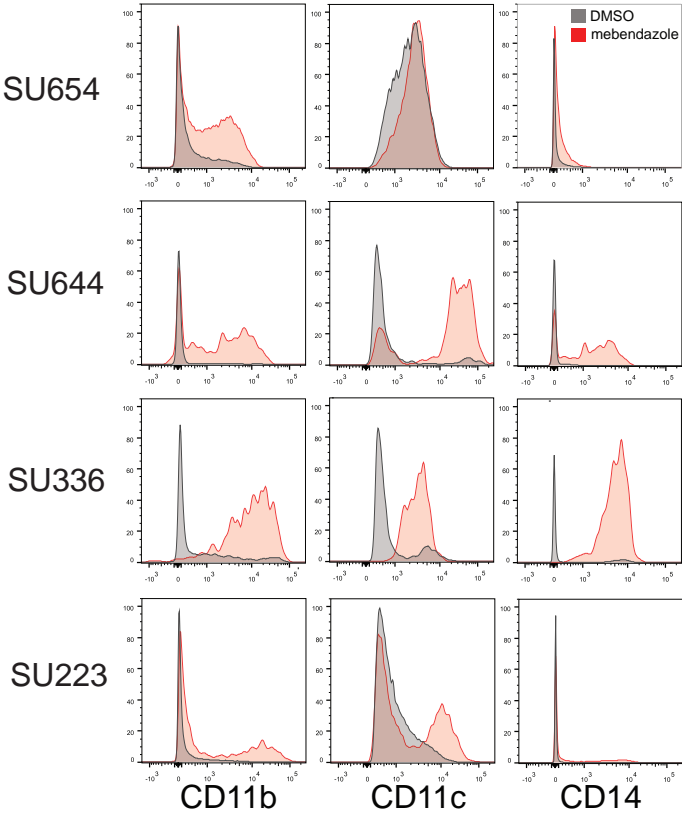

b

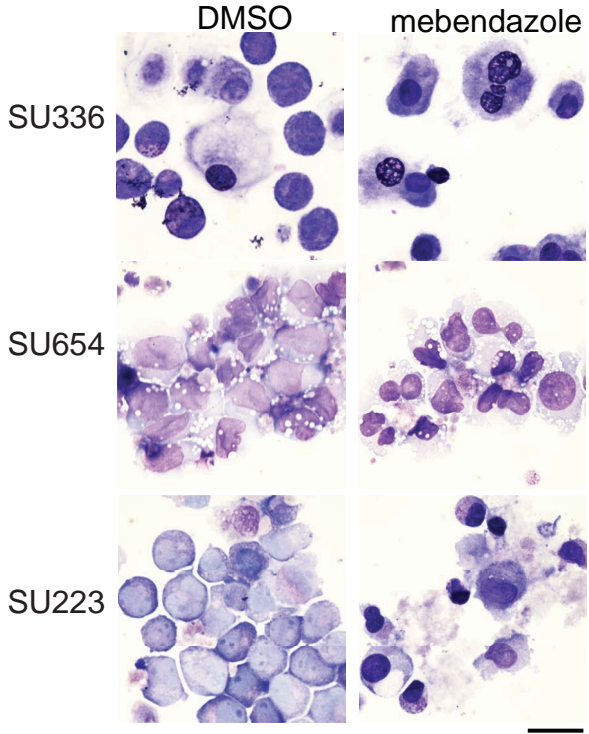

**Differentiation upon mebendazole treatment in primary AML blasts from patients.** (a) Flow cytometric analysis of CD11b, CD11c, and CD14 expression in primary AML samples treated with mebendazole. (b) Morphological changes of primary AML leukemic cells treated with mebendazole as shown by Wright's staining. Scale bar is 20um.

**Supplementary Table S1. LMIs of the drugs from GE-HTS project.**

| Treatment | Array 1 | Array 2 | Array 3 | Array 4 | Array 5 | Array 6 | P value |
|-----------|---------|---------|---------|---------|---------|---------|---------|
| Undiff    | 33.8    | 33.8    | 33.3    | 34.4    | 34.8    | 34.7    | 0.143   |
| DMSO      | 33.6    | 33.9    | 34.5    | 36.5    | 36      | 35.4    | 1.000   |
| Erythro   | 37.2    | 38.2    | 39.7    |         |         |         | 0.005   |
| Methyl    | 33.6    | 33.4    | 33.5    |         |         |         | 0.072   |
| Sulma     | 33.4    | 34      | 33.6    |         |         |         | 0.105   |
| Keto      | 37.3    | 37.4    | 35.8    |         |         |         | 0.049   |
| EGFR      | 38.6    | 38.1    | 36.7    |         |         |         | 0.009   |
| Phen      | 36.4    | 37      | 39.3    |         |         |         | 0.025   |
| 5FUD      | 37.8    | 36.7    | 37.1    |         |         |         | 0.019   |
| Perg      | 38.2    | 37.7    | 37.6    |         |         |         | 0.005   |
| Scop      | 35.2    | 35      | 34.9    |         |         |         | 0.945   |
| 5FU       | 34.1    | 34.6    | 34.9    |         |         |         | 0.549   |
| Caff      | 35.1    | 34.9    | 34.9    |         |         |         | 0.982   |
| Apo       | 38.4    | 39.6    | 38.4    |         |         |         | 0.001   |
| Cyc       | 36.1    | 36.2    | 35.9    |         |         |         | 0.166   |
|           |         |         |         |         |         |         |         |
| VitD      | 46.7    | 47.3    | 47.3    |         |         |         | 0.000   |
| PMA       | 40.8    | 39.9    | 40.2    |         |         |         | 0.000   |
| ATRA      | 39.2    | 40.3    | 39.5    |         |         |         | 0.000   |

**Note:**

All treatments were compared to DMSO using Student's t test.

Results of the t tests were plotted in Figure 2C.

VitD, PMA and ATRA were the positive controls.

Drugs reported to have differentiation activity in the GE-HTS project were highlighted in red.

Cyc (cyclazosin) treatment did not show a statistically significant increase in LMIs.

**Supplementary Table S2. LMI of 1235 arrays for the HL-60 C-MAP drug treatments**

| Drug Name             | LMIs of Drugs | LMIs of DMSO cont | LMI Shifts  | perturbation_scan_id      | vehicle_scan_id4         |
|-----------------------|---------------|-------------------|-------------|---------------------------|--------------------------|
| pergolide             | 37.61878802   | 33.00109826       | 4.617689757 | 5500024024213121906560.B  | .H07.G08.E09.D10.B11.A12 |
| mebendazole           | 38.07285774   | 33.45935203       | 4.613505706 | 5500024024213121906560.G  | .H01.G02.E03.D04.B05.A06 |
| emetine               | 39.23596421   | 35.01997127       | 4.215992936 | 5.50E+25                  | .H01.G02.E03.D04.B05.A06 |
| etoposide             | 37.04604708   | 33.45797002       | 3.58807706  | 622623112706.A10          | .H07.G08.E09.D10.B11.A12 |
| cephaeline            | 38.55816628   | 35.15552717       | 3.402639109 | 5500024024214122006604.G  | .H01.G02.E03.D04.A06     |
| methylergometrine     | 36.54416434   | 33.45797002       | 3.086194328 | 622623112706.D07          | .H07.G08.E09.D10.B11.A12 |
| dihydroergotamine     | 37.82977533   | 34.74789333       | 3.081882002 | 614615111406.B04          | .H01.G02.E03.D04.B05.A06 |
| tetryzoline           | 37.03346312   | 33.96076648       | 3.072696644 | 5500024025833041107269.H  | .H01.G02.E03.D04.B05.A06 |
| clonidine             | 36.50844166   | 33.4530122        | 3.055429454 | 622623112706.G06          | .H01.G02.E03.B05.A06     |
| (-)-isoprenaline      | 40.24499304   | 37.24787327       | 2.997119765 | 5500024035736031208612.C  | .H01.G02.E03.D04.B05.A06 |
| retinoin              | 40.27693543   | 37.31290545       | 2.964029982 | 5500024035736031208612.G  | .G08.E09.D10.B11.A12     |
| quinpirole            | 37.07850086   | 34.17633596       | 2.9021649   | 5500024030760072207033.A  | .H07.G08.E09.B11.A12     |
| retinoin              | 39.00594942   | 36.14209273       | 2.863856694 | 5500024017802120306174.G  | .H01.G02.E03.D04.B05.A06 |
| retinoin              | 37.25512615   | 34.42118584       | 2.833940317 | 5500024030401071707292.G  | .H01.G02.E03.D04.B05.A06 |
| bromocriptine         | 38.21125473   | 35.4281341        | 2.783120629 | 612613111306.H10          | .H07.G08.E09.D10.B11.A12 |
| fenoterol             | 35.76007621   | 33.00109826       | 2.758977951 | 5500024024213121906560.G  | .H07.G08.E09.D10.B11.A12 |
| isotretinoin          | 35.75633787   | 33.00109826       | 2.755239602 | 5500024024213121906560.B  | .H07.G08.E09.D10.B11.A12 |
| cicloheximide         | 37.15489975   | 34.40088765       | 2.754012101 | 5.50E+33                  | .H07.G08.E09.D10.B11     |
| podophyllotoxin       | 36.59543193   | 33.96076648       | 2.634665452 | 5500024025833041107269.A  | .H01.G02.E03.D04.B05.A06 |
| co-dergocrine mesilat | 37.63427517   | 35.01997127       | 2.6143039   | 5500024024213121906559.G  | .H01.G02.E03.D04.B05.A06 |
| retinoin              | 35.93951186   | 33.4530122        | 2.486499662 | 622623112706.H04          | .H01.G02.E03.B05.A06     |
| menadione             | 37.62249204   | 35.15552717       | 2.466964871 | 5.50E+25                  | .H01.G02.E03.D04.A06     |
| alprostadil           | 37.12019437   | 34.70962788       | 2.410566484 | 5500024030760072207033.A  | .H01.G02.E03.D04.B05.A06 |
| corbadrine            | 36.70730928   | 34.40088765       | 2.306421632 | 5500024030401071707292.G  | .H07.G08.E09.D10.B11     |
| picrotoxinin          | 37.3181547    | 35.01997127       | 2.298183431 | 5500024024213121906559.B  | .H01.G02.E03.D04.B05.A06 |
| mephentermine         | 36.2033931    | 33.96129529       | 2.242097807 | 5500024025833041107269.D  | .H07.E09.D10.B11.A12     |
| salbutamol            | 35.68992145   | 33.45935203       | 2.230569424 | 5500024024213121906560.FI | .H01.G02.E03.D04.B05.A06 |
| niclosamide           | 37.47162574   | 35.2669347        | 2.204691037 | 612613111306.B04          | .H01.G02.E03.D04.B05.A06 |
| isoetarine            | 36.47392415   | 34.40088765       | 2.073036503 | 5500024030401071707292.G  | .H07.G08.E09.D10.B11     |
| medrysone             | 36.00088244   | 33.96129529       | 2.039587153 | 5500024025833041107269.H  | .H07.E09.D10.B11.A12     |
| clenbuterol           | 35.48204703   | 33.45797002       | 2.024077013 | 622623112706.C08          | .H07.G08.E09.D10.B11.A12 |
| (+)-isoprenaline      | 36.23280246   | 34.21031976       | 2.022482701 | 5500024030760072207028.D  | .H07.G08.E09.D10.B11.A12 |
| metoprolol            | 35.90485872   | 33.96076648       | 1.944092245 | 5500024025833041107269.A  | .H01.G02.E03.D04.B05.A06 |
| thioridazine          | 38.06162041   | 36.14209273       | 1.919527677 | 5500024017802120306174.C  | .H01.G02.E03.D04.B05.A06 |
| pivampicillin         | 36.08538825   | 34.17633596       | 1.909052296 | 5500024030760072207033.H  | .H07.G08.E09.B11.A12     |
| iopanoic acid         | 36.03645394   | 34.17633596       | 1.860117984 | 5500024030760072207033.D  | .H07.G08.E09.B11.A12     |
| nimodipine            | 39.03814807   | 37.24471367       | 1.793434395 | 5500024030700072107987.A  | .H01.G02.E03.D04.B05.A06 |
| colchicine            | 35.24285004   | 33.45797002       | 1.784880028 | 622623112706.F09          | .H07.G08.E09.D10.B11.A12 |
| nocodazole            | 36.5178268    | 34.74789333       | 1.769933477 | 614615111406.C05          | .H01.G02.E03.D04.B05.A06 |
| pyrvinium             | 35.94053312   | 34.17633596       | 1.764197167 | 5500024030760072207033.F  | .H07.G08.E09.B11.A12     |
| dinoprost             | 36.89645834   | 35.15552717       | 1.740931174 | 5500024024214122006604.C  | .H01.G02.E03.D04.A06     |
| levonorgestrel        | 35.70091065   | 33.96129529       | 1.739615358 | 5500024025833041107269.H  | .H07.E09.D10.B11.A12     |
| trichostatin A        | 36.67804214   | 34.94387722       | 1.734164918 | EC2004030506AA            | EC2004030502AA           |
| Prestwick-983         | 39.16936879   | 37.46016387       | 1.709204926 | 5500024030700072107987.B  | .H07.G08.E09.D10.B11.A12 |
| ipratropium bromide   | 36.76906708   | 35.08636713       | 1.682699952 | 6.41E+22                  | .H07.G08.E09.D10.B11.A12 |
| puromycin             | 36.82046358   | 35.15552717       | 1.664936412 | 5500024024214122006604.C  | .H01.G02.E03.D04.A06     |
| thioridazine          | 38.94278027   | 37.31290545       | 1.629874814 | 5500024035736031208612.C  | .G08.E09.D10.B11.A12     |
| alpha-ergocryptine    | 35.5751487    | 33.96129529       | 1.613853414 | 5500024025833041107269.C  | .H07.E09.D10.B11.A12     |
| zardaverine           | 36.30579708   | 34.70962788       | 1.596169204 | 5500024030760072207033.C  | .H01.G02.E03.D04.B05.A06 |
| orciprenaline         | 36.72274614   | 35.13162255       | 1.591123588 | 5500024024214122006604.D  | .H07.G08.E09.D10.B11.A12 |
| vigabatrin            | 36.7285016    | 35.15552717       | 1.57297443  | 5500024024214122006604.B  | .H01.G02.E03.D04.A06     |
| genistein             | 37.6908361    | 36.14209273       | 1.548743373 | 5500024017802120306174.B  | .H01.G02.E03.D04.B05.A06 |
| labetalol             | 34.98443078   | 33.4530122        | 1.531418579 | 622623112706.H06          | .H01.G02.E03.B05.A06     |
| nadide                | 35.44293943   | 33.96076648       | 1.482172953 | 5500024025833041107269.C  | .H01.G02.E03.D04.B05.A06 |
| betazole              | 39.08816571   | 37.63864853       | 1.449517186 | 5500024024213121906564.D  | .H07.G08.D10.B11.A12     |
| probutol              | 34.89271771   | 33.45797002       | 1.434747692 | 622623112706.D08          | .H07.G08.E09.D10.B11.A12 |
| epivincamine          | 36.5148752    | 35.08636713       | 1.428508073 | 640641112706.B08          | .H07.G08.E09.D10.B11.A12 |
| tinidazole            | 35.38709443   | 33.96129529       | 1.425799146 | 5500024025833041107269.C  | .H07.E09.D10.B11.A12     |
| sulfapyridine         | 35.3782681    | 33.96076648       | 1.417501618 | 5500024025833041107269.B  | .H01.G02.E03.D04.B05.A06 |
| procarbazine          | 35.56014959   | 34.17633596       | 1.383813638 | 5500024030760072207033.C  | .H07.G08.E09.B11.A12     |
| cefoperazone          | 34.79522354   | 33.45797002       | 1.337253525 | 622623112706.A11          | .H07.G08.E09.D10.B11.A12 |
| sulotidil             | 38.33544692   | 37.00786033       | 1.327586586 | 5500024024213121906563.B  | .H01.G02.E03.D04.B05.A06 |
| terbutaline           | 34.7771468    | 33.4530122        | 1.324134603 | 622623112706.A05          | .H01.G02.E03.B05.A06     |
| oxedrine              | 38.55338232   | 37.24787327       | 1.30550905  | 5500024035736031208612.B  | .H01.G02.E03.D04.B05.A06 |
| adenosine phosphate   | 34.74637614   | 33.45797002       | 1.288406124 | 622623112706.B12          | .H07.G08.E09.D10.B11.A12 |

|                        |             |             |             |                           |                          |
|------------------------|-------------|-------------|-------------|---------------------------|--------------------------|
| minocycline            | 34.27960567 | 33.00109826 | 1.278507406 | 5500024024213121906560.B  | .H07.G08.E09.D10.B11.A12 |
| methyl dopa            | 34.73089855 | 33.45797002 | 1.272928536 | 622623112706.B08          | .H07.G08.E09.D10.B11.A12 |
| tanespimycin           | 37.41090461 | 36.14209273 | 1.268811883 | 5500024017802120306174.H  | .H01.G02.E03.D04.B05.A06 |
| sodium phenylbutyrate  | 36.19585457 | 34.94387722 | 1.251977344 | EC2004030505AA            | EC2004030502AA           |
| sirolimus              | 37.38065671 | 36.14209273 | 1.238563978 | 5500024017802120306174.H  | .H01.G02.E03.D04.B05.A06 |
| nitrendipine           | 38.47482725 | 37.24471367 | 1.23011358  | 5500024030700072107987.D  | .H01.G02.E03.D04.B05.A06 |
| tribenoside            | 35.39776883 | 34.17633596 | 1.221432876 | 5500024030760072207033.H  | .H07.G08.E09.B11.A12     |
| fenbendazole           | 34.66783611 | 33.45935203 | 1.20848408  | 5500024024213121906560.C  | .H01.G02.E03.D04.B05.A06 |
| tolazoline             | 36.47538332 | 35.2669347  | 1.208448618 | 612613111306.A01          | .H01.G02.E03.D04.B05.A06 |
| terazosin              | 35.1686715  | 33.96076648 | 1.207905022 | 5500024025833041107269.C  | .H01.G02.E03.D04.B05.A06 |
| leflunomide            | 35.15656113 | 33.96076648 | 1.195794652 | 5500024025833041107269.A  | .H01.G02.E03.D04.B05.A06 |
| dydrogesterone         | 36.21255939 | 35.01997127 | 1.19258812  | 5500024024213121906559.C  | .H01.G02.E03.D04.B05.A06 |
| ethotoin               | 36.24958436 | 35.05833814 | 1.191246214 | 5500024024213121906559.C  | .H07.G08.E09.D10.B11.A12 |
| sirolimus              | 36.12983309 | 34.94387722 | 1.18595587  | EC2004030504AA            | EC2004030502AA           |
| dobutamine             | 34.62309094 | 33.45797002 | 1.165120926 | 622623112706.H11          | .H07.G08.E09.D10.B11.A12 |
| thioridazine           | 35.57987637 | 34.42118584 | 1.158690534 | 5500024030401071707292.C  | .H01.G02.E03.D04.B05.A06 |
| dipivefrine            | 36.24446957 | 35.08636713 | 1.158102443 | 640641112706.H09          | .H07.G08.E09.D10.B11.A12 |
| trichostatin A         | 34.60433485 | 33.4530122  | 1.151322653 | 622623112706.F06          | .H01.G02.E03.B05.A06     |
| disulfiram             | 35.89892333 | 34.74789333 | 1.151030004 | 614615111406.G03          | .H01.G02.E03.D04.B05.A06 |
| clorgiline             | 34.59688955 | 33.45797002 | 1.138919535 | 6.23E+21                  | .H07.G08.E09.D10.B11.A12 |
| helveticoside          | 36.18138784 | 35.05833814 | 1.123049702 | 5500024024213121906559.D  | .H07.G08.E09.D10.B11.A12 |
| tanespimycin           | 37.25859978 | 36.14209273 | 1.116507047 | 5500024017802120306174.D  | .H01.G02.E03.D04.B05.A06 |
| tanespimycin           | 37.25782303 | 36.14209273 | 1.115730305 | 5500024017802120306174.D  | .H01.G02.E03.D04.B05.A06 |
| sanguinarine           | 35.82495099 | 34.70962788 | 1.11532311  | 5500024030760072207033.C  | .H01.G02.E03.D04.B05.A06 |
| felodipine             | 36.26394616 | 35.15552717 | 1.108418993 | 5500024024214122006604.FI | .H01.G02.E03.D04.A06     |
| meptazinol             | 35.80590567 | 34.70962788 | 1.096277791 | 5500024030760072207033.G  | .H01.G02.E03.D04.B05.A06 |
| kinetin                | 35.049997   | 33.96076648 | 1.089230518 | 5500024025833041107269.G  | .H01.G02.E03.D04.B05.A06 |
| monorden               | 35.50906946 | 34.42118584 | 1.087883627 | 5.50E+22                  | .H01.G02.E03.D04.B05.A06 |
| alclometasone          | 35.04764119 | 33.96076648 | 1.086874712 | 5500024025833041107269.C  | .H01.G02.E03.D04.B05.A06 |
| glafenine              | 34.08374321 | 33.00109826 | 1.08264495  | 5.50E+28                  | .H07.G08.E09.D10.B11.A12 |
| gossypol               | 36.13134996 | 35.05833814 | 1.073011817 | 5500024024213121906559.B  | .H07.G08.E09.D10.B11.A12 |
| clofazimine            | 34.49988551 | 33.45797002 | 1.041915497 | 622623112706.A08          | .H07.G08.E09.D10.B11.A12 |
| albendazole            | 34.49144571 | 33.4530122  | 1.038433508 | 622623112706.H03          | .H01.G02.E03.B05.A06     |
| monorden               | 38.35130907 | 37.31290545 | 1.038403621 | 5.50E+28                  | .G08.E09.D10.B11.A12     |
| sulfafurazole          | 34.47503053 | 33.45797002 | 1.017060511 | 6.23E+19                  | .H07.G08.E09.D10.B11.A12 |
| lycorine               | 36.0718233  | 35.05833814 | 1.013485162 | 5500024024213121906559.C  | .H07.G08.E09.D10.B11.A12 |
| monorden               | 37.15160021 | 36.14209273 | 1.009507481 | 5.50E+22                  | .H01.G02.E03.D04.B05.A06 |
| haloperidol            | 37.14868775 | 36.14209273 | 1.006595018 | 5500024017802120306174.H  | .H01.G02.E03.D04.B05.A06 |
| etilefrine             | 35.71525263 | 34.70962788 | 1.005624753 | 5500024030760072207033.C  | .H01.G02.E03.D04.B05.A06 |
| tranylcypromine        | 36.10656156 | 35.10850208 | 0.998059486 | 614615111406.F10          | .H07.G08.E09.D10.B11.A12 |
| monorden               | 36.15922886 | 35.1615202  | 0.99770866  | EC2004073018AA            | EC2004073014AA           |
| napelline              | 34.9445334  | 33.96076648 | 0.983766925 | 5.50E+26                  | .H01.G02.E03.D04.B05.A06 |
| hexetidine             | 36.13273385 | 35.15552717 | 0.977206684 | 5500024024214122006604.A  | .H01.G02.E03.D04.A06     |
| dipyridamole           | 36.39708991 | 35.4281341  | 0.968955814 | 612613111306.F09          | .H07.G08.E09.D10.B11.A12 |
| astemizole             | 35.71358342 | 34.74789333 | 0.965690091 | 614615111406.H04          | .H01.G02.E03.D04.B05.A06 |
| strophanthidin         | 34.91156136 | 33.96076648 | 0.950794885 | 5500024025833041107269.D  | .H01.G02.E03.D04.B05.A06 |
| anisomycin             | 37.9584653  | 37.00786033 | 0.950604969 | 5500024024213121906563.A  | .H01.G02.E03.D04.B05.A06 |
| piribedil              | 35.12548936 | 34.17633596 | 0.949153399 | 5500024030760072207033.G  | .H07.G08.E09.B11.A12     |
| monensin               | 34.90808649 | 33.96129529 | 0.946791204 | 5500024025833041107269.A  | .H07.E09.D10.B11.A12     |
| atropine oxide         | 35.69259977 | 34.74789333 | 0.944706438 | 614615111406.G04          | .H01.G02.E03.D04.B05.A06 |
| flunixin               | 34.87564012 | 33.96129529 | 0.914344833 | 5500024025833041107269.G  | .H07.E09.D10.B11.A12     |
| hexestrol              | 34.85938791 | 33.96076648 | 0.898621437 | 5500024025833041107269.FI | .H01.G02.E03.D04.B05.A06 |
| ethaverine             | 35.10143555 | 34.21031976 | 0.891115792 | 5500024030760072207028.F  | .H07.G08.E09.D10.B11.A12 |
| (+)-chelidonine        | 35.95320999 | 35.08636713 | 0.866842861 | 640641112706.A07          | .H07.G08.E09.D10.B11.A12 |
| vidarabine             | 35.267069   | 34.40088765 | 0.866181352 | 5500024030401071707292.H  | .H07.G08.E09.D10.B11     |
| propantheline bromide  | 34.99429429 | 34.13330462 | 0.860989674 | 5500024030760072207028.C  | .H01.G02.D04.B05.A06     |
| succinylsulfathiazole  | 35.8762855  | 35.01997127 | 0.856314231 | 5500024024213121906559.A  | .H01.G02.E03.D04.B05.A06 |
| alexidine              | 34.81754385 | 33.96129529 | 0.856248558 | 5500024025833041107269.B  | .H07.E09.D10.B11.A12     |
| trichostatin A         | 34.80915105 | 33.96129529 | 0.847855759 | 5500024025833041107269.D  | .H07.E09.D10.B11.A12     |
| ethoxyquin             | 34.80825795 | 33.96129529 | 0.846962658 | 5.50E+31                  | .H07.E09.D10.B11.A12     |
| alfuzosin              | 34.29654598 | 33.45797002 | 0.83857596  | 622623112706.H08          | .H07.G08.E09.D10.B11.A12 |
| alvespimycin           | 35.25844788 | 34.42118584 | 0.837262041 | 5500024030401071707292.FI | .H01.G02.E03.D04.B05.A06 |
| mestranol              | 34.96869028 | 34.13330462 | 0.835385663 | 5500024030760072207028.D  | .H01.G02.D04.B05.A06     |
| trichlormethiazide     | 34.96535166 | 34.13330462 | 0.83204704  | 5500024030760072207028.FI | .H01.G02.D04.B05.A06     |
| amantadine             | 37.67075836 | 36.83996258 | 0.830795777 | 5500024024213121906563.A  | .H07.G08.E09.D10.B11.A12 |
| dihydroergocristine    | 35.93561975 | 35.11129025 | 0.824329501 | 640641112706.B06          | .H01.G02.E03.D04.B05     |
| 15-delta prostaglandin | 38.13549291 | 37.31290545 | 0.822587458 | 5500024035736031208612.C  | .G08.E09.D10.B11.A12     |
| sulfadimidine          | 34.77846092 | 33.96129529 | 0.81716563  | 5.50E+32                  | .H07.E09.D10.B11.A12     |
| meclofenoxate          | 34.76059775 | 33.96129529 | 0.799302458 | 5500024025833041107269.H  | .H07.E09.D10.B11.A12     |



|                        |             |             |             |                          |                          |
|------------------------|-------------|-------------|-------------|--------------------------|--------------------------|
| prochlorperazine       | 38.10699232 | 37.31290545 | 0.794086867 | 5500024035736031208612.F | .G08.E09.D10.B11.A12     |
| noretynodrel           | 38.43104462 | 37.63864853 | 0.792396088 | 5500024024213121906564.C | .H07.G08.D10.B11.A12     |
| rolipram               | 38.03593614 | 37.24471367 | 0.791222466 | 5500024030700072107987.G | .H01.G02.E03.D04.B05.A06 |
| sirolimus              | 38.10019147 | 37.31290545 | 0.787286021 | 5.50E+31                 | .G08.E09.D10.B11.A12     |
| tanespimycin           | 38.09902052 | 37.31290545 | 0.786115066 | 5500024035736031208612.D | .G08.E09.D10.B11.A12     |
| monobenzone            | 34.99520176 | 34.21031976 | 0.784882007 | 5500024030760072207028.C | .H07.G08.E09.D10.B11.A12 |
| seneciphylline         | 35.80368957 | 35.01997127 | 0.783718301 | 5500024024213121906559.F | .H01.G02.E03.D04.B05.A06 |
| geldanamycin           | 38.09466582 | 37.31290545 | 0.781760365 | 5500024035736031208612.D | .G08.E09.D10.B11.A12     |
| hesperetin             | 36.19298745 | 35.4281341  | 0.764853349 | 612613111306.C07         | .H07.G08.E09.D10.B11.A12 |
| tanespimycin           | 35.1830758  | 34.42118584 | 0.761889967 | 5500024030401071707292.F | .H01.G02.E03.D04.B05.A06 |
| prednisolone           | 33.7563712  | 33.00109826 | 0.755272941 | 5500024024213121906560.D | .H07.G08.E09.D10.B11.A12 |
| thiuguanosine          | 37.76008378 | 37.00786033 | 0.75222345  | 5500024024213121906563.H | .H01.G02.E03.D04.B05.A06 |
| myricetin              | 37.58854378 | 36.83996258 | 0.748581199 | 5500024024213121906563.C | .H07.G08.E09.D10.B11.A12 |
| isocarboxazid          | 34.7088888  | 33.96129529 | 0.747593512 | 5500024025833041107269.D | .H07.E09.D10.B11.A12     |
| perhexiline            | 33.74539706 | 33.00109826 | 0.744298801 | 5500024024213121906560.A | .H07.G08.E09.D10.B11.A12 |
| bucladesine            | 35.14206007 | 34.40088765 | 0.741172422 | 5500024030401071707292.A | .H07.G08.E09.D10.B11     |
| wortmannin             | 36.88270884 | 36.14209273 | 0.740616116 | 5500024017802120306174.A | .H01.G02.E03.D04.B05.A06 |
| ketanserin             | 34.19648861 | 33.45797002 | 0.738518598 | 622623112706.G10         | .H07.G08.E09.D10.B11.A12 |
| Prestwick-1083         | 34.9141842  | 34.17633596 | 0.737848248 | 5500024030760072207033.B | .H07.G08.E09.B11.A12     |
| fulvestrant            | 36.87950806 | 36.14209273 | 0.737415327 | 5500024017802120306174.H | .H01.G02.E03.D04.B05.A06 |
| riluzole               | 34.19118178 | 33.45935203 | 0.73182975  | 5500024024213121906560.H | .H01.G02.E03.D04.B05.A06 |
| enoxacin               | 34.1806638  | 33.45797002 | 0.722693783 | 622623112706.F08         | .H07.G08.E09.D10.B11.A12 |
| epiandrosterone        | 35.87780523 | 35.15552717 | 0.722278068 | 5500024024214122006604.D | .H01.G02.E03.D04.A06     |
| acetylsalicylic acid   | 36.86361931 | 36.14209273 | 0.721526586 | 5500024017802120306174.H | .H01.G02.E03.D04.B05.A06 |
| pyridoxine             | 35.80193583 | 35.08636713 | 0.715568706 | 640641112706.G11         | .H07.G08.E09.D10.B11.A12 |
| arcaine                | 34.84653264 | 34.13330462 | 0.713228021 | 5500024030760072207028.C | .H01.G02.D04.B05.A06     |
| trichostatin A         | 34.16855489 | 33.45797002 | 0.710584875 | 622623112706.C07         | .H07.G08.E09.D10.B11.A12 |
| isoflupredone          | 38.34652553 | 37.63864853 | 0.707877005 | 5500024024213121906564.A | .H07.G08.D10.B11.A12     |
| sirolimus              | 36.84428851 | 36.14209273 | 0.702195783 | 5.50E+25                 | .H01.G02.E03.D04.B05.A06 |
| tanespimycin           | 36.83985847 | 36.14209273 | 0.69776574  | 5500024017802120306174.F | .H01.G02.E03.D04.B05.A06 |
| amphotericin B         | 35.85131543 | 35.15552717 | 0.695788266 | 5500024024214122006604.D | .H01.G02.E03.D04.A06     |
| nomifensine            | 35.43521246 | 34.74789333 | 0.687319135 | 614615111406.F06         | .H01.G02.E03.D04.B05.A06 |
| chlorphenamine         | 35.4336778  | 34.74789333 | 0.685784468 | 614615111406.G05         | .H01.G02.E03.D04.B05.A06 |
| genistein              | 37.9976951  | 37.31290545 | 0.684789649 | 5500024035736031208612.B | .G08.E09.D10.B11.A12     |
| tanespimycin           | 37.99422912 | 37.31290545 | 0.681323668 | 5500024035736031208612.D | .G08.E09.D10.B11.A12     |
| karakoline             | 35.72922332 | 35.05833814 | 0.67088518  | 5500024024213121906559.B | .H07.G08.E09.D10.B11.A12 |
| riboflavin             | 35.75443541 | 35.08636713 | 0.668068286 | 6.41E+19                 | .H07.G08.E09.D10.B11.A12 |
| sirolimus              | 36.80957594 | 36.14209273 | 0.667483214 | 5500024017802120306174.A | .H01.G02.E03.D04.B05.A06 |
| tamoxifen              | 35.41073796 | 34.74789333 | 0.662844629 | 614615111406.H05         | .H01.G02.E03.D04.B05.A06 |
| pseudopelletierine     | 35.74918615 | 35.08636713 | 0.662819021 | 640641112706.D11         | .H07.G08.E09.D10.B11.A12 |
| famprofazone           | 35.72076023 | 35.05833814 | 0.662422086 | 5500024024213121906559.G | .H07.G08.E09.D10.B11.A12 |
| syrosingopine          | 35.74130524 | 35.08636713 | 0.654938112 | 640641112706.F07         | .H07.G08.E09.D10.B11.A12 |
| clorsulon              | 35.75351534 | 35.11129025 | 0.642225094 | 640641112706.D06         | .H01.G02.E03.D04.B05     |
| thalidomide            | 35.74898923 | 35.10850208 | 0.640487156 | 614615111406.G10         | .H07.G08.E09.D10.B11.A12 |
| homochlorcyclizine     | 33.63769796 | 33.00109826 | 0.636599701 | 5500024024213121906560.F | .H07.G08.E09.D10.B11.A12 |
| 8-azaguanine           | 38.27285393 | 37.63864853 | 0.634205401 | 5500024024213121906564.H | .H07.G08.D10.B11.A12     |
| benfluorex             | 37.63020609 | 37.00786033 | 0.622345761 | 5500024024213121906563.H | .H01.G02.E03.D04.B05.A06 |
| prasterone             | 37.86655834 | 37.24471367 | 0.621844672 | 5500024030700072107987.B | .H01.G02.E03.D04.B05.A06 |
| lanatoside C           | 35.67985798 | 35.05833814 | 0.621519837 | 5500024024213121906559.D | .H07.G08.E09.D10.B11.A12 |
| diazoxide              | 35.3657685  | 34.74789333 | 0.617875174 | 614615111406.G01         | .H01.G02.E03.D04.B05.A06 |
| genistein              | 35.03766741 | 34.42118584 | 0.616481571 | 5500024030401071707292.B | .H01.G02.E03.D04.B05.A06 |
| zimeldine              | 36.03898119 | 35.4281341  | 0.610847094 | 612613111306.G10         | .H07.G08.E09.D10.B11.A12 |
| practolol              | 34.06755525 | 33.45797002 | 0.609585229 | 622623112706.H09         | .H07.G08.E09.D10.B11.A12 |
| tanespimycin           | 37.91973731 | 37.31290545 | 0.606831858 | 5500024035736031208612.F | .G08.E09.D10.B11.A12     |
| fludrocortide          | 35.66496125 | 35.05833814 | 0.606623113 | 5.50E+28                 | .H07.G08.E09.D10.B11.A12 |
| spiperone              | 34.05813599 | 33.4530122  | 0.605123787 | 622623112706.F04         | .H01.G02.E03.B05.A06     |
| nordihydroguaiaretic ; | 36.74215328 | 36.14209273 | 0.600060552 | 5.50E+27                 | .H01.G02.E03.D04.B05.A06 |
| hycanthone             | 34.05790944 | 33.45797002 | 0.59993942  | 622623112706.C09         | .H07.G08.E09.D10.B11.A12 |
| geldanamycin           | 36.74037057 | 36.14209273 | 0.598277838 | 5500024017802120306174.D | .H01.G02.E03.D04.B05.A06 |
| thiamazole             | 34.559231   | 33.96129529 | 0.597935713 | 5500024025833041107269.C | .H07.E09.D10.B11.A12     |
| scopolamine            | 34.72791807 | 34.13330462 | 0.59461345  | 5500024030760072207028.B | .H01.G02.D04.B05.A06     |
| halcinonide            | 35.65117568 | 35.05833814 | 0.592837537 | 5.50E+29                 | .H07.G08.E09.D10.B11.A12 |
| monocrotaline          | 35.6782273  | 35.08636713 | 0.591860175 | 640641112706.G09         | .H07.G08.E09.D10.B11.A12 |
| S-propranolol          | 34.76790996 | 34.17633596 | 0.591574006 | 5.50E+33                 | .H07.G08.E09.B11.A12     |
| mepacrine              | 34.04252126 | 33.4530122  | 0.589509056 | 6.23E+13                 | .H01.G02.E03.B05.A06     |
| nystatin               | 35.71949145 | 35.13162255 | 0.587868895 | 5500024024214122006604.A | .H07.G08.E09.D10.B11.A12 |
| cloperastine           | 34.5486814  | 33.96129529 | 0.587386113 | 5500024025833041107269.G | .H07.E09.D10.B11.A12     |
| ritodrine              | 37.59247434 | 37.00786033 | 0.584614011 | 5.50E+23                 | .H01.G02.E03.D04.B05.A06 |
| tolazamide             | 35.71511685 | 35.13162255 | 0.5834943   | 5.50E+33                 | .H07.G08.E09.D10.B11.A12 |

|                        |             |             |             |                           |                          |
|------------------------|-------------|-------------|-------------|---------------------------|--------------------------|
| tretinoin              | 36.7741938  | 36.19585457 | 0.578339229 | EC2004032013AA            | EC2004032009AA           |
| naltrexone             | 35.32314641 | 34.74789333 | 0.575253086 | 614615111406.H02          | .H01.G02.E03.D04.B05.A06 |
| furosemide             | 34.02773041 | 33.4530122  | 0.574718209 | 622623112706.B06          | .H01.G02.E03.B05.A06     |
| oxytetracycline        | 34.02769716 | 33.4530122  | 0.574684957 | 622623112706.G04          | .H01.G02.E03.B05.A06     |
| isoxsuprine            | 35.83649986 | 35.2669347  | 0.569565158 | 612613111306.D02          | .H01.G02.E03.D04.B05.A06 |
| Prestwick-685          | 35.62753583 | 35.05833814 | 0.569197692 | 5.50E+33                  | .H07.G08.E09.D10.B11.A12 |
| cefmetazole            | 34.52638719 | 33.96076648 | 0.56562071  | 5500024025833041107269.D  | .H01.G02.E03.D04.B05.A06 |
| pramocaine             | 35.62365293 | 35.05833814 | 0.565314784 | 5500024024213121906559.C  | .H07.G08.E09.D10.B11.A12 |
| isosorbide             | 35.61874537 | 35.05833814 | 0.560407233 | 5500024024213121906559.F  | .H07.G08.E09.D10.B11.A12 |
| isoconazole            | 35.30703018 | 34.74789333 | 0.559136856 | 614615111406.G06          | .H01.G02.E03.D04.B05.A06 |
| sulconazole            | 34.76884126 | 34.21031976 | 0.558521504 | 5500024030760072207028.FI | .H07.G08.E09.D10.B11.A12 |
| naftifine              | 34.7309977  | 34.17633596 | 0.554661745 | 5500024030760072207033.B  | .H07.G08.E09.B11.A12     |
| altizide               | 34.50738611 | 33.96076648 | 0.546619635 | 5500024025833041107269.D  | .H01.G02.E03.D04.B05.A06 |
| etiocholanolone        | 35.60466483 | 35.05833814 | 0.546326693 | 5500024024213121906559.A  | .H07.G08.E09.D10.B11.A12 |
| fendiline              | 33.99399733 | 33.4530122  | 0.540985126 | 622623112706.C03          | .H01.G02.E03.B05.A06     |
| beta-escin             | 35.59642648 | 35.05833814 | 0.538088336 | 5500024024213121906559.C  | .H07.G08.E09.D10.B11.A12 |
| scoulerine             | 35.6484449  | 35.11129025 | 0.537154645 | 640641112706.B01          | .H01.G02.E03.D04.B05     |
| hydroquinine           | 35.62128647 | 35.08636713 | 0.534919346 | 640641112706.D12          | .H07.G08.E09.D10.B11.A12 |
| benzethonium chlorid   | 34.49512528 | 33.96076648 | 0.534358804 | 5500024025833041107269.G  | .H01.G02.E03.D04.B05.A06 |
| metitepine             | 33.98414598 | 33.45797002 | 0.526175965 | 622623112706.C11          | .H07.G08.E09.D10.B11.A12 |
| alpha-estradiol        | 36.66821918 | 36.14209273 | 0.526126453 | 5500024017802120306174.G  | .H01.G02.E03.D04.B05.A06 |
| 3-hydroxy-DL-kynurei   | 37.53389624 | 37.00786033 | 0.526035912 | 5500024024213121906563.A  | .H01.G02.E03.D04.B05.A06 |
| metanephine            | 35.95272    | 35.4281341  | 0.524585904 | 612613111306.F07          | .H07.G08.E09.D10.B11.A12 |
| butamben               | 34.48262707 | 33.96076648 | 0.521860595 | 5500024025833041107269.C  | .H01.G02.E03.D04.B05.A06 |
| N6-methyladenosine     | 37.52815045 | 37.00786033 | 0.520290118 | 5500024024213121906563.G  | .H01.G02.E03.D04.B05.A06 |
| demeclocycline         | 34.4791273  | 33.96129529 | 0.517832007 | 5500024025833041107269.H  | .H07.E09.D10.B11.A12     |
| metergoline            | 33.97461272 | 33.45797002 | 0.516642707 | 6.23E+23                  | .H07.G08.E09.D10.B11.A12 |
| gemfibrozil            | 35.61971284 | 35.10850208 | 0.511210767 | 614615111406.C07          | .H07.G08.E09.D10.B11.A12 |
| naringin               | 35.66183818 | 35.15552717 | 0.506311015 | 5500024024214122006604.H  | .H01.G02.E03.D04.B05     |
| zalcitabine            | 35.21489349 | 34.70962788 | 0.505265604 | 5500024030760072207033.B  | .H01.G02.E03.D04.B05.A06 |
| etacrynic acid         | 33.95771786 | 33.4530122  | 0.504705659 | 6.23E+16                  | .H01.G02.E03.B05.A06     |
| bambuterol             | 33.95723066 | 33.4530122  | 0.504218461 | 622623112706.A02          | .H01.G02.E03.B05.A06     |
| arecoline              | 37.5117442  | 37.00786033 | 0.503883872 | 5500024024213121906563.A  | .H01.G02.E03.D04.B05.A06 |
| clomipramine           | 33.95487233 | 33.4530122  | 0.501860125 | 6.23E+17                  | .H01.G02.E03.B05.A06     |
| fluphenazine           | 37.81345797 | 37.31290545 | 0.50055252  | 5500024035736031208612.B  | .G08.E09.D10.B11.A12     |
| estropipate            | 34.46070831 | 33.96076648 | 0.499941836 | 5500024025833041107269.H  | .H01.G02.E03.D04.B05.A06 |
| carcinine              | 37.33828066 | 36.83996258 | 0.498318084 | 5500024024213121906563.H  | .H07.G08.E09.D10.B11.A12 |
| cinchocaine            | 35.75253337 | 35.2669347  | 0.485598666 | 612613111306.G03          | .H01.G02.E03.D04.B05.A06 |
| mianserin              | 35.23212454 | 34.74789333 | 0.484231208 | 614615111406.D02          | .H01.G02.E03.D04.B05.A06 |
| atropine               | 35.56859761 | 35.08636713 | 0.482230481 | 6.41E+21                  | .H07.G08.E09.D10.B11.A12 |
| piperacetazine         | 37.72711972 | 37.24787327 | 0.479246444 | 5500024035736031208612.C  | .H01.G02.E03.D04.B05.A06 |
| prochlorperazine       | 34.89801171 | 34.42118584 | 0.476825876 | 5500024030401071707292.FI | .H01.G02.E03.D04.B05.A06 |
| zaprinast              | 33.93112166 | 33.45797002 | 0.47315164  | 622623112706.D12          | .H07.G08.E09.D10.B11.A12 |
| hydrocotarnine         | 35.55577107 | 35.08636713 | 0.469403938 | 640641112706.D08          | .H07.G08.E09.D10.B11.A12 |
| nordihydroguaiaretic ; | 34.8899033  | 34.42118584 | 0.468717464 | 5.50E+27                  | .H01.G02.E03.D04.B05.A06 |
| sirolimus              | 37.78157442 | 37.31290545 | 0.468668964 | 5500024035736031208612.H  | .G08.E09.D10.B11.A12     |
| cetirizine             | 35.59342105 | 35.13162255 | 0.461798494 | 5500024024214122006604.G  | .H07.G08.E09.D10.B11.A12 |
| estradiol              | 36.60303743 | 36.14209273 | 0.460944704 | 5500024017802120306174.G  | .H01.G02.E03.D04.B05.A06 |
| fluticasone            | 35.16707276 | 34.70962788 | 0.457444884 | 5500024030760072207033.C  | .H01.G02.E03.D04.B05.A06 |
| fulvestrant            | 37.7655889  | 37.31290545 | 0.452683445 | 5500024035736031208612.B  | .G08.E09.D10.B11.A12     |
| trihexyphenidyl        | 35.47122921 | 35.01997127 | 0.451257943 | 5500024024213121906559.B  | .H01.G02.E03.D04.B05.A06 |
| cyanocobalamin         | 37.28830596 | 36.83996258 | 0.448343384 | 5500024024213121906563.FI | .H07.G08.E09.D10.B11.A12 |
| clioquinol             | 37.69105896 | 37.24471367 | 0.446345288 | 5.50E+26                  | .H01.G02.E03.D04.B05.A06 |
| terfenadine            | 35.19272003 | 34.74789333 | 0.444826699 | 6.15E+15                  | .H01.G02.E03.D04.B05.A06 |
| triflusal              | 35.55483573 | 35.11129025 | 0.44354548  | 640641112706.G04          | .H01.G02.E03.D04.B05     |
| wortmannin             | 37.7522501  | 37.31290545 | 0.439344649 | 5500024035736031208612.A  | .G08.E09.D10.B11.A12     |
| nitrofurant            | 35.59474325 | 35.15552717 | 0.439216087 | 5500024024214122006604.A  | .H01.G02.E03.D04.B05.A06 |
| pheneticillin          | 34.39948686 | 33.96076648 | 0.438720379 | 5500024025833041107269.A  | .H01.G02.E03.D04.B05.A06 |
| fenofibrate            | 33.43929933 | 33.00109826 | 0.438201071 | 5500024024213121906560.C  | .H07.G08.E09.D10.B11.A12 |
| ranitidine             | 35.54536061 | 35.10850208 | 0.436858536 | 614615111406.H08          | .H07.G08.E09.D10.B11.A12 |
| epitiostanol           | 35.1444931  | 34.70962788 | 0.434865223 | 5500024030760072207033.D  | .H01.G02.E03.D04.B05.A06 |
| benzathine benzylder   | 35.14394544 | 34.70962788 | 0.434317554 | 5500024030760072207033.A  | .H01.G02.E03.D04.B05.A06 |
| naringenin             | 37.27425794 | 36.83996258 | 0.434295361 | 5500024024213121906563.A  | .H07.G08.E09.D10.B11.A12 |
| ramifenazone           | 34.39249489 | 33.96076648 | 0.431728416 | 5500024025833041107269.B  | .H01.G02.E03.D04.B05.A06 |
| oxybenzone             | 37.67621872 | 37.24471367 | 0.431505045 | 5500024030700072107987.C  | .H01.G02.E03.D04.B05.A06 |
| carbenoxolone          | 34.56310345 | 34.13330462 | 0.429798832 | 5500024030760072207028.B  | .H01.G02.D04.B05.A06     |
| sirolimus              | 37.74114553 | 37.31290545 | 0.428240077 | 5500024035736031208612.A  | .G08.E09.D10.B11.A12     |
| noscapine              | 35.51424186 | 35.08636713 | 0.427874733 | 640641112706.H10          | .H07.G08.E09.D10.B11.A12 |
| mometasone             | 35.53869827 | 35.11129025 | 0.427408016 | 640641112706.A01          | .H01.G02.E03.D04.B05     |

|                        |             |             |             |                          |                          |
|------------------------|-------------|-------------|-------------|--------------------------|--------------------------|
| betahistine            | 35.55787998 | 35.13162255 | 0.426257424 | 5500024024214122006604.F | .H07.G08.E09.D10.B11.A12 |
| fusidic acid           | 37.43272858 | 37.00786033 | 0.424868254 | 5500024024213121906563.C | .H01.G02.E03.D04.B05.A06 |
| desipramine            | 33.88177664 | 33.45797002 | 0.423806625 | 622623112706.F07         | .H07.G08.E09.D10.B11.A12 |
| abamectin              | 34.37997495 | 33.96076648 | 0.419208473 | 5.50E+22                 | .H01.G02.E03.D04.B05.A06 |
| canadine               | 35.43698806 | 35.01997127 | 0.417016786 | 5500024024213121906559.A | .H01.G02.E03.D04.B05.A06 |
| methotrexate           | 35.84507929 | 35.4281341  | 0.416945189 | 612613111306.B12         | .H07.G08.E09.D10.B11.A12 |
| triflupromazine        | 38.05548105 | 37.63864853 | 0.416832523 | 5500024024213121906564.D | .H07.G08.D10.B11.A12     |
| androsterone           | 37.42427549 | 37.00786033 | 0.41641516  | 5500024024213121906563.B | .H01.G02.E03.D04.B05.A06 |
| gliquidone             | 37.87393465 | 37.46016387 | 0.413770777 | 5500024030700072107987.D | .H07.G08.E09.D10.B11.A12 |
| flunarizine            | 33.41153801 | 33.00109826 | 0.41043975  | 5500024024213121906560.F | .H07.G08.E09.D10.B11.A12 |
| alvespimycin           | 36.55161251 | 36.14209273 | 0.409519782 | 5500024017802120306174.F | .H01.G02.E03.D04.B05.A06 |
| azaperone              | 37.6560947  | 37.24787327 | 0.408221428 | 5500024035736031208612.C | .H01.G02.E03.D04.B05.A06 |
| urapidil               | 37.64957319 | 37.24471367 | 0.404859523 | 5500024030700072107987.F | .H01.G02.E03.D04.B05.A06 |
| cyclobenzaprine        | 37.24409511 | 36.83996258 | 0.404132536 | 5500024024213121906563.C | .H07.G08.E09.D10.B11.A12 |
| lovastatin             | 35.53309492 | 35.13162255 | 0.40147237  | 5500024024214122006604.B | .H07.G08.E09.D10.B11.A12 |
| dexamethasone          | 35.14869933 | 34.74789333 | 0.400806005 | 614615111406.B02         | .H01.G02.E03.D04.B05.A06 |
| ricinine               | 34.35916224 | 33.96076648 | 0.39839576  | 5500024025833041107269.H | .H01.G02.E03.D04.B05.A06 |
| spectinomycin          | 34.52704451 | 34.13330462 | 0.393739893 | 5500024030760072207028.H | .H01.G02.E03.D04.B05.A06 |
| megestrol              | 37.63684356 | 37.24471367 | 0.39212989  | 5500024030700072107987.C | .H01.G02.E03.D04.B05.A06 |
| coralyne               | 37.39920972 | 37.00786033 | 0.391349389 | 5500024024213121906563.B | .H01.G02.E03.D04.B05.A06 |
| sulfametoxydiazine     | 34.79168156 | 34.40088765 | 0.390793916 | 5500024030401071707292.G | .H07.G08.E09.D10.B11     |
| thioridazine           | 35.65600009 | 35.2669347  | 0.389065388 | 612613111306.D03         | .H01.G02.E03.D04.B05.A06 |
| nicardipine            | 33.84534335 | 33.45797002 | 0.38737333  | 622623112706.F11         | .H07.G08.E09.D10.B11.A12 |
| digitoxinigenin        | 37.22600045 | 36.83996258 | 0.386037867 | 5500024024213121906563.B | .H07.G08.E09.D10.B11.A12 |
| estradiol              | 34.80676894 | 34.42118584 | 0.385583108 | 5500024030401071707292.G | .H01.G02.E03.D04.B05.A06 |
| tetrandrine            | 34.34456867 | 33.96076648 | 0.383802192 | 5.50E+23                 | .H01.G02.E03.D04.B05.A06 |
| Prestwick-559          | 35.49491423 | 35.11129025 | 0.383623982 | 6.41E+15                 | .H01.G02.E03.D04.B05     |
| prochlorperazine       | 36.52387802 | 36.14209273 | 0.381785296 | 5500024017802120306174.F | .H01.G02.E03.D04.B05.A06 |
| cefazolin              | 34.34028334 | 33.96129529 | 0.378988049 | 5500024025833041107269.D | .H07.E09.D10.B11.A12     |
| amiloride              | 35.64588671 | 35.2669347  | 0.378952002 | 612613111306.G04         | .H01.G02.E03.D04.B05.A06 |
| beclometasone          | 34.51019659 | 34.13330462 | 0.376891971 | 5.50E+25                 | .H01.G02.D04.B05.A06     |
| etanidazole            | 34.33732281 | 33.96076648 | 0.376556332 | 5500024025833041107269.G | .H01.G02.E03.D04.B05.A06 |
| gallamine triethiodide | 35.12410601 | 34.74789333 | 0.376212682 | 614615111406.F03         | .H01.G02.E03.D04.B05.A06 |
| ety nodiol             | 37.61946375 | 37.24471367 | 0.374750083 | 5500024030700072107987.A | .H01.G02.E03.D04.B05.A06 |
| 10-methoxyharmalan     | 35.48602664 | 35.11129025 | 0.374736386 | 640641112706.B03         | .H01.G02.E03.D04.B05     |
| flavoxate              | 33.37364786 | 33.00109826 | 0.3725496   | 5500024024213121906560.H | .H07.G08.E09.D10.B11.A12 |
| artemisinin            | 35.48347351 | 35.11129025 | 0.372183256 | 640641112706.H06         | .H01.G02.E03.D04.B05     |
| calycanthine           | 35.45791681 | 35.08636713 | 0.371549687 | 640641112706.D07         | .H07.G08.E09.D10.B11.A12 |
| troleandomycin         | 35.63773148 | 35.2669347  | 0.370796773 | 612613111306.H04         | .H01.G02.E03.D04.B05.A06 |
| lithocholic acid       | 34.33155219 | 33.96129529 | 0.370256897 | 5500024025833041107269.C | .H07.E09.D10.B11.A12     |
| doxazosin              | 34.58022057 | 34.21031976 | 0.369900815 | 5500024030760072207028.H | .H07.G08.E09.D10.B11.A12 |
| raubasine              | 35.48036524 | 35.11129025 | 0.36907499  | 640641112706.A03         | .H01.G02.E03.D04.B05     |
| thiethylperazine       | 37.61605625 | 37.24787327 | 0.368182973 | 5500024035736031208612.B | .H01.G02.E03.D04.B05.A06 |
| indoprofen             | 34.49867569 | 34.13330462 | 0.365371075 | 5500024030760072207028.D | .H01.G02.D04.B05.A06     |
| piperidolate           | 37.61241011 | 37.24787327 | 0.364536835 | 5500024035736031208612.G | .H01.G02.E03.D04.B05.A06 |
| luteolin               | 34.57369658 | 34.21031976 | 0.36337682  | 5.50E+29                 | .H07.G08.E09.D10.B11.A12 |
| benfotiamine           | 35.41994013 | 35.05833814 | 0.361601984 | 5500024024213121906559.G | .H07.G08.E09.D10.B11.A12 |
| disopyramide           | 33.36267214 | 33.00109826 | 0.361573877 | 5500024024213121906560.A | .H07.G08.E09.D10.B11.A12 |
| tanespimycin           | 34.78233684 | 34.42118584 | 0.361151007 | 5500024030401071707292.D | .H01.G02.E03.D04.B05.A06 |
| terconazole            | 35.49250883 | 35.13162255 | 0.36088628  | 5500024024214122006604.D | .H07.G08.E09.D10.B11.A12 |
| piperine               | 37.19944927 | 36.83996258 | 0.359486696 | 5500024024213121906563.D | .H07.G08.E09.D10.B11.A12 |
| iohexol                | 35.51458896 | 35.1552717  | 0.359061794 | 5500024024214122006604.A | .H01.G02.E03.D04.A06     |
| enalapril              | 33.35958708 | 33.00109826 | 0.358488821 | 5500024024213121906560.C | .H07.G08.E09.D10.B11.A12 |
| rolitetracycline       | 34.56826548 | 34.21031976 | 0.357945724 | 5500024030760072207028.G | .H07.G08.E09.D10.B11.A12 |
| fulvestrant            | 36.49998052 | 36.14209273 | 0.357887792 | 5500024017802120306174.B | .H01.G02.E03.D04.B05.A06 |
| viomycin               | 34.5326222  | 34.17633596 | 0.356286239 | 5500024030760072207033.A | .H07.G08.E09.B11.A12     |
| estradiol              | 37.66648356 | 37.31290545 | 0.35357811  | 5500024035736031208612.A | .G08.E09.D10.B11.A12     |
| neomycin               | 35.10142786 | 34.74789333 | 0.353534534 | 6.15E+17                 | .H01.G02.E03.D04.B05.A06 |
| acemetacin             | 33.35308632 | 33.00109826 | 0.351988058 | 5500024024213121906560.A | .H07.G08.E09.D10.B11.A12 |
| yohimbine              | 35.43822305 | 35.08636713 | 0.351855926 | 640641112706.F09         | .H07.G08.E09.D10.B11.A12 |
| cisapride              | 35.50609084 | 35.15552717 | 0.350563673 | 5500024024214122006604.D | .H01.G02.E03.D04.A06     |
| tolbutamide            | 33.80933574 | 33.45935203 | 0.349983714 | 5500024024213121906560.C | .H01.G02.E03.D04.B05.A06 |
| trifluoperazine        | 36.49169112 | 36.14209273 | 0.349598389 | 5500024017802120306174.D | .H01.G02.E03.D04.B05.A06 |
| ethambutol             | 35.61518903 | 35.2669347  | 0.348254322 | 6.13E+15                 | .H01.G02.E03.D04.B05.A06 |
| etodolac               | 35.45632802 | 35.10850208 | 0.347825944 | 614615111406.H11         | .H07.G08.E09.D10.B11.A12 |
| metixene               | 35.50190433 | 35.15552717 | 0.346377162 | 5500024024214122006604.C | .H01.G02.E03.D04.A06     |
| bisoprolol             | 37.35351787 | 37.00786033 | 0.345657541 | 5500024024213121906563.D | .H01.G02.E03.D04.B05.A06 |
| R-atenolol             | 35.47632857 | 35.13162255 | 0.344706021 | 5500024024214122006604.B | .H07.G08.E09.D10.B11.A12 |
| SR-95531               | 37.184414   | 36.83996258 | 0.344451421 | 5500024024213121906563.F | .H07.G08.E09.D10.B11.A12 |

|                       |             |              |             |                          |                          |
|-----------------------|-------------|--------------|-------------|--------------------------|--------------------------|
| norfloxacin           | 35.4511669  | 35.10850208  | 0.34266482  | 614615111406.H10         | .H07.G08.E09.D10.B11.A12 |
| proadifen             | 34.74208912 | 34.40088765  | 0.341201474 | 5500024030401071707292.H | .H07.G08.E09.D10.B11     |
| sulfanilamide         | 34.741365   | 34.40088765  | 0.340477348 | 5500024030401071707292.G | .H07.G08.E09.D10.B11     |
| cefsulodin            | 34.47355288 | 34.13330462  | 0.340248266 | 5500024030760072207028.G | .H01.G02.D04.B05.A06     |
| ribostamycin          | 34.73968054 | 34.40088765  | 0.338792895 | 5500024030401071707292.H | .H07.G08.E09.D10.B11     |
| cefadroxil            | 37.1784657  | 36.83996258  | 0.338503125 | 5.50E+31                 | .H07.G08.E09.D10.B11.A12 |
| Prestwick-689         | 34.29907614 | 33.96076648  | 0.338309659 | 5500024025833041107269.F | .H01.G02.E03.D04.B05.A06 |
| tanespimycin          | 34.75796603 | 34.42118584  | 0.336780194 | 5500024030401071707292.H | .H01.G02.E03.D04.B05.A06 |
| sulfadimethoxine      | 34.29617986 | 33.96129529  | 0.334884574 | 5500024025833041107269.A | .H07.E09.D10.B11.A12     |
| naftopidil            | 35.04395602 | 34.70962788  | 0.334328139 | 5500024030760072207033.F | .H01.G02.E03.D04.B05.A06 |
| dextromethorphan      | 37.34207477 | 37.00786033  | 0.334214443 | 5.50E+25                 | .H01.G02.E03.D04.B05.A06 |
| adrenosterone         | 37.79412535 | 37.46016387  | 0.333961477 | 5500024030700072107987.H | .H07.G08.E09.D10.B11.A12 |
| trazodone             | 33.33454348 | 33.00109826  | 0.333445219 | 5500024024213121906560.G | .H07.G08.E09.D10.B11.A12 |
| pipemidic acid        | 37.57556025 | 37.24471367  | 0.330846576 | 5500024030700072107987.C | .H01.G02.E03.D04.B05.A06 |
| cefotiam              | 35.48416268 | 35.15552717  | 0.328635517 | 5500024024214122006604.A | .H01.G02.E03.D04.A06     |
| rescinnamine          | 35.34806787 | 35.01997127  | 0.328096602 | 5500024024213121906559.H | .H01.G02.E03.D04.B05.A06 |
| cinchonidine          | 35.41118563 | 35.08636713  | 0.324818501 | 640641112706.C11         | .H07.G08.E09.D10.B11.A12 |
| spiramycin            | 34.28567047 | 37.460129529 | 0.324375186 | 5.50E+28                 | .H07.E09.D10.B11.A12     |
| dilazep               | 33.78270225 | 33.45935203  | 0.323350218 | 5500024024213121906560.H | .H01.G02.E03.D04.B05.A06 |
| vitexin               | 35.34099467 | 35.01997127  | 0.321023404 | 5500024024213121906559.C | .H01.G02.E03.D04.B05.A06 |
| nifenzazone           | 35.42783726 | 35.10850208  | 0.319335189 | 614615111406.B10         | .H07.G08.E09.D10.B11.A12 |
| trogglitazone         | 36.4593759  | 36.14209273  | 0.317283173 | 5500024017802120306174.C | .H01.G02.E03.D04.B05.A06 |
| benperidol            | 35.44867006 | 35.13162255  | 0.317047504 | 5500024024214122006604.F | .H07.G08.E09.D10.B11.A12 |
| piretanide            | 37.56460247 | 37.24787327  | 0.316729197 | 5500024035736031208612.D | .H01.G02.E03.D04.B05.A06 |
| difenidol             | 33.31614488 | 33.00109826  | 0.315046612 | 5500024024213121906560.H | .H07.G08.E09.D10.B11.A12 |
| dacarbazine           | 35.40050081 | 35.08636713  | 0.314133681 | 640641112706.F08         | .H07.G08.E09.D10.B11.A12 |
| fluorouracil          | 34.27424115 | 33.96076648  | 0.313474677 | 5.50E+25                 | .H01.G02.E03.D04.B05.A06 |
| benzonatate           | 37.95103263 | 37.63864853  | 0.312384101 | 5500024024213121906564.F | .H07.G08.D10.B11.A12     |
| N-acetylmuramic acid  | 37.15137168 | 36.83996258  | 0.311409101 | 5500024024213121906563.D | .H07.G08.E09.D10.B11.A12 |
| oxyphenbutazone       | 37.55910916 | 37.24787327  | 0.311235887 | 5500024035736031208612.A | .H01.G02.E03.D04.B05.A06 |
| nabumetone            | 37.770286   | 37.46016387  | 0.310122129 | 5500024030700072107987.H | .H07.G08.E09.D10.B11.A12 |
| carbachol             | 34.52017387 | 34.21031976  | 0.309854113 | 5.50E+31                 | .H07.G08.E09.D10.B11.A12 |
| ronidazole            | 37.55687728 | 37.24787327  | 0.309004008 | 5500024035736031208612.F | .H01.G02.E03.D04.B05.A06 |
| ivermectin            | 35.05595801 | 34.74789333  | 0.308064681 | 614615111406.H06         | .H01.G02.E03.D04.B05.A06 |
| dapsone               | 37.94633459 | 37.63864853  | 0.307686057 | 5500024024213121906564.B | .H07.G08.D10.B11.A12     |
| merbromin             | 34.26737564 | 33.96129529  | 0.306080349 | 5500024025833041107269.A | .H07.E09.D10.B11.A12     |
| dimethadione          | 34.51598771 | 34.21031976  | 0.305667949 | 5500024030760072207028.G | .H07.G08.E09.D10.B11.A12 |
| primaquine            | 37.14437926 | 36.83996258  | 0.304416682 | 5500024024213121906563.A | .H07.G08.E09.D10.B11.A12 |
| cyproheptadine        | 35.73157168 | 35.4281341   | 0.303437585 | 6.13E+18                 | .H07.G08.E09.D10.B11.A12 |
| prednisone            | 35.5700989  | 35.2669347   | 0.303164194 | 612613111306.F06         | .H01.G02.E03.D04.B05.A06 |
| benzbromarone         | 37.30894268 | 37.00786033  | 0.301082348 | 5500024024213121906563.C | .H01.G02.E03.D04.B05.A06 |
| tremorine             | 33.75276479 | 33.4530122   | 0.299752587 | 622623112706.B04         | .H01.G02.E03.B05.A06     |
| stachydrine           | 35.38534073 | 35.08636713  | 0.298973601 | 640641112706.H08         | .H07.G08.E09.D10.B11.A12 |
| iocetamic acid        | 34.42847179 | 34.13330462  | 0.295167174 | 5500024030760072207028.A | .H01.G02.D04.B05.A06     |
| mexiletine            | 33.75384478 | 33.45935203  | 0.294492756 | 5500024024213121906560.B | .H01.G02.E03.D04.B05.A06 |
| clemastine            | 33.29505652 | 33.00109826  | 0.293958252 | 5500024024213121906560.A | .H07.G08.E09.D10.B11.A12 |
| vinburnine            | 35.37916753 | 35.08636713  | 0.2928004   | 640641112706.A09         | .H07.G08.E09.D10.B11.A12 |
| cefapirin             | 34.69263782 | 34.40088765  | 0.291750168 | 5500024030401071707292.C | .H07.G08.E09.D10.B11     |
| levothyroxine sodium  | 37.13077467 | 36.83996258  | 0.290812094 | 5500024024213121906563.G | .H07.G08.E09.D10.B11.A12 |
| streptozocin          | 34.25073402 | 33.96076648  | 0.289967542 | 5500024025833041107269.B | .H01.G02.E03.D04.B05.A06 |
| tetrahydroalstonine   | 35.37616358 | 35.08636713  | 0.289796454 | 640641112706.G07         | .H07.G08.E09.D10.B11.A12 |
| acebutolol            | 35.55627874 | 35.2669347   | 0.289344032 | 612613111306.C05         | .H01.G02.E03.D04.B05.A06 |
| trichostatin A        | 33.2901582  | 33.00109826  | 0.289059935 | 5500024024213121906560.H | .H07.G08.E09.D10.B11.A12 |
| hymecromone           | 34.49916319 | 34.21031976  | 0.28884343  | 5500024030760072207028.D | .H07.G08.E09.D10.B11.A12 |
| estradiol             | 34.70641817 | 34.42118584  | 0.28523233  | 5500024030401071707292.A | .H01.G02.E03.D04.B05.A06 |
| glimepiride           | 35.30515732 | 35.01997127  | 0.285186054 | 5500024024213121906559.C | .H01.G02.E03.D04.B05.A06 |
| metrizamide           | 37.12421106 | 36.83996258  | 0.284248484 | 5500024024213121906563.F | .H07.G08.E09.D10.B11.A12 |
| glipizide             | 35.71139785 | 35.4281341   | 0.283263754 | 612613111306.H11         | .H07.G08.E09.D10.B11.A12 |
| trichostatin A        | 36.42498967 | 36.14209273  | 0.282896942 | 5500024017802120306174.G | .H01.G02.E03.D04.B05.A06 |
| chenodeoxycholic acid | 33.28355158 | 33.00109826  | 0.28245332  | 5500024024213121906560.C | .H07.G08.E09.D10.B11.A12 |
| griseofulvin          | 33.74166329 | 33.45935203  | 0.282311263 | 5500024024213121906560.H | .H01.G02.E03.D04.B05.A06 |
| trifluoperazine       | 34.70019429 | 34.42118584  | 0.279008451 | 5500024030401071707292.D | .H01.G02.E03.D04.B05.A06 |
| ganciclovir           | 34.48913801 | 34.21031976  | 0.278818256 | 5500024030760072207028.G | .H07.G08.E09.D10.B11.A12 |
| cyclopenthiiazide     | 34.98818433 | 34.70962788  | 0.27855645  | 5500024030760072207033.H | .H01.G02.E03.D04.B05.A06 |
| imipramine            | 37.91595489 | 37.63864853  | 0.277306365 | 5.50E+28                 | .H07.G08.D10.B11.A12     |
| praziquantel          | 33.73004652 | 33.4530122   | 0.277034314 | 622623112706.C02         | .H01.G02.E03.B05.A06     |
| benzylpenicillin      | 37.52433834 | 37.24787327  | 0.276465063 | 5500024035736031208612.B | .H01.G02.E03.D04.B05.A06 |
| proguanil             | 34.45207926 | 34.1763596   | 0.275743307 | 5500024030760072207033.H | .H07.G08.E09.B11.A12     |
| mephenytoin           | 37.52191089 | 37.24787327  | 0.274037613 | 5500024035736031208612.A | .H01.G02.E03.D04.B05.A06 |

|                          |             |             |             |                           |                          |
|--------------------------|-------------|-------------|-------------|---------------------------|--------------------------|
| quipazine                | 35.36000288 | 35.08636713 | 0.273635757 | 640641112706.A10          | .H07.G08.E09.D10.B11.A12 |
| propoxycaïne             | 37.52150503 | 37.24787327 | 0.273631759 | 5500024035736031208612.A  | .H01.G02.E03.D04.B05.A06 |
| tonzonium bromide        | 37.51773545 | 37.24471367 | 0.273021778 | 5500024030700072107987.FI | .H01.G02.E03.D04.B05.A06 |
| methylprednisolone       | 33.72533409 | 33.4530122  | 0.272321889 | 622623112706.D01          | .H01.G02.E03.B05.A06     |
| LY-294002                | 36.41444016 | 36.14209273 | 0.272308874 | 5500024017802120306174.D  | .H01.G02.E03.D04.B05.A06 |
| fluoxetine               | 35.42681724 | 35.15552717 | 0.271290077 | 5500024024214122006604.B  | .H01.G02.E03.D04.A06     |
| galantamine              | 35.29110488 | 35.01997127 | 0.271133614 | 5500024024213121906559.H  | .H01.G02.E03.D04.B05.A06 |
| tetramisole              | 35.40112368 | 35.13162255 | 0.269501129 | 5500024024214122006604.C  | .H07.G08.E09.D10.B11.A12 |
| theobromine              | 34.4007191  | 34.13330462 | 0.267414488 | 5500024030760072207028.FI | .H01.G02.D04.B05.A06     |
| corticosterone           | 37.10679447 | 36.83996258 | 0.266831894 | 5500024024213121906563.H  | .H07.G08.E09.D10.B11.A12 |
| tanespimycin             | 37.57965012 | 37.31290545 | 0.266744666 | 5500024035736031208612.H  | .G08.E09.D10.B11.A12     |
| (-)-atenolol             | 37.50965017 | 37.24471367 | 0.264936498 | 5500024030700072107987.H  | .H01.G02.E03.D04.B05.A06 |
| sulfamethoxypyridazii    | 34.22504775 | 33.96129529 | 0.263752458 | 5500024025833041107269.G  | .H07.E09.D10.B11.A12     |
| apomorphine              | 35.6908308  | 35.4281341  | 0.262696699 | 612613111306.H08          | .H07.G08.E09.D10.B11.A12 |
| phenindione              | 35.37271634 | 35.11129025 | 0.261426088 | 640641112706.G05          | .H01.G02.E03.D04.B05     |
| nafacillin               | 34.39250555 | 34.13330462 | 0.259200936 | 5500024030760072207028.H  | .H01.G02.D04.B05.A06     |
| ozagrel                  | 34.43548655 | 34.17633596 | 0.259150596 | 5500024030760072207033.H  | .H07.G08.E09.B11.A12     |
| tiletamine               | 37.71830192 | 37.46016387 | 0.258138055 | 5500024030700072107987.B  | .H07.G08.E09.D10.B11.A12 |
| mebhydrolin              | 37.09672925 | 36.83996258 | 0.256766672 | 5500024024213121906563.C  | .H07.G08.E09.D10.B11.A12 |
| gabexate                 | 34.96497148 | 34.70962788 | 0.255343594 | 5500024030760072207033.A  | .H01.G02.E03.D04.B05.A06 |
| repaglinide              | 37.50217788 | 37.24787327 | 0.254304604 | 5500024035736031208612.FI | .H01.G02.E03.D04.B05.A06 |
| fluvastatin              | 34.4644417  | 34.21031976 | 0.254121943 | 5500024030760072207028.G  | .H07.G08.E09.D10.B11.A12 |
| biperiden                | 35.40866001 | 35.15552717 | 0.253132844 | 5500024024214122006604.A  | .H01.G02.E03.D04.A06     |
| meclumine                | 37.49775843 | 37.24471367 | 0.253044755 | 5500024030700072107987.H  | .H01.G02.E03.D04.B05.A06 |
| thiocolchicoside         | 35.36229225 | 35.11129025 | 0.251002004 | 6.41E+12                  | .H01.G02.E03.D04.B05     |
| nilutamide               | 37.49407628 | 37.24471367 | 0.249362604 | 5500024030700072107987.A  | .H01.G02.E03.D04.B05.A06 |
| nifuroxazide             | 35.38091959 | 35.13162255 | 0.249297034 | 5500024024214122006604.C  | .H07.G08.E09.D10.B11.A12 |
| dorzolamide              | 37.49643967 | 37.24787327 | 0.248566397 | 5500024035736031208612.D  | .H01.G02.E03.D04.B05.A06 |
| guanabenz                | 35.67656073 | 35.4281341  | 0.248426663 | 612613111306.A10          | .H07.G08.E09.D10.B11.A12 |
| prenylamine              | 35.35950161 | 35.11129025 | 0.248211364 | 640641112706.C02          | .H01.G02.E03.D04.B05     |
| nalbuphine               | 34.99512733 | 34.74789333 | 0.247233999 | 6.15E+12                  | .H01.G02.E03.D04.B05.A06 |
| nordihydroguaiaretic :   | 37.55996232 | 37.31290545 | 0.247056864 | 5.50E+33                  | .G08.E09.D10.B11.A12     |
| telenzepine              | 33.24782114 | 33.00109826 | 0.246722879 | 5.50E+29                  | .H07.G08.E09.D10.B11.A12 |
| sulfamerazine            | 35.30451131 | 35.05833814 | 0.246173167 | 5500024024213121906559.F  | .H07.G08.E09.D10.B11.A12 |
| sulpiride                | 35.51249626 | 35.2669347  | 0.245561553 | 612613111306.H06          | .H01.G02.E03.D04.B05.A06 |
| lactobionic acid         | 37.08548915 | 36.83996258 | 0.245526569 | 5500024024213121906563.H  | .H07.G08.E09.D10.B11.A12 |
| phenazopyridine          | 34.20584883 | 33.96076648 | 0.245082355 | 5500024025833041107269.B  | .H01.G02.E03.D04.B05.A06 |
| LY-294002                | 36.38678801 | 36.14209273 | 0.244695284 | 5500024017802120306174.B  | .H01.G02.E03.D04.B05.A06 |
| rifampicin               | 35.37556847 | 35.13162255 | 0.243945912 | 5500024024214122006604.D  | .H07.G08.E09.D10.B11.A12 |
| streptomycin             | 33.69663781 | 33.4530122  | 0.243625606 | 622623112706.B03          | .H01.G02.E03.B05.A06     |
| sulfadiazine             | 37.8817727  | 37.63864853 | 0.243124173 | 5.50E+32                  | .H07.G08.D10.B11.A12     |
| atropine methonitrate    | 37.70249953 | 37.46016387 | 0.242335662 | 5500024030700072107987.FI | .H07.G08.E09.D10.B11.A12 |
| salsolidin               | 35.37385066 | 35.13162255 | 0.242228105 | 5500024024214122006604.H  | .H07.G08.E09.D10.B11.A12 |
| phenelzine               | 33.70024745 | 33.45935203 | 0.240895423 | 5500024024213121906560.C  | .H01.G02.E03.D04.B05.A06 |
| cinchonine               | 35.26081057 | 35.01997127 | 0.2408393   | 5500024024213121906559.G  | .H01.G02.E03.D04.B05.A06 |
| adiphenine               | 37.87886409 | 37.63864853 | 0.240215561 | 5500024024213121906564.A  | .H07.G08.D10.B11.A12     |
| chloroquine              | 35.35127037 | 35.11129025 | 0.239980115 | 640641112706.G06          | .H01.G02.E03.D04.B05     |
| crotamiton               | 34.44908007 | 34.21031976 | 0.238760315 | 5500024030760072207028.C  | .H07.G08.E09.D10.B11.A12 |
| mebeverine               | 33.68595497 | 33.4530122  | 0.23294277  | 622623112706.B01          | .H01.G02.E03.B05.A06     |
| naproxen                 | 37.87145279 | 37.63864853 | 0.232804264 | 5500024024213121906564.A  | .H07.G08.D10.B11.A12     |
| metamizole sodium        | 35.28874956 | 35.05833814 | 0.230411414 | 5500024024213121906559.G  | .H07.G08.E09.D10.B11.A12 |
| prazosin                 | 37.47495277 | 37.24471367 | 0.230239095 | 5500024030700072107987.B  | .H01.G02.E03.D04.B05.A06 |
| idoxuridine              | 35.49565291 | 35.2669347  | 0.228718204 | 6.13E+13                  | .H01.G02.E03.D04.B05.A06 |
| ticlopidine              | 35.49265798 | 35.2669347  | 0.225723274 | 612613111306.F03          | .H01.G02.E03.D04.B05.A06 |
| eticlopride              | 34.4359716  | 34.21031976 | 0.225651848 | 5500024030760072207028.B  | .H07.G08.E09.D10.B11.A12 |
| pimethixene              | 33.2253343  | 33.00109826 | 0.224236038 | 5500024024213121906560.D  | .H07.G08.E09.D10.B11.A12 |
| rimexolone               | 34.4000052  | 34.17633596 | 0.223669247 | 5500024030760072207033.F  | .H07.G08.E09.B11.A12     |
| nortriptyline            | 33.22289526 | 33.00109826 | 0.221796998 | 5.50E+33                  | .H07.G08.E09.D10.B11.A12 |
| nicotinic acid           | 34.43187463 | 34.21031976 | 0.221554876 | 5.50E+32                  | .H07.G08.E09.D10.B11.A12 |
| chloropyramine           | 34.35440311 | 34.13330462 | 0.221098494 | 5500024030760072207028.C  | .H01.G02.D04.B05.A06     |
| 1,4-chrysenequinone      | 35.30723833 | 35.08636713 | 0.220871207 | 640641112706.D09          | .H07.G08.E09.D10.B11.A12 |
| cyproterone              | 37.46836059 | 37.24787327 | 0.220487312 | 5500024035736031208612.H  | .H01.G02.E03.D04.B05.A06 |
| gefitinib                | 35.38197686 | 35.1615202  | 0.220456653 | EC2004073015AA            | EC2004073014AA           |
| naphazoline              | 35.48724765 | 35.2669347  | 0.22031295  | 612613111306.H05          | .H01.G02.E03.D04.B05.A06 |
| amitriptyline            | 37.85645485 | 37.63864853 | 0.217806318 | 5500024024213121906564.B  | .H07.G08.D10.B11.A12     |
| homatropine              | 37.85376647 | 37.63864853 | 0.215117938 | 5500024024213121906564.F  | .H07.G08.D10.B11.A12     |
| lysergol                 | 37.05377726 | 36.83996258 | 0.213814681 | 5.50E+33                  | .H07.G08.E09.D10.B11.A12 |
| acetylsalicylsalicylic a | 34.96048962 | 34.74789333 | 0.212596294 | 614615111406.F05          | .H01.G02.E03.D04.B05.A06 |
| Prestweth-972            | 37.67202658 | 37.46016387 | 0.211862711 | 5500024030700072107987.C  | .H07.G08.E09.D10.B11.A12 |

|                        |             |             |             |                           |                          |
|------------------------|-------------|-------------|-------------|---------------------------|--------------------------|
| asiaticoside           | 34.38800817 | 34.17633596 | 0.211672216 | 5500024030760072207033.H  | .H07.G08.E09.B11.A12     |
| fludrocortisone        | 33.67087347 | 33.45935203 | 0.211521441 | 5500024024213121906560.A  | .H01.G02.E03.D04.B05.A06 |
| phenacetin             | 35.34239372 | 35.13162255 | 0.210771164 | 5500024024214122006604.G  | .H07.G08.E09.D10.B11.A12 |
| LY-294002              | 36.35282016 | 36.14209273 | 0.210727432 | 5500024017802120306174.FI | .H01.G02.E03.D04.B05.A06 |
| fulvestrant            | 34.63037571 | 34.42118584 | 0.209189872 | 5500024030401071707292.H  | .H01.G02.E03.D04.B05.A06 |
| flurbiprofen           | 37.45382797 | 37.24471367 | 0.209114301 | 5500024030700072107987.C  | .H01.G02.E03.D04.B05.A06 |
| zuclopenthixol         | 34.91866578 | 34.70962788 | 0.209037897 | 5500024030760072207033.B  | .H01.G02.E03.D04.B05.A06 |
| vancomycin             | 35.34038123 | 35.13162255 | 0.208758679 | 5500024024214122006604.A  | .H07.G08.E09.D10.B11.A12 |
| tanespimycin           | 34.6271963  | 34.42118584 | 0.206010466 | 5500024030401071707292.D  | .H01.G02.E03.D04.B05.A06 |
| Prestwick-920          | 37.66530751 | 37.46016387 | 0.205143644 | 5500024030700072107987.F  | .H07.G08.E09.D10.B11.A12 |
| alverine               | 35.31356979 | 35.10850208 | 0.205067718 | 614615111406.D08          | .H07.G08.E09.D10.B11.A12 |
| vanoxerine             | 33.66257021 | 33.45797002 | 0.204600195 | 622623112706.A09          | .H07.G08.E09.D10.B11.A12 |
| dosulepin              | 35.31541492 | 35.11129025 | 0.204124666 | 640641112706.H05          | .H01.G02.E03.D04.B05     |
| thiamphenicol          | 37.84009099 | 37.63864853 | 0.201442462 | 5500024024213121906564.B  | .H07.G08.D10.B11.A12     |
| cefalotin              | 34.16145245 | 33.96076648 | 0.20068597  | 5500024025833041107269.FI | .H01.G02.E03.D04.B05.A06 |
| isometheptene          | 37.65996372 | 37.46016387 | 0.199799847 | 5500024030700072107987.A  | .H07.G08.E09.D10.B11.A12 |
| penbutolol             | 34.37580294 | 34.17633596 | 0.199466985 | 5500024030760072207033.BI | .H07.G08.E09.B11.A12     |
| (-)-MK-801             | 37.44322108 | 37.24471367 | 0.19850741  | 5.50E+22                  | .H01.G02.E03.D04.B05.A06 |
| cortisone              | 33.19911869 | 33.00109826 | 0.198020424 | 5500024024213121906560.F  | .H07.G08.E09.D10.B11.A12 |
| pimozide               | 33.65008572 | 33.4530122  | 0.197073519 | 6.23E+12                  | .H01.G02.E03.B05.A06     |
| iproniazid             | 35.30446001 | 35.10850208 | 0.195957938 | 614615111406.A08          | .H07.G08.E09.D10.B11.A12 |
| pirilindole            | 37.65535527 | 37.46016387 | 0.195191401 | 5500024030700072107987.B  | .H07.G08.E09.D10.B11.A12 |
| pirenperone            | 35.3491142  | 35.15552717 | 0.193587029 | 5500024024214122006604.BI | .H01.G02.E03.D04.A06     |
| haloperidol            | 37.50456293 | 37.31290545 | 0.191657482 | 5500024035736031208612.A  | .G08.E09.D10.B11.A12     |
| omeprazole             | 35.32199018 | 35.13162255 | 0.190367624 | 5500024024214122006604.G  | .H07.G08.E09.D10.B11.A12 |
| chlorpromazine         | 37.82868968 | 37.63864853 | 0.190041152 | 5500024024213121906564.C  | .H07.G08.D10.B11.A12     |
| haloperidol            | 35.61454297 | 35.4281341  | 0.186408876 | 612613111306.B09          | .H07.G08.E09.D10.B11.A12 |
| doxepin                | 33.18694792 | 33.00109826 | 0.185849652 | 5500024024213121906560.F  | .H07.G08.E09.D10.B11.A12 |
| clozapine              | 37.49816332 | 37.31290545 | 0.185257863 | 5500024035736031208612.C  | .G08.E09.D10.B11.A12     |
| flumequine             | 35.29372231 | 35.10850208 | 0.185220233 | 614615111406.D12          | .H07.G08.E09.D10.B11.A12 |
| betamethasone          | 33.64227234 | 33.45797002 | 0.184302326 | 622623112706.H12          | .H07.G08.E09.D10.B11.A12 |
| caffeic acid           | 34.39428805 | 34.21031976 | 0.183968298 | 5500024030760072207028.C  | .H07.G08.E09.D10.B11.A12 |
| neostigmine bromide    | 35.33529062 | 35.15552717 | 0.179763457 | 5500024024214122006604.FI | .H01.G02.E03.D04.A06     |
| dicloxacillin          | 35.33444155 | 35.15552717 | 0.178914383 | 5500024024214122006604.D  | .H01.G02.E03.D04.A06     |
| diphemanil metilsulfat | 35.44499039 | 35.2669347  | 0.178055689 | 612613111306.C06          | .H01.G02.E03.D04.B05.A06 |
| cefixime               | 37.0136016  | 36.83996258 | 0.173639025 | 5500024024213121906563.G  | .H07.G08.E09.D10.B11.A12 |
| trichostatin A         | 35.32909794 | 35.15552717 | 0.173570774 | 5500024024214122006604.C  | .H01.G02.E03.D04.A06     |
| ceforanide             | 35.32831328 | 35.15552717 | 0.172786112 | 5500024024214122006604.C  | .H01.G02.E03.D04.A06     |
| gelsemine              | 35.191971   | 35.01997127 | 0.171999731 | 5500024024213121906559.BI | .H01.G02.E03.D04.B05.A06 |
| ifenprodil             | 33.17304696 | 33.00109826 | 0.171948699 | 5500024024213121906560.H  | .H07.G08.E09.D10.B11.A12 |
| velnacrine             | 35.32743767 | 35.15552717 | 0.171910507 | 5500024024214122006604.G  | .H01.G02.E03.D04.A06     |
| ergocalciferol         | 35.32726004 | 35.15552717 | 0.171732876 | 5500024024214122006604.D  | .H01.G02.E03.D04.A06     |
| nimesulide             | 35.2797117  | 35.10850208 | 0.171209629 | 614615111406.D11          | .H07.G08.E09.D10.B11.A12 |
| aminophenazone         | 34.91892465 | 34.74789333 | 0.171031318 | 614615111406.F04          | .H01.G02.E03.D04.B05.A06 |
| Prestwick-692          | 35.19086475 | 35.01997127 | 0.170893485 | 5500024024213121906559.A  | .H01.G02.E03.D04.B05.A06 |
| geldanamycin           | 34.59165827 | 34.42118584 | 0.170472432 | 5500024030401071707292.D  | .H01.G02.E03.D04.B05.A06 |
| diphenylpyraline       | 35.22834716 | 35.05833814 | 0.170009017 | 5500024024213121906559.A  | .H07.G08.E09.D10.B11.A12 |
| letrozole              | 34.87780351 | 34.70962788 | 0.168175627 | 5500024030760072207033.FI | .H01.G02.E03.D04.B05.A06 |
| hemicholinium          | 33.62411671 | 33.45797002 | 0.166146693 | 622623112706.F12          | .H07.G08.E09.D10.B11.A12 |
| proxymetacaine         | 37.62339443 | 37.46016387 | 0.163230559 | 5500024030700072107987.G  | .H07.G08.E09.D10.B11.A12 |
| flunisolid             | 35.22076144 | 35.05833814 | 0.162423298 | 5500024024213121906559.H  | .H07.G08.E09.D10.B11.A12 |
| trimethoprim           | 33.62156699 | 33.45935203 | 0.162214957 | 5500024024213121906560.FI | .H01.G02.E03.D04.B05.A06 |
| guanadrel              | 34.12119464 | 33.96129529 | 0.159899355 | 5500024025833041107269.B  | .H07.E09.D10.B11.A12     |
| ribavirin              | 37.61922767 | 37.46016387 | 0.159063801 | 5500024030700072107987.A  | .H07.G08.E09.D10.B11.A12 |
| cyclopentolate         | 37.4063002  | 37.24787327 | 0.158426928 | 5500024035736031208612.FI | .H01.G02.E03.D04.B05.A06 |
| betonicine             | 35.21614924 | 35.05833814 | 0.157811101 | 5500024024213121906559.A  | .H07.G08.E09.D10.B11.A12 |
| spironolactone         | 34.90484882 | 34.74789333 | 0.156955489 | 6.15E+13                  | .H01.G02.E03.D04.B05.A06 |
| trichostatin A         | 34.55647422 | 34.40088765 | 0.155586574 | 5.50E+31                  | .H07.G08.E09.D10.B11     |
| trichostatin A         | 34.28854502 | 34.13330462 | 0.1552404   | 5500024030760072207028.FI | .H01.G02.D04.B05.A06     |
| valproic acid          | 36.29597245 | 36.14209273 | 0.153879722 | 5.50E+26                  | .H01.G02.E03.D04.B05.A06 |
| etomidate              | 34.33019335 | 34.17633596 | 0.153857393 | 5.50E+28                  | .H07.G08.E09.B11.A12     |
| diphenhydramine        | 37.79175257 | 37.63864853 | 0.153104043 | 5500024024213121906564.A  | .H07.G08.D10.B11.A12     |
| florfenicol            | 37.39565091 | 37.24471367 | 0.150937238 | 5.50E+25                  | .H01.G02.E03.D04.B05.A06 |
| esculin                | 34.36093462 | 34.21031976 | 0.150614868 | 5500024030760072207028.C  | .H07.G08.E09.D10.B11.A12 |
| trifluridine           | 37.39711816 | 37.24787327 | 0.149244882 | 5500024035736031208612.FI | .H01.G02.E03.D04.B05.A06 |
| boldine                | 35.16812124 | 35.01997127 | 0.148149967 | 5500024024213121906559.D  | .H01.G02.E03.D04.B05.A06 |
| ceftazidime            | 35.25894552 | 35.11129025 | 0.147655272 | 640641112706.F02          | .H01.G02.E03.D04.B05     |
| bretylum tosilate      | 34.35499389 | 34.21031976 | 0.14467413  | 5500024030760072207028.B  | .H07.G08.E09.D10.B11.A12 |
| carbimazole            | 35.29987795 | 35.15552717 | 0.144350787 | 5.50E+22                  | .H01.G02.E03.D04.A06     |

|                      |             |             |             |                           |                          |
|----------------------|-------------|-------------|-------------|---------------------------|--------------------------|
| haloperidol          | 34.56547052 | 34.42118584 | 0.144284679 | 5500024030401071707292.H  | .H01.G02.E03.D04.B05.A06 |
| calcium folinate     | 34.10485477 | 33.96129529 | 0.143559483 | 5500024025833041107269.A  | .H07.E09.D10.B11.A12     |
| methoxamine          | 35.27497712 | 35.13162255 | 0.143354563 | 5500024024214122006604.C  | .H07.G08.E09.D10.B11.A12 |
| pinacidil            | 33.14407107 | 33.00109826 | 0.14297281  | 5500024024213121906560.B  | .H07.G08.E09.D10.B11.A12 |
| benzocaine           | 35.16145769 | 35.01997127 | 0.141486416 | 5500024024213121906559.A  | .H01.G02.E03.D04.B05.A06 |
| suxibuzone           | 34.10130452 | 33.96076648 | 0.140538038 | 5500024025833041107269.H  | .H01.G02.E03.D04.B05.A06 |
| octopamine           | 37.60009602 | 37.46016387 | 0.139932148 | 5500024030700072107987.G  | .H07.G08.E09.D10.B11.A12 |
| chlorhexidine        | 35.56573583 | 35.4281341  | 0.13760173  | 6.13E+23                  | .H07.G08.E09.D10.B11.A12 |
| levocabastine        | 34.31311256 | 34.17633596 | 0.136776599 | 5500024030760072207033.G  | .H07.G08.E09.B11.A12     |
| alfadolone           | 37.59569651 | 37.46016387 | 0.135532641 | 5500024030700072107987.D  | .H07.G08.E09.D10.B11.A12 |
| butoconazole         | 35.29027959 | 35.15552717 | 0.134752426 | 5500024024214122006604.G  | .H01.G02.E03.D04.A06     |
| azapropazone         | 37.59488945 | 37.46016387 | 0.13472558  | 5500024030700072107987.A  | .H07.G08.E09.D10.B11.A12 |
| metampicillin        | 35.2427841  | 35.10850208 | 0.134282026 | 614615111406.B12          | .H07.G08.E09.D10.B11.A12 |
| amoxapine            | 35.56222063 | 35.4281341  | 0.13408653  | 612613111306.G11          | .H07.G08.E09.D10.B11.A12 |
| methylodopate        | 34.84322702 | 34.70962788 | 0.133599139 | 5500024030760072207033.A  | .H01.G02.E03.D04.B05.A06 |
| triprolidine         | 33.13401685 | 33.00109826 | 0.132918582 | 5500024024213121906560.G  | .H07.G08.E09.D10.B11.A12 |
| bupivacaine          | 33.1339344  | 33.00109826 | 0.132836132 | 5500024024213121906560.B  | .H07.G08.E09.D10.B11.A12 |
| acetylsalicylic acid | 34.55326048 | 34.42118584 | 0.132074641 | 5500024030401071707292.H  | .H01.G02.E03.D04.B05.A06 |
| ciprofibrate         | 37.37945946 | 37.24787327 | 0.131586188 | 5.50E+23                  | .H01.G02.E03.D04.B05.A06 |
| budesonide           | 35.24233208 | 35.11129025 | 0.131041832 | 640641112706.G03          | .H01.G02.E03.D04.B05     |
| calcium pantothenate | 36.97081228 | 36.83996258 | 0.130849701 | 5500024024213121906563.G  | .H07.G08.E09.D10.B11.A12 |
| tranexamic acid      | 34.87841711 | 34.74789333 | 0.130523782 | 614615111406.A03          | .H01.G02.E03.D04.B05.A06 |
| clemizole            | 33.58757822 | 33.45935203 | 0.128226191 | 5500024024213121906560.G  | .H01.G02.E03.D04.B05.A06 |
| nicergoline          | 34.87552111 | 34.74789333 | 0.127627781 | 614615111406.F02          | .H01.G02.E03.D04.B05.A06 |
| gabapentin           | 34.52829819 | 34.40088765 | 0.127410542 | 5500024030401071707292.C  | .H07.G08.E09.D10.B11     |
| remoxipride          | 37.58718324 | 37.46016387 | 0.12701937  | 5.50E+32                  | .H07.G08.E09.D10.B11.A12 |
| bupropion            | 33.57951553 | 33.4530122  | 0.126503333 | 6.23E+15                  | .H01.G02.E03.B05.A06     |
| cefepime             | 37.37425002 | 37.24787327 | 0.126376746 | 5500024035736031208612.A  | .H01.G02.E03.D04.B05.A06 |
| ciclopirox           | 35.28082212 | 35.15552717 | 0.125294949 | 5500024024214122006604.B  | .H01.G02.E03.D04.A06     |
| fulvestrant          | 34.54647456 | 34.42118584 | 0.125288728 | 5500024030401071707292.B  | .H01.G02.E03.D04.B05.A06 |
| valproic acid        | 37.43784206 | 37.31290545 | 0.12493661  | 5500024035736031208612.G  | .G08.E09.D10.B11.A12     |
| Prestwick-642        | 35.14466333 | 35.01997127 | 0.124692056 | 5500024024213121906559.B  | .H01.G02.E03.D04.B05.A06 |
| chloropyrazine       | 37.3717267  | 37.24787327 | 0.123853429 | 5500024035736031208612.C  | .H01.G02.E03.D04.B05.A06 |
| gliclazide           | 35.2349668  | 35.11129025 | 0.123676548 | 640641112706.F01          | .H01.G02.E03.D04.B05     |
| naproxen             | 34.08387316 | 33.96076648 | 0.123106683 | 5500024025833041107269.C  | .H01.G02.E03.D04.B05.A06 |
| haloperidol          | 36.26513979 | 36.14209273 | 0.123047063 | 5500024017802120306174.A  | .H01.G02.E03.D04.B05.A06 |
| probenecid           | 35.25335337 | 35.13162255 | 0.121730816 | 5500024024214122006604.H  | .H07.G08.E09.D10.B11.A12 |
| nalidixic acid       | 33.58103914 | 33.45935203 | 0.121687107 | 5500024024213121906560.G  | .H01.G02.E03.D04.B05.A06 |
| LY-294002            | 36.26327087 | 36.14209273 | 0.121178143 | 5500024017802120306174.B  | .H01.G02.E03.D04.B05.A06 |
| molsidomine          | 35.23179249 | 35.11129025 | 0.120502237 | 640641112706.H03          | .H01.G02.E03.D04.B05     |
| sirolimus            | 34.54055646 | 34.42118584 | 0.11937062  | 5500024030401071707292.H  | .H01.G02.E03.D04.B05.A06 |
| papaverine           | 35.20540841 | 35.08636713 | 0.119041286 | 640641112706.H12          | .H07.G08.E09.D10.B11.A12 |
| amikacin             | 33.57646286 | 33.45797002 | 0.118492842 | 622623112706.B07          | .H07.G08.E09.D10.B11.A12 |
| aminoglutethimide    | 33.11797238 | 33.00109826 | 0.116874119 | 5.50E+32                  | .H07.G08.E09.D10.B11.A12 |
| 7-aminocephalospor   | 36.95645273 | 36.83996258 | 0.116490156 | 5.50E+29                  | .H07.G08.E09.D10.B11.A12 |
| thiamine             | 35.22758925 | 35.11129025 | 0.116299003 | 640641112706.B04          | .H01.G02.E03.D04.B05     |
| amoxicillin          | 37.12414874 | 37.00786033 | 0.116288412 | 5500024024213121906563.H  | .H01.G02.E03.D04.B05.A06 |
| diethylstilbestrol   | 34.07709867 | 33.96129529 | 0.115803379 | 5500024025833041107269.C  | .H07.E09.D10.B11.A12     |
| trichostatin A       | 34.07443744 | 33.96076648 | 0.113670964 | 5.50E+27                  | .H01.G02.E03.D04.B05.A06 |
| pinidolol            | 34.86125417 | 34.74789333 | 0.113360845 | 614615111406.C04          | .H01.G02.E03.D04.B05.A06 |
| dyclonine            | 33.11400381 | 33.00109826 | 0.112905544 | 5500024024213121906560.D  | .H07.G08.E09.D10.B11.A12 |
| methotrexate         | 33.57077372 | 33.45797002 | 0.112803706 | 622623112706.F10          | .H07.G08.E09.D10.B11.A12 |
| demecarium bromide   | 35.198891   | 35.08636713 | 0.112523868 | 640641112706.C12          | .H07.G08.E09.D10.B11.A12 |
| citolone             | 35.16930027 | 35.05833814 | 0.110962129 | 5500024024213121906559.G  | .H07.G08.E09.D10.B11.A12 |
| flutamide            | 33.57001214 | 33.45935203 | 0.110660113 | 5500024024213121906560.C  | .H01.G02.E03.D04.B05.A06 |
| fluphenazine         | 33.56365079 | 33.4530122  | 0.110638585 | 622623112706.B02          | .H01.G02.E03.B05.A06     |
| ramipril             | 37.35704908 | 37.24787327 | 0.109175806 | 5500024035736031208612.C  | .H01.G02.E03.D04.B05.A06 |
| phensuximide         | 34.28502753 | 34.17633596 | 0.10869157  | 5.50E+31                  | .H07.G08.E09.B11.A12     |
| fosfosal             | 34.24033954 | 34.13330462 | 0.107034921 | 5500024030760072207028.FI | .H01.G02.D04.B05.A06     |
| estriol              | 37.35415371 | 37.24787327 | 0.106280439 | 5.50E+26                  | .H01.G02.E03.D04.B05.A06 |
| norethisterone       | 33.10687841 | 33.00109826 | 0.105780148 | 5500024024213121906560.FI | .H07.G08.E09.D10.B11.A12 |
| cyclic adenosine mon | 34.28206625 | 34.17633596 | 0.105730294 | 5500024030760072207033.C  | .H07.G08.E09.B11.A12     |
| oxybuprocaine        | 35.37194697 | 35.2669347  | 0.105012268 | 612613111306.F04          | .H01.G02.E03.D04.B05.A06 |
| isopropamide iodide  | 34.5049957  | 34.40088765 | 0.104108049 | 5.50E+29                  | .H07.G08.E09.D10.B11     |
| guanethidine         | 33.5569603  | 33.4530122  | 0.103948101 | 622623112706.G05          | .H01.G02.E03.B05.A06     |
| alprenolol           | 33.55595665 | 33.4530122  | 0.102944444 | 622623112706.C01          | .H01.G02.E03.B05.A06     |
| Prestwick-981        | 37.56091205 | 37.46016387 | 0.100748183 | 5.50E+33                  | .H07.G08.E09.D10.B11.A12 |
| glycocholic acid     | 35.25595058 | 35.15552717 | 0.100423417 | 5500024024214122006604.B  | .H01.G02.E03.D04.A06     |
| cytisine             | 35.18667621 | 35.08636713 | 0.100309077 | 6.41E+18                  | .H07.G08.E09.D10.B11.A12 |

|                      |             |             |             |                           |                          |
|----------------------|-------------|-------------|-------------|---------------------------|--------------------------|
| nizatidine           | 34.31061417 | 34.21031976 | 0.10029441  | 5500024030760072207028.D  | .H07.G08.E09.D10.B11.A12 |
| raloxifene           | 34.50058761 | 34.40088765 | 0.099699962 | 5500024030401071707292.B  | .H07.G08.E09.D10.B11     |
| clozapine            | 34.52086319 | 34.42118584 | 0.099677353 | 5500024030401071707292.C  | .H01.G02.E03.D04.B05.A06 |
| naloxone             | 35.52639671 | 35.4281341  | 0.098262613 | 612613111306.H09          | .H07.G08.E09.D10.B11.A12 |
| thioperamide         | 34.30844147 | 34.21031976 | 0.098121714 | 5500024030760072207028.C  | .H07.G08.E09.D10.B11.A12 |
| methapyrilene        | 33.55537315 | 33.45797002 | 0.097403138 | 622623112706.H10          | .H07.G08.E09.D10.B11.A12 |
| levamisole           | 35.20435663 | 35.10850208 | 0.095854557 | 614615111406.G09          | .H07.G08.E09.D10.B11.A12 |
| piracetam            | 35.20712406 | 35.11129025 | 0.09583381  | 640641112706.H02          | .H01.G02.E03.D04.B05     |
| adipidone            | 37.55590979 | 37.46016387 | 0.09574592  | 5500024030700072107987.G  | .H07.G08.E09.D10.B11.A12 |
| mepyramine           | 33.54775313 | 33.4530122  | 0.094740926 | 622623112706.D02          | .H01.G02.E03.B05.A06     |
| bufexamac            | 33.09504419 | 33.00109826 | 0.093945923 | 5500024024213121906560.F1 | .H07.G08.E09.D10.B11.A12 |
| hexamethonium brom   | 35.3607717  | 35.2669347  | 0.093836997 | 6.13E+16                  | .H01.G02.E03.D04.B05.A06 |
| foliosidine          | 35.15156886 | 35.05833814 | 0.093230716 | 5500024024213121906559.B1 | .H07.G08.E09.D10.B11.A12 |
| diflunisal           | 35.3581299  | 35.2669347  | 0.091195192 | 612613111306.C02          | .H01.G02.E03.D04.B05.A06 |
| metyrapone           | 37.3344943  | 37.24471367 | 0.089780634 | 5500024030700072107987.H  | .H01.G02.E03.D04.B05.A06 |
| flufenamic acid      | 35.19827584 | 35.10850208 | 0.089773763 | 6.15E+18                  | .H07.G08.E09.D10.B11.A12 |
| hexylcaine           | 34.48977163 | 34.40088765 | 0.088883986 | 5500024030401071707292.H  | .H07.G08.E09.D10.B11     |
| mafenide             | 35.1957671  | 35.10850208 | 0.087265022 | 614615111406.A07          | .H07.G08.E09.D10.B11.A12 |
| rosiglitazone        | 36.2289294  | 36.14209273 | 0.086836667 | 5500024017802120306174.C  | .H01.G02.E03.D04.B05.A06 |
| ioversol             | 34.29648343 | 34.21031976 | 0.086163671 | 5500024030760072207028.H  | .H07.G08.E09.D10.B11.A12 |
| domperidone          | 37.09343714 | 37.00786033 | 0.08557681  | 5500024024213121906563.A  | .H01.G02.E03.D04.B05.A06 |
| cefoxitin            | 34.4862331  | 34.40088765 | 0.085345453 | 5500024030401071707292.B1 | .H07.G08.E09.D10.B11     |
| chlorpropamide       | 33.54325183 | 33.45797002 | 0.085281812 | 622623112706.G11          | .H07.G08.E09.D10.B11.A12 |
| levobunolol          | 34.21799585 | 34.13330462 | 0.084691236 | 5500024030760072207028.B1 | .H01.G02.D04.B05.A06     |
| hecogenin            | 34.48272339 | 34.40088765 | 0.081835739 | 5500024030401071707292.F  | .H07.G08.E09.D10.B11     |
| reserpine            | 34.21511046 | 34.13330462 | 0.081805839 | 5.50E+27                  | .H01.G02.D04.B05.A06     |
| 4-hydroxyphenazone   | 35.34601754 | 35.2669347  | 0.079082838 | 612613111306.B03          | .H01.G02.E03.D04.B05.A06 |
| xamoterol            | 34.28917651 | 34.21031976 | 0.078856756 | 5500024030760072207028.A  | .H07.G08.E09.D10.B11.A12 |
| clozapine            | 37.08636984 | 37.00786033 | 0.078509508 | 5500024024213121906563.C  | .H01.G02.E03.D04.B05.A06 |
| acetazolamide        | 37.7164076  | 37.63864853 | 0.077759067 | 5.50E+29                  | .H07.G08.D10.B11.A12     |
| cotinine             | 35.5053473  | 35.4281341  | 0.077213199 | 612613111306.G09          | .H07.G08.E09.D10.B11.A12 |
| oxymetazoline        | 35.18318199 | 35.10850208 | 0.074679917 | 614615111406.C08          | .H07.G08.E09.D10.B11.A12 |
| harmaline            | 35.09339326 | 35.01997127 | 0.073421994 | 5500024024213121906559.D  | .H01.G02.E03.D04.B05.A06 |
| acenocoumarol        | 34.82067277 | 34.74789333 | 0.072779438 | 614615111406.C06          | .H01.G02.E03.D04.B05.A06 |
| carteolol            | 36.9097886  | 36.83996258 | 0.06982602  | 5500024024213121906563.B  | .H07.G08.E09.D10.B11.A12 |
| vinpocetine          | 33.52274826 | 33.4530122  | 0.069736059 | 622623112706.F02          | .H01.G02.E03.B05.A06     |
| tiaprofenic acid     | 35.20037754 | 35.13162255 | 0.068754985 | 5500024024214122006604.C  | .H07.G08.E09.D10.B11.A12 |
| isradipine           | 37.52832101 | 37.46016387 | 0.068157137 | 5500024030700072107987.D  | .H07.G08.E09.D10.B11.A12 |
| iodixanol            | 34.20099881 | 34.13330462 | 0.067694188 | 5500024030760072207028.A1 | .H01.G02.D04.B05.A06     |
| tenoxicam            | 35.19931002 | 35.13162255 | 0.067687462 | 5500024024214122006604.A  | .H07.G08.E09.D10.B11.A12 |
| bumetanide           | 33.06875322 | 33.00109826 | 0.067654956 | 5500024024213121906560.A  | .H07.G08.E09.D10.B11.A12 |
| trimipramine         | 34.20072306 | 34.13330462 | 0.067418443 | 5500024030760072207028.D  | .H01.G02.D04.B05.A06     |
| alfaxalone           | 37.52675714 | 37.46016387 | 0.066593273 | 5500024030700072107987.C  | .H07.G08.E09.D10.B11.A12 |
| loxapine             | 35.49463248 | 35.4281341  | 0.066498386 | 612613111306.F08          | .H07.G08.E09.D10.B11.A12 |
| pronetalol           | 34.77609581 | 34.70962788 | 0.066467933 | 5500024030760072207033.H  | .H01.G02.E03.D04.B05.A06 |
| verapamil            | 35.49455638 | 35.4281341  | 0.066422279 | 612613111306.H12          | .H07.G08.E09.D10.B11.A12 |
| trichostatin A       | 33.52442624 | 33.45935203 | 0.065074213 | 5500024024213121906560.A1 | .H01.G02.E03.D04.B05.A06 |
| retrorsine           | 35.08494225 | 35.01997127 | 0.064970979 | 5500024024213121906559.H  | .H01.G02.E03.D04.B05.A06 |
| amylcaine            | 35.3277281  | 35.2669347  | 0.060793392 | 612613111306.C03          | .H01.G02.E03.D04.B05.A06 |
| netilmicin           | 34.23588078 | 34.17633596 | 0.05954482  | 5500024030760072207033.D  | .H07.G08.E09.B11.A12     |
| sulfacetamide        | 37.69791428 | 37.63864853 | 0.059265756 | 5500024024213121906564.C  | .H07.G08.D10.B11.A12     |
| equilin              | 34.26929567 | 34.21031976 | 0.058975919 | 5500024030760072207028.F  | .H07.G08.E09.D10.B11.A12 |
| moracizine           | 34.23456595 | 34.17633596 | 0.05822999  | 5.50E+29                  | .H07.G08.E09.B11.A12     |
| metoclopramide       | 33.5173708  | 33.45935203 | 0.058018773 | 5500024024213121906560.D  | .H01.G02.E03.D04.B05.A06 |
| serotonin            | 35.21320754 | 35.15552717 | 0.057680374 | 5500024024214122006604.C  | .H01.G02.E03.D04.A06     |
| butyl hydroxybenzoat | 37.29992446 | 37.24471367 | 0.055210787 | 5500024030700072107987.H  | .H01.G02.E03.D04.B05.A06 |
| minaprine            | 35.3220152  | 35.2669347  | 0.055080495 | 612613111306.G01          | .H01.G02.E03.D04.B05.A06 |
| bezafibrate          | 37.06177249 | 37.00786033 | 0.053912157 | 5500024024213121906563.F1 | .H01.G02.E03.D04.B05.A06 |
| folic acid           | 35.140016   | 35.08636713 | 0.053648876 | 640641112706.A11          | .H07.G08.E09.D10.B11.A12 |
| sisomicin            | 35.18359914 | 35.13162255 | 0.051976585 | 5500024024214122006604.C  | .H07.G08.E09.D10.B11.A12 |
| Prestwick-682        | 35.07189667 | 35.01997127 | 0.051925403 | 5500024024213121906559.A1 | .H01.G02.E03.D04.B05.A06 |
| naftidrofuryl        | 37.05951333 | 37.00786033 | 0.051653001 | 5500024024213121906563.H  | .H01.G02.E03.D04.B05.A06 |
| mifepristone         | 33.50335078 | 33.4530122  | 0.050338579 | 622623112706.D03          | .H01.G02.E03.B05.A06     |
| ketorolac            | 37.51018283 | 37.46016387 | 0.050018964 | 5500024030700072107987.G  | .H07.G08.E09.D10.B11.A12 |
| clebopride           | 37.05174494 | 37.00786033 | 0.043884611 | 5500024024213121906563.C  | .H01.G02.E03.D04.B05.A06 |
| triamterene          | 37.6815796  | 37.63864853 | 0.042931074 | 5500024024213121906564.C  | .H07.G08.D10.B11.A12     |
| trifluoperazine      | 37.35502106 | 37.31290545 | 0.042115607 | 5500024035736031208612.D  | .G08.E09.D10.B11.A12     |
| hydralazine          | 33.49987518 | 33.45935203 | 0.040523155 | 5.50E+26                  | .H01.G02.E03.D04.B05.A06 |
| metrifonate          | 37.67890647 | 37.63864853 | 0.040257942 | 5500024024213121906564.G  | .H07.G08.D10.B11.A12     |



|                         |             |             |              |                          |                          |
|-------------------------|-------------|-------------|--------------|--------------------------|--------------------------|
| fluphenazine            | 36.18229365 | 36.14209273 | 0.040200916  | 5500024017802120306174.B | .H01.G02.E03.D04.B05.A06 |
| isocorydine             | 35.12653333 | 35.08636713 | 0.040166202  | 640641112706.A08         | .H07.G08.E09.D10.B11.A12 |
| myosmine                | 35.09823982 | 35.05833814 | 0.039901677  | 5500024024213121906559.B | .H07.G08.E09.D10.B11.A12 |
| 3-acetylcoumarin        | 34.24949016 | 34.21031976 | 0.039170404  | 5.50E+33                 | .H07.G08.E09.D10.B11.A12 |
| ursodeoxycholic acid    | 37.49922226 | 37.46016387 | 0.039058396  | 5500024030700072107987.H | .H07.G08.E09.D10.B11.A12 |
| trichostatin A          | 35.09706913 | 35.05833814 | 0.03873099   | 5500024024213121906559.A | .H07.G08.E09.D10.B11.A12 |
| metolazone              | 35.46472571 | 35.4281341  | 0.036591617  | 612613111306.G12         | .H07.G08.E09.D10.B11.A12 |
| haloperidol             | 34.45755013 | 34.42118584 | 0.036364298  | 5500024030401071707292.A | .H01.G02.E03.D04.B05.A06 |
| capsaicin               | 34.24484799 | 34.21031976 | 0.034528238  | 5500024030760072207028.F | .H07.G08.E09.D10.B11.A12 |
| estrone                 | 37.27777993 | 37.24471367 | 0.033066254  | 5500024030700072107987.G | .H01.G02.E03.D04.B05.A06 |
| fursultiamine           | 34.74070665 | 34.70962788 | 0.031078766  | 5500024030760072207033.C | .H01.G02.E03.D04.B05.A06 |
| ondansetron             | 37.27739586 | 37.24787327 | 0.029522582  | 5500024035736031208612.B | .H01.G02.E03.D04.B05.A06 |
| Prestwick-674           | 35.08619286 | 35.05833814 | 0.027854721  | 5500024024213121906559.F | .H07.G08.E09.D10.B11.A12 |
| zidovudine              | 33.48362879 | 33.45797002 | 0.025658772  | 622623112706.G12         | .H07.G08.E09.D10.B11.A12 |
| tropine                 | 37.27268873 | 37.24787327 | 0.024815455  | 5500024035736031208612.C | .H01.G02.E03.D04.B05.A06 |
| primidone               | 34.23501996 | 34.21031976 | 0.024700205  | 5500024030760072207028.A | .H07.G08.E09.D10.B11.A12 |
| lorglumide              | 37.26870657 | 37.24471367 | 0.023992904  | 5500024030700072107987.F | .H01.G02.E03.D04.B05.A06 |
| 2-aminobenzenesulfo     | 34.23399427 | 34.21031976 | 0.023674518  | 5500024030760072207028.A | .H07.G08.E09.D10.B11.A12 |
| fluorometholone         | 33.98397241 | 33.96076648 | 0.023205937  | 5500024025833041107269.G | .H01.G02.E03.D04.B05.A06 |
| berberine               | 35.10865807 | 35.08636713 | 0.022290941  | 640641112706.C09         | .H07.G08.E09.D10.B11.A12 |
| minoxidil               | 35.2892172  | 35.2669347  | 0.022282493  | 612613111306.B02         | .H01.G02.E03.D04.B05.A06 |
| mevalolactone           | 34.42315898 | 34.40088765 | 0.022271328  | 5500024030401071707292.F | .H07.G08.E09.D10.B11     |
| trimethylcolchicinic ac | 35.04210086 | 35.01997127 | 0.022129595  | 5.50E+26                 | .H01.G02.E03.D04.B05.A06 |
| pepstatin               | 36.86185788 | 36.83996258 | 0.021895302  | 5500024024213121906563.D | .H07.G08.E09.D10.B11.A12 |
| trichostatin A          | 34.23190965 | 34.21031976 | 0.021589897  | 5500024030760072207028.B | .H07.G08.E09.D10.B11.A12 |
| methanthelinium bron    | 37.2678029  | 37.24787327 | 0.019929624  | 5.50E+22                 | .H01.G02.E03.D04.B05.A06 |
| cycloserine             | 37.26720045 | 37.24787327 | 0.019327171  | 5.50E+25                 | .H01.G02.E03.D04.B05.A06 |
| maprotiline             | 33.47645352 | 33.45797002 | 0.018483506  | 622623112706.B10         | .H07.G08.E09.D10.B11.A12 |
| meclocycline            | 36.85802787 | 36.83996258 | 0.018065291  | 5500024024213121906563.B | .H07.G08.E09.D10.B11.A12 |
| tridihethyl             | 34.19222238 | 34.17633596 | 0.015886422  | 5500024030760072207033.D | .H07.G08.E09.D10.B11.A12 |
| erythromycin            | 35.44302583 | 35.4281341  | 0.014891735  | 612613111306.G07         | .H07.G08.E09.D10.B11.A12 |
| proxiphylline           | 37.47284953 | 37.46016387 | 0.012685659  | 5500024030700072107987.F | .H07.G08.E09.D10.B11.A12 |
| fluspirilene            | 37.25736033 | 37.24471367 | 0.012646662  | 5500024030700072107987.D | .H01.G02.E03.D04.B05.A06 |
| pyrantel                | 35.11995936 | 35.10850208 | 0.01145728   | 614615111406.G12         | .H07.G08.E09.D10.B11.A12 |
| betulinic acid          | 36.85141925 | 36.83996258 | 0.011456674  | 5500024024213121906563.A | .H07.G08.E09.D10.B11.A12 |
| econazole               | 33.01104367 | 33.00109826 | 0.009945407  | 5500024024213121906560.D | .H07.G08.E09.D10.B11.A12 |
| pentolonium             | 33.46885093 | 33.45935203 | 0.0094989    | 5500024024213121906560.F | .H01.G02.E03.D04.B05.A06 |
| fusaric acid            | 36.84931595 | 36.83996258 | 0.009353375  | 5500024024213121906563.H | .H07.G08.E09.D10.B11.A12 |
| biotin                  | 35.1638073  | 35.15552717 | 0.008280134  | 5500024024214122006604.G | .H01.G02.E03.D04.A06     |
| hesperidin              | 37.01544172 | 37.00786033 | 0.007581389  | 5500024024213121906563.C | .H01.G02.E03.D04.B05.A06 |
| cefalonium              | 34.71659351 | 34.70962788 | 0.006965625  | 5.50E+27                 | .H01.G02.E03.D04.B05.A06 |
| ketoprofen              | 33.46598399 | 33.45935203 | 0.006631958  | 5500024024213121906560.D | .H01.G02.E03.D04.B05.A06 |
| pregnenolone            | 35.13590816 | 35.13162255 | 0.004285609  | 5500024024214122006604.B | .H07.G08.E09.D10.B11.A12 |
| heptaminol              | 37.64242553 | 37.63864853 | 0.003777     | 5500024024213121906564.B | .H07.G08.D10.B11.A12     |
| chlortalidone           | 33.45621549 | 33.4530122  | 0.003203284  | 622623112706.A01         | .H01.G02.E03.B05.A06     |
| Prestwick-664           | 35.06144086 | 35.05833814 | 0.003102718  | 5500024024213121906559.F | .H07.G08.E09.D10.B11.A12 |
| edrophonium chloride    | 35.43018033 | 35.4281341  | 0.002046233  | 612613111306.F11         | .H07.G08.E09.D10.B11.A12 |
| trichostatin A          | 34.71069717 | 34.70962788 | 0.001069294  | 5500024030760072207033.H | .H01.G02.E03.D04.B05.A06 |
| LY-294002               | 34.94387722 | 34.94387722 | 3.55E-14     | EC2004030503AA           | EC2004030502AA           |
| propidium iodide        | 33.96059986 | 33.96076648 | -0.000166614 | 5500024025833041107269.A | .H01.G02.E03.D04.B05.A06 |
| profenamine             | 34.20986437 | 34.21031976 | -0.000455381 | 5500024030760072207028.F | .H07.G08.E09.D10.B11.A12 |
| digoxigenin             | 34.20845039 | 34.21031976 | -0.001869365 | 5500024030760072207028.B | .H07.G08.E09.D10.B11.A12 |
| LY-294002               | 34.41803608 | 34.42118584 | -0.003149758 | 5500024030401071707292.F | .H01.G02.E03.D04.B05.A06 |
| brinzolamide            | 33.4536162  | 33.45797002 | -0.00435382  | 622623112706.C10         | .H07.G08.E09.D10.B11.A12 |
| finasteride             | 35.0536549  | 35.05833814 | -0.004683239 | 5500024024213121906559.A | .H07.G08.E09.D10.B11.A12 |
| sirolimus               | 34.41625502 | 34.42118584 | -0.004930816 | 5.50E+25                 | .H01.G02.E03.D04.B05.A06 |
| ofloxacin               | 33.45438203 | 33.45935203 | -0.004970003 | 5500024024213121906560.F | .H01.G02.E03.D04.B05.A06 |
| dexibuprofen            | 37.23969399 | 37.24471367 | -0.005019679 | 5500024030700072107987.C | .H01.G02.E03.D04.B05.A06 |
| etofylline              | 35.10324249 | 35.10850208 | -0.005259588 | 614615111406.G07         | .H07.G08.E09.D10.B11.A12 |
| flecainide              | 33.95557119 | 33.96129529 | -0.005724103 | 5500024025833041107269.F | .H07.E09.D10.B11.A12     |
| pipenzolate bromide     | 34.39485568 | 34.40088765 | -0.006031968 | 5.50E+28                 | .H07.G08.E09.D10.B11     |
| altretamine             | 37.23679683 | 37.24471367 | -0.007916842 | 5500024030700072107987.D | .H01.G02.E03.D04.B05.A06 |
| buspirone               | 36.99934596 | 37.00786033 | -0.008514372 | 5.50E+26                 | .H01.G02.E03.D04.B05.A06 |
| oleandomycin            | 35.41934539 | 35.4281341  | -0.008788708 | 612613111306.F10         | .H07.G08.E09.D10.B11.A12 |
| bacampicillin           | 36.83108699 | 36.83996258 | -0.008875591 | 5500024024213121906563.B | .H07.G08.E09.D10.B11.A12 |
| isoniazid               | 34.73763968 | 34.74789333 | -0.010253653 | 614615111406.A01         | .H01.G02.E03.D04.B05.A06 |
| yohimbic acid           | 35.00858615 | 35.01997127 | -0.011385123 | 5.50E+27                 | .H01.G02.E03.D04.B05.A06 |
| iopamidol               | 34.38930678 | 34.40088765 | -0.011580873 | 5500024030401071707292.C | .H07.G08.E09.D10.B11     |
| bergenin                | 34.38777265 | 34.40088765 | -0.013115002 | 5500024030401071707292.D | .H07.G08.E09.D10.B11     |

|                       |             |             |              |                          |                          |
|-----------------------|-------------|-------------|--------------|--------------------------|--------------------------|
| nadolol               | 34.11942898 | 34.13330462 | -0.01387564  | 5500024030760072207028.A | .H01.G02.D04.B05.A06     |
| skimmianine           | 33.94654789 | 33.96076648 | -0.014218588 | 5500024025833041107269.H | .H01.G02.E03.D04.B05.A06 |
| rosiglitazone         | 37.29777222 | 37.31290545 | -0.015133235 | 5500024035736031208612.C | .G08.E09.D10.B11.A12     |
| tiapride              | 33.44420536 | 33.45935203 | -0.015146669 | 5500024024213121906560.H | .H01.G02.E03.D04.B05.A06 |
| bromopride            | 35.04153327 | 35.05833814 | -0.01680487  | 5500024024213121906559.F | .H07.G08.E09.D10.B11.A12 |
| kanamycin             | 33.4397802  | 33.45797002 | -0.018189819 | 622623112706.D09         | .H07.G08.E09.D10.B11.A12 |
| procyclidine          | 34.1146119  | 34.13330462 | -0.018692719 | 5500024030760072207028.G | .H01.G02.D04.B05.A06     |
| haloperidol           | 37.29363558 | 37.31290545 | -0.019269868 | 5500024035736031208612.H | .G08.E09.D10.B11.A12     |
| methylbenzethonium    | 35.03894628 | 35.05833814 | -0.019391857 | 5500024024213121906559.D | .H07.G08.E09.D10.B11.A12 |
| prilocaine            | 33.43888513 | 33.45935203 | -0.020466896 | 5500024024213121906560.D | .H01.G02.E03.D04.B05.A06 |
| picotamide            | 34.72486923 | 34.74789333 | -0.023024102 | 614615111406.D05         | .H01.G02.E03.D04.B05.A06 |
| tubocurarine chloride | 35.08740261 | 35.11129025 | -0.023887639 | 640641112706.C03         | .H01.G02.E03.D04.B05.A06 |
| trichostatin A        | 34.99590333 | 35.01997127 | -0.02406794  | 5500024024213121906559.F | .H01.G02.E03.D04.B05.A06 |
| trimetazidine         | 35.08647252 | 35.11129025 | -0.024817726 | 6.41E+13                 | .H01.G02.E03.D04.B05     |
| lynestrenol           | 35.4029237  | 35.4281341  | -0.025210397 | 612613111306.B07         | .H07.G08.E09.D10.B11.A12 |
| carbarsone            | 36.8146977  | 36.83996258 | -0.025264878 | 5500024024213121906563.G | .H07.G08.E09.D10.B11.A12 |
| flucloxacillin        | 37.43382868 | 37.46016387 | -0.026335186 | 5500024030700072107987.D | .H07.G08.E09.D10.B11.A12 |
| rilmemidine           | 37.43198271 | 37.46016387 | -0.028181156 | 5500024030700072107987.C | .H07.G08.E09.D10.B11.A12 |
| latamoxef             | 34.18058615 | 34.21031976 | -0.029733609 | 5500024030760072207028.H | .H07.G08.E09.D10.B11.A12 |
| triamcinolone         | 34.71772595 | 34.74789333 | -0.03016738  | 614615111406.B01         | .H01.G02.E03.D04.B05.A06 |
| eldeline              | 35.0273913  | 35.05833814 | -0.030946839 | 5500024024213121906559.H | .H07.G08.E09.D10.B11.A12 |
| hydroxyzine           | 35.39649782 | 35.4281341  | -0.031636273 | 6.13E+22                 | .H07.G08.E09.D10.B11.A12 |
| isoxicam              | 37.60632137 | 37.63864853 | -0.032327158 | 5500024024213121906564.C | .H07.G08.D10.B11.A12     |
| mephenesin            | 33.42670707 | 33.45935203 | -0.032644958 | 5500024024213121906560.F | .H01.G02.E03.D04.B05.A06 |
| harpagoside           | 34.67646533 | 34.70962788 | -0.033162552 | 5500024030760072207033.B | .H01.G02.E03.D04.B05.A06 |
| terguride             | 37.21089761 | 37.24471367 | -0.033816065 | 5.50E+23                 | .H01.G02.E03.D04.B05.A06 |
| phenylpropanolamine   | 33.4237992  | 33.45797002 | -0.034170818 | 6.23E+18                 | .H07.G08.E09.D10.B11.A12 |
| perphenazine          | 35.39318626 | 35.4281341  | -0.034947836 | 612613111306.B10         | .H07.G08.E09.D10.B11.A12 |
| bemegride             | 34.17535757 | 34.21031976 | -0.034962183 | 5500024030760072207028.C | .H07.G08.E09.D10.B11.A12 |
| colistin              | 35.09645063 | 35.13162255 | -0.035171921 | 5500024024214122006604.C | .H07.G08.E09.D10.B11.A12 |
| tetracaine            | 35.07438957 | 35.11129025 | -0.036900684 | 640641112706.C04         | .H01.G02.E03.D04.B05     |
| SR-95639A             | 36.80216213 | 36.83996258 | -0.037800448 | 5500024024213121906563.C | .H07.G08.E09.D10.B11.A12 |
| Prestwick-1103        | 34.1373623  | 34.17633596 | -0.038973656 | 5500024030760072207033.A | .H07.G08.E09.B11.A12     |
| enilconazole          | 37.42092909 | 37.46016387 | -0.039234783 | 5500024030700072107987.B | .H07.G08.E09.D10.B11.A12 |
| melatonin             | 35.11596524 | 35.15552717 | -0.03956193  | 5500024024214122006604.F | .H01.G02.E03.D04.A06     |
| trichostatin A        | 37.20663367 | 37.24787327 | -0.041239607 | 5500024035736031208612.D | .H01.G02.E03.D04.B05.A06 |
| cinnarizine           | 33.41174337 | 33.4530122  | -0.041268829 | 622623112706.F03         | .H01.G02.E03.B05.A06     |
| flumetasone           | 33.91983491 | 33.96129529 | -0.041460383 | 5500024025833041107269.G | .H07.E09.D10.B11.A12     |
| dicycloverine         | 35.22532569 | 35.2669347  | -0.041609014 | 6.13E+17                 | .H01.G02.E03.D04.B05.A06 |
| tobramycin            | 35.08951895 | 35.13162255 | -0.042103601 | 5.50E+32                 | .H07.G08.E09.D10.B11.A12 |
| pilocarpine           | 35.11319478 | 35.15552717 | -0.04233239  | 5.50E+23                 | .H01.G02.E03.D04.A06     |
| niflumic acid         | 32.95695377 | 33.00109826 | -0.044144494 | 5500024024213121906560.C | .H07.G08.E09.D10.B11.A12 |
| desoxycortone         | 37.20001594 | 37.24471367 | -0.044697734 | 5500024030700072107987.B | .H01.G02.E03.D04.B05.A06 |
| clozapine             | 36.09730531 | 36.14209273 | -0.044787417 | 5500024017802120306174.C | .H01.G02.E03.D04.B05.A06 |
| lumicolchicine        | 36.79510642 | 36.83996258 | -0.044856158 | 5500024024213121906563.F | .H07.G08.E09.D10.B11.A12 |
| meclizine             | 35.1105889  | 35.15552717 | -0.044938268 | 5500024024214122006604.H | .H01.G02.E03.D04.A06     |
| debrisoquine          | 33.41222845 | 33.45797002 | -0.045741567 | 622623112706.G07         | .H07.G08.E09.D10.B11.A12 |
| pempidine             | 35.01173671 | 35.05833814 | -0.04660143  | 5500024024213121906559.H | .H07.G08.E09.D10.B11.A12 |
| hydrastinine          | 35.0611964  | 35.10850208 | -0.047305676 | 614615111406.B07         | .H07.G08.E09.D10.B11.A12 |
| sulfinpyrazone        | 33.40474931 | 33.4530122  | -0.048262892 | 622623112706.C05         | .H01.G02.E03.B05.A06     |
| dizocilpine           | 34.69936464 | 34.74789333 | -0.048528685 | 614615111406.D03         | .H01.G02.E03.D04.B05.A06 |
| pyrazinamide          | 35.08219943 | 35.13162255 | -0.04942312  | 5.50E+28                 | .H07.G08.E09.D10.B11.A12 |
| cimetidine            | 35.21726909 | 35.2669347  | -0.049665612 | 612613111306.H03         | .H01.G02.E03.D04.B05.A06 |
| cyclizine             | 35.06142202 | 35.11129025 | -0.049868235 | 640641112706.D01         | .H01.G02.E03.D04.B05     |
| loracarbef            | 34.12502085 | 34.17633596 | -0.051315111 | 5500024030760072207033.C | .H07.G08.E09.B11.A12     |
| saquinavir            | 37.19583916 | 37.24787327 | -0.052034119 | 5500024035736031208612.G | .H01.G02.E03.D04.B05.A06 |
| sulfathiazole         | 35.21481057 | 35.2669347  | -0.052124135 | 612613111306.H02         | .H01.G02.E03.D04.B05.A06 |
| protoveratrine A      | 34.9667924  | 35.01997127 | -0.053178869 | 5.50E+23                 | .H01.G02.E03.D04.B05.A06 |
| ioxaglic acid         | 34.1214087  | 34.17633596 | -0.054927256 | 5500024030760072207033.C | .H07.G08.E09.B11.A12     |
| convolamine           | 35.03126923 | 35.08636713 | -0.0550979   | 640641112706.C10         | .H07.G08.E09.D10.B11.A12 |
| ethionamide           | 35.07537299 | 35.13162255 | -0.05624956  | 5500024024214122006604.B | .H07.G08.E09.D10.B11.A12 |
| lobelanidine          | 35.05501755 | 35.11129025 | -0.056272699 | 640641112706.A02         | .H01.G02.E03.D04.B05     |
| colecalfiferol        | 35.09900986 | 35.15552717 | -0.056517305 | 5500024024214122006604.F | .H01.G02.E03.D04.A06     |
| 6-azathymine          | 35.07489135 | 35.13162255 | -0.056731201 | 5500024024214122006604.H | .H07.G08.E09.D10.B11.A12 |
| diperodon             | 33.39589964 | 33.4530122  | -0.057112565 | 622623112706.C06         | .H01.G02.E03.B05.A06     |
| bicuculline           | 34.96244646 | 35.01997127 | -0.057524809 | 5500024024213121906559.F | .H01.G02.E03.D04.B05.A06 |
| tyloxapol             | 37.18340806 | 37.24471367 | -0.061305615 | 5500024030700072107987.G | .H01.G02.E03.D04.B05.A06 |
| fenopropfen           | 33.8992575  | 33.96129529 | -0.061369538 | 5500024025833041107269.G | .H07.E09.D10.B11.A12     |
| tracazolate           | 34.6461178  | 34.70962788 | -0.063510078 | 5.50E+25                 | .H01.G02.E03.D04.B05.A06 |

|                       |             |             |              |                           |                          |
|-----------------------|-------------|-------------|--------------|---------------------------|--------------------------|
| ketotifen             | 33.38912828 | 33.4530122  | -0.063883919 | 622623112706.A03          | .H01.G02.E03.B05.A06     |
| tetroquinone          | 34.06925493 | 34.13330462 | -0.064049685 | 5.50E+22                  | .H01.G02.D04.B05.A06     |
| chlorpromazine        | 36.07800368 | 36.14209273 | -0.064089047 | 5500024017802120306174.FI | .H01.G02.E03.D04.B05.A06 |
| ascorbic acid         | 33.39251764 | 33.45797002 | -0.065452379 | 622623112706.D11          | .H07.G08.E09.D10.B11.A12 |
| testosterone          | 36.94219041 | 37.00786033 | -0.065669915 | 5500024024213121906563.B  | .H01.G02.E03.D04.B05.A06 |
| sulfasalazine         | 35.04555672 | 35.11129025 | -0.065733528 | 640641112706.D03          | .H01.G02.E03.D04.B05     |
| butacaine             | 34.33372104 | 34.40088765 | -0.067166606 | 5500024030401071707292.D  | .H07.G08.E09.D10.B11     |
| lincomycin            | 32.93284678 | 33.00109826 | -0.068251483 | 5500024024213121906560.G  | .H07.G08.E09.D10.B11.A12 |
| indometacin           | 32.93260888 | 33.00109826 | -0.068489382 | 5500024024213121906560.G  | .H07.G08.E09.D10.B11.A12 |
| meprylcaine           | 37.17930633 | 37.24787327 | -0.068566942 | 5500024035736031208612.H  | .H01.G02.E03.D04.B05.A06 |
| kaempferol            | 37.17892291 | 37.24787327 | -0.068950365 | 5500024035736031208612.B  | .H01.G02.E03.D04.B05.A06 |
| xylozine              | 34.95039088 | 35.01997127 | -0.069580391 | 5500024024213121906559.H  | .H01.G02.E03.D04.B05.A06 |
| dantrolene            | 33.38795315 | 33.45935203 | -0.071398883 | 5500024024213121906560.A  | .H01.G02.E03.D04.B05.A06 |
| trichostatin A        | 35.05917398 | 35.13162255 | -0.072448574 | 5500024024214122006604.FI | .H07.G08.E09.D10.B11.A12 |
| sertaconazole         | 37.17256885 | 37.24787327 | -0.075304427 | 5500024035736031208612.G  | .H01.G02.E03.D04.B05.A06 |
| anabasine             | 33.88201118 | 33.96076648 | -0.078755297 | 5500024025833041107269.G  | .H01.G02.E03.D04.B05.A06 |
| (+/-)-catechin        | 34.05073502 | 34.13330462 | -0.082569598 | 5500024030760072207028.C  | .H01.G02.D04.B05.A06     |
| clidinium bromide     | 34.31419324 | 34.40088765 | -0.086694412 | 5500024030401071707292.B  | .H07.G08.E09.D10.B11     |
| pargyline             | 35.02178553 | 35.10850208 | -0.086716544 | 614615111406.F11          | .H07.G08.E09.D10.B11.A12 |
| tomatidine            | 34.99794551 | 35.08636713 | -0.088421614 | 640641112706.H11          | .H07.G08.E09.D10.B11.A12 |
| Prestwick-665         | 34.9692797  | 35.05833814 | -0.089058438 | 5.50E+31                  | .H07.G08.E09.D10.B11.A12 |
| rosiglitazone         | 34.33068292 | 34.42118584 | -0.090502915 | 5500024030401071707292.C  | .H01.G02.E03.D04.B05.A06 |
| alpha-estradiol       | 37.22206246 | 37.31290545 | -0.090842993 | 5500024035736031208612.G  | .G08.E09.D10.B11.A12     |
| racedotril            | 34.99530435 | 35.08636713 | -0.091062782 | 640641112706.B07          | .H07.G08.E09.D10.B11.A12 |
| bethanechol           | 34.08499864 | 34.17633596 | -0.091337317 | 5500024030760072207033.B  | .H07.G08.E09.B11.A12     |
| spaglumic acid        | 34.08358887 | 34.17633596 | -0.092747082 | 5500024030760072207033.D  | .H07.G08.E09.B11.A12     |
| scopolamine N-oxide   | 35.01524555 | 35.10850208 | -0.09325653  | 614615111406.F08          | .H07.G08.E09.D10.B11.A12 |
| trichostatin A        | 34.0830534  | 34.17633596 | -0.093282555 | 5500024030760072207033.G  | .H07.G08.E09.B11.A12     |
| propylthiouracil      | 35.03816644 | 35.13162255 | -0.093456114 | 5500024024214122006604.F  | .H07.G08.E09.D10.B11.A12 |
| midecamycin           | 35.33394023 | 35.4281341  | -0.094193871 | 612613111306.D07          | .H07.G08.E09.D10.B11.A12 |
| bephenium hydroxyn    | 37.1492529  | 37.24471367 | -0.095460766 | 5500024030700072107987.D  | .H01.G02.E03.D04.B05.A06 |
| mesoridazine          | 35.01479435 | 35.11129025 | -0.096495901 | 640641112706.F06          | .H01.G02.E03.D04.B05     |
| L-methionine sulfoxin | 35.03489721 | 35.13162255 | -0.096725339 | 5500024024214122006604.G  | .H07.G08.E09.D10.B11.A12 |
| nipecotinic acid      | 37.35989886 | 37.46016387 | -0.100265011 | 5.50E+28                  | .H07.G08.E09.D10.B11.A12 |
| chlorogenic acid      | 36.73809708 | 36.83996258 | -0.101865497 | 5500024024213121906563.A  | .H07.G08.E09.D10.B11.A12 |
| trichostatin A        | 34.31544814 | 34.42118584 | -0.105737695 | 5500024030401071707292.G  | .H01.G02.E03.D04.B05.A06 |
| promazine             | 34.95211497 | 35.05833814 | -0.106223167 | 5500024024213121906559.G  | .H07.G08.E09.D10.B11.A12 |
| antazoline            | 33.34639035 | 33.4530122  | -0.106621852 | 622623112706.F01          | .H01.G02.E03.B05.A06     |
| amrinone              | 34.29403864 | 34.40088765 | -0.106849012 | 5500024030401071707292.D  | .H07.G08.E09.D10.B11     |
| paromomycin           | 34.02586829 | 34.13330462 | -0.107436326 | 5500024030760072207028.B  | .H01.G02.D04.B05.A06     |
| hydrochlorothiazide   | 35.15907038 | 35.2669347  | -0.107864327 | 612613111306.D05          | .H01.G02.E03.D04.B05.A06 |
| phenazone             | 35.15858827 | 35.2669347  | -0.108346433 | 612613111306.C01          | .H01.G02.E03.D04.B05.A06 |
| benzylamine           | 33.34217576 | 33.4530122  | -0.110836441 | 622623112706.G03          | .H01.G02.E03.B05.A06     |
| dropropizine          | 32.88978885 | 33.00109826 | -0.111309412 | 5500024024213121906560.C  | .H07.G08.E09.D10.B11.A12 |
| pyrithyldione         | 34.28926404 | 34.40088765 | -0.111623613 | 5500024030401071707292.A  | .H07.G08.E09.D10.B11     |
| sulfabenzamide        | 34.90802453 | 35.01997127 | -0.111946737 | 5500024024213121906559.B  | .H01.G02.E03.D04.B05.A06 |
| thiopropazine         | 34.63557815 | 34.74789333 | -0.112315178 | 614615111406.C02          | .H01.G02.E03.D04.B05.A06 |
| aminophylline         | 34.09643693 | 34.21031976 | -0.113882823 | 5500024030760072207028.FI | .H07.G08.E09.D10.B11.A12 |
| Prestwick-967         | 34.59485537 | 34.70962788 | -0.114772509 | 5500024030760072207033.D  | .H01.G02.E03.D04.B05.A06 |
| valproic acid         | 34.30427396 | 34.42118584 | -0.116911879 | 5500024030401071707292.FI | .H01.G02.E03.D04.B05.A06 |
| mepenzolate bromide   | 34.94060932 | 35.05833814 | -0.117728819 | 5500024024213121906559.H  | .H07.G08.E09.D10.B11.A12 |
| pancuronium bromide   | 34.59163714 | 34.70962788 | -0.11799074  | 5500024030760072207033.G  | .H01.G02.E03.D04.B05.A06 |
| conessine             | 34.90181244 | 35.01997127 | -0.118158833 | 5500024024213121906559.G  | .H01.G02.E03.D04.B05.A06 |
| 3-acetamidocoumarin   | 34.58757838 | 34.70962788 | -0.122049504 | 5500024030760072207033.A  | .H01.G02.E03.D04.B05.A06 |
| diethylcarbamazine    | 32.87882631 | 33.00109826 | -0.122271954 | 5500024024213121906560.D  | .H07.G08.E09.D10.B11.A12 |
| simvastatin           | 34.01086392 | 34.13330462 | -0.122440701 | 5.50E+26                  | .H01.G02.D04.B05.A06     |
| brompheniramine       | 36.71667842 | 36.83996258 | -0.123284159 | 5500024024213121906563.C  | .H07.G08.E09.D10.B11.A12 |
| moxisylyte            | 37.51457586 | 37.63864853 | -0.124072669 | 5500024024213121906564.F  | .H07.G08.D10.B11.A12     |
| phthalylsulfathiazole | 34.08534211 | 34.21031976 | -0.124977651 | 5500024030760072207028.G  | .H07.G08.E09.D10.B11.A12 |
| delsoline             | 33.83547083 | 33.96076648 | -0.125295646 | 5500024025833041107269.FI | .H01.G02.E03.D04.B05.A06 |
| sulfamonomethoxine    | 34.27436122 | 34.40088765 | -0.126526431 | 5500024030401071707292.A  | .H07.G08.E09.D10.B11     |
| trimethadione         | 35.00410645 | 35.13162255 | -0.127516108 | 5500024024214122006604.D  | .H07.G08.E09.D10.B11.A12 |
| amodiaquine           | 33.32507519 | 33.4530122  | -0.127937016 | 622623112706.D05          | .H01.G02.E03.B05.A06     |
| bepidil               | 36.87976231 | 37.00786033 | -0.128098021 | 5500024024213121906563.FI | .H01.G02.E03.D04.B05.A06 |
| betulin               | 34.0481478  | 34.17633596 | -0.128188161 | 5500024030760072207033.FI | .H07.G08.E09.B11.A12     |
| Prestwick-857         | 34.00451536 | 34.13330462 | -0.128789253 | 5500024030760072207028.B  | .H01.G02.D04.B05.A06     |
| valproic acid         | 34.29159356 | 34.42118584 | -0.129592273 | 5500024030401071707292.A  | .H01.G02.E03.D04.B05.A06 |
| talampicillin         | 34.0454833  | 34.17633596 | -0.130852651 | 5500024030760072207033.FI | .H07.G08.E09.B11.A12     |
| aciclovir             | 35.29579398 | 35.4281341  | -0.132340115 | 612613111306.A09          | .H07.G08.E09.D10.B11.A12 |

|                        |             |             |              |                          |                          |
|------------------------|-------------|-------------|--------------|--------------------------|--------------------------|
| roxithromycin          | 34.00053214 | 34.13330462 | -0.13277248  | 5500024030760072207028.G | .H01.G02.D04.B05.A06     |
| pralidoxime            | 37.11112982 | 37.24471367 | -0.13358385  | 5500024030700072107987.H | .H01.G02.E03.D04.B05.A06 |
| troglitazone           | 37.17754442 | 37.31290545 | -0.135361033 | 5500024035736031208612.C | .G08.E09.D10.B11.A12     |
| SC-58125               | 35.02595355 | 35.1615202  | -0.135566651 | EC2004073016AA           | EC2004073014AA           |
| sulfamethizole         | 33.82225991 | 33.96076648 | -0.13850657  | 5500024025833041107269.B | .H01.G02.E03.D04.B05.A06 |
| dimenhydrinate         | 32.86170981 | 33.00109826 | -0.139388454 | 5500024024213121906560.C | .H07.G08.E09.D10.B11.A12 |
| acacetin               | 34.91883414 | 35.05833814 | -0.139504    | 5500024024213121906559.D | .H07.G08.E09.D10.B11.A12 |
| pheniramine            | 35.12713499 | 35.2669347  | -0.139799719 | 612613111306.C04         | .H01.G02.E03.D04.B05.A06 |
| sulmazole              | 34.88000673 | 35.01997127 | -0.139964539 | 5500024024213121906559.C | .H01.G02.E03.D04.B05.A06 |
| tolmetin               | 33.99297122 | 34.13330462 | -0.140333399 | 5500024030760072207028.C | .H01.G02.D04.B05.A06     |
| etifenin               | 34.99099508 | 35.13162255 | -0.140627472 | 5500024024214122006604.F | .H07.G08.E09.D10.B11.A12 |
| metacycline            | 34.56748089 | 34.70962788 | -0.142146989 | 5500024030760072207033.H | .H01.G02.E03.D04.B05.A06 |
| ciprofloxacin          | 35.2858149  | 35.4281341  | -0.142319199 | 6.142319199              | .H07.G08.E09.D10.B11.A12 |
| propofol               | 34.06510768 | 34.21031976 | -0.145212072 | 5500024030760072207028.D | .H07.G08.E09.D10.B11.A12 |
| selegiline             | 34.98361077 | 35.13162255 | -0.148011788 | 5500024024214122006604.H | .H07.G08.E09.D10.B11.A12 |
| palmatine              | 34.87189502 | 35.01997127 | -0.148076253 | 5500024024213121906559.F | .H01.G02.E03.D04.B05.A06 |
| fipexide               | 33.30459395 | 33.4530122  | -0.148418256 | 622623112706.F05         | .H01.G02.E03.B05.A06     |
| trioxysalen            | 33.81130935 | 33.96076648 | -0.149457126 | 5500024025833041107269.F | .H01.G02.E03.D04.B05.A06 |
| estradiol              | 35.9921818  | 36.14209273 | -0.149910925 | 5500024017802120306174.A | .H01.G02.E03.D04.B05.A06 |
| droperidol             | 36.85728516 | 37.00786033 | -0.150575167 | 5500024024213121906563.C | .H01.G02.E03.D04.B05.A06 |
| molindone              | 34.55820532 | 34.70962788 | -0.151422557 | 5.50E+22                 | .H01.G02.E03.D04.B05.A06 |
| ampicillin             | 35.27599959 | 35.4281341  | -0.15213451  | 612613111306.D12         | .H07.G08.E09.D10.B11.A12 |
| chlorcyclizine         | 34.9061437  | 35.05833814 | -0.152194444 | 5500024024213121906559.C | .H07.G08.E09.D10.B11.A12 |
| diclofenamide          | 34.0567124  | 34.21031976 | -0.153607357 | 5500024030760072207028.H | .H07.G08.E09.D10.B11.A12 |
| mefloquine             | 34.59395921 | 34.74789333 | -0.153934117 | 614615111406.H03         | .H01.G02.E03.D04.B05.A06 |
| famotidine             | 35.27026367 | 35.4281341  | -0.157870429 | 612613111306.D11         | .H07.G08.E09.D10.B11.A12 |
| hydrastine hydrochlor  | 34.95188004 | 35.11129025 | -0.159410207 | 640641112706.C05         | .H01.G02.E03.D04.B05     |
| lomefloxacin           | 33.29557725 | 33.45935203 | -0.163774778 | 5.50E+25                 | .H01.G02.E03.D04.B05.A06 |
| oxetacaine             | 35.10311129 | 35.2669347  | -0.163823417 | 612613111306.D01         | .H01.G02.E03.D04.B05.A06 |
| idazoxan               | 37.08052691 | 37.24471367 | -0.164186759 | 5500024030700072107987.D | .H01.G02.E03.D04.B05.A06 |
| dihydrostreptomycin    | 34.58161734 | 34.74789333 | -0.166275993 | 614615111406.C03         | .H01.G02.E03.D04.B05.A06 |
| iobenguane             | 34.94493689 | 35.11129025 | -0.16635336  | 6.41E+16                 | .H01.G02.E03.D04.B05     |
| carbamazepine          | 37.47138203 | 37.63864853 | -0.167266499 | 5500024024213121906564.F | .H07.G08.D10.B11.A12     |
| ornidazole             | 34.94045329 | 35.10850208 | -0.168048782 | 614615111406.D07         | .H07.G08.E09.D10.B11.A12 |
| Prestwick-1085         | 37.07882914 | 37.24787327 | -0.169044137 | 5500024035736031208612.F | .H01.G02.E03.D04.B05.A06 |
| mefexamide             | 34.93684519 | 35.10850208 | -0.171656883 | 614615111406.B09         | .H07.G08.E09.D10.B11.A12 |
| physostigmine          | 34.91437446 | 35.08636713 | -0.171992668 | 640641112706.C07         | .H07.G08.E09.D10.B11.A12 |
| pizotifen              | 37.28740369 | 37.46016387 | -0.172760181 | 5500024030700072107987.C | .H07.G08.E09.D10.B11.A12 |
| trichostatin A         | 37.13814641 | 37.31290545 | -0.174759045 | 5500024035736031208612.G | .G08.E09.D10.B11.A12     |
| flucytosine            | 37.06959475 | 37.24471367 | -0.175118916 | 5500024030700072107987.G | .H01.G02.E03.D04.B05.A06 |
| Prestwick-864          | 33.95782095 | 34.13330462 | -0.175483662 | 5500024030760072207028.F | .H01.G02.D04.B05.A06     |
| tiratricol             | 34.93062786 | 35.10850208 | -0.177874211 | 614615111406.G11         | .H07.G08.E09.D10.B11.A12 |
| pirenzepine            | 34.56779829 | 34.74789333 | -0.180095036 | 614615111406.D06         | .H01.G02.E03.D04.B05.A06 |
| LY-294002              | 34.23999279 | 34.42118584 | -0.181193047 | 5500024030401071707292.B | .H01.G02.E03.D04.B05.A06 |
| butirosin              | 33.77693419 | 33.96076648 | -0.18383229  | 5500024025833041107269.F | .H01.G02.E03.D04.B05.A06 |
| methazolamide          | 34.21676288 | 34.40088765 | -0.184124772 | 5500024030401071707292.C | .H07.G08.E09.D10.B11     |
| pentamidine            | 34.94481375 | 35.13162255 | -0.186808806 | 5500024024214122006604.F | .H07.G08.E09.D10.B11.A12 |
| articaïne              | 37.27280565 | 37.46016387 | -0.187358215 | 5500024030700072107987.B | .H07.G08.E09.D10.B11.A12 |
| alvespimycin           | 37.12059947 | 37.31290545 | -0.192305978 | 5500024035736031208612.F | .G08.E09.D10.B11.A12     |
| oxantel                | 36.81449914 | 37.00786033 | -0.193361191 | 5500024024213121906563.F | .H01.G02.E03.D04.B05.A06 |
| ticarcillin            | 37.05436916 | 37.24787327 | -0.193504119 | 5500024035736031208612.D | .H01.G02.E03.D04.B05.A06 |
| pyrimethamine          | 35.07070664 | 35.2669347  | -0.196228065 | 612613111306.F02         | .H01.G02.E03.D04.B05.A06 |
| chlorpromazine         | 37.11652481 | 37.31290545 | -0.196380639 | 5500024035736031208612.F | .G08.E09.D10.B11.A12     |
| tacrine                | 36.81067444 | 37.00786033 | -0.197185895 | 5500024024213121906563.F | .H01.G02.E03.D04.B05.A06 |
| levopropoxyphene       | 33.978593   | 34.17633596 | -0.197742956 | 5500024030760072207033.A | .H07.G08.E09.B11.A12     |
| 1,5-isoquinolinediol   | 34.96314706 | 35.1615202  | -0.198373145 | EC2004073017AA           | EC2004073014AA           |
| N-acetyl-L-aspartic ac | 36.64112699 | 36.83996258 | -0.198835584 | 5500024024213121906563.D | .H07.G08.E09.D10.B11.A12 |
| etamsylate             | 34.51071178 | 34.70962788 | -0.198916104 | 5500024030760072207033.F | .H01.G02.E03.D04.B05.A06 |
| indapamide             | 33.26021853 | 33.45935203 | -0.199133498 | 5500024024213121906560.B | .H01.G02.E03.D04.B05.A06 |
| fulvestrant            | 37.11259634 | 37.31290545 | -0.200309113 | 5500024035736031208612.H | .G08.E09.D10.B11.A12     |
| zomepirac              | 34.19851769 | 34.40088765 | -0.202369955 | 5500024030401071707292.F | .H07.G08.E09.D10.B11     |
| levodopa               | 35.06256    | 35.2669347  | -0.204374703 | 612613111306.G06         | .H01.G02.E03.D04.B05.A06 |
| dehydrocholic acid     | 35.22232082 | 35.4281341  | -0.205813282 | 6.13E+21                 | .H07.G08.E09.D10.B11.A12 |
| atractyloside          | 33.75471287 | 33.96129529 | -0.206582423 | 5500024025833041107269.B | .H07.E09.D10.B11.A12     |
| benzthiazide           | 33.9260692  | 34.13330462 | -0.207235413 | 5500024030760072207028.G | .H01.G02.D04.B05.A06     |
| alimemazine            | 34.19338782 | 34.40088765 | -0.207499824 | 5500024030401071707292.B | .H07.G08.E09.D10.B11     |
| promethazine           | 37.03658839 | 37.24471367 | -0.208125283 | 5500024030700072107987.B | .H01.G02.E03.D04.B05.A06 |
| tropicamide            | 33.2501084  | 33.45935203 | -0.209243629 | 5.50E+23                 | .H01.G02.E03.D04.B05.A06 |
| dexpanthenol           | 37.42851792 | 37.63864853 | -0.210130604 | 5500024024213121906564.F | .H07.G08.D10.B11.A12     |

|                      |             |             |              |                          |                          |
|----------------------|-------------|-------------|--------------|--------------------------|--------------------------|
| doxylamine           | 35.05660704 | 35.2669347  | -0.210327668 | 612613111306.F01         | .H01.G02.E03.D04.B05.A06 |
| bacitracin           | 37.24884459 | 37.46016387 | -0.211319279 | 5500024030700072107987.H | .H07.G08.E09.D10.B11.A12 |
| esculetin            | 37.24882544 | 37.46016387 | -0.211338427 | 5500024030700072107987.F | .H07.G08.E09.D10.B11.A12 |
| sirolimus            | 34.20969878 | 34.42118584 | -0.211487055 | 5500024030401071707292.A | .H01.G02.E03.D04.B05.A06 |
| terguride            | 37.0314847  | 37.24471367 | -0.21322897  | 5500024030700072107987.C | .H01.G02.E03.D04.B05.A06 |
| betaxolol            | 33.24326526 | 33.45797002 | -0.214704753 | 622623112706.G09         | .H07.G08.E09.D10.B11.A12 |
| guaifenesin          | 33.74627096 | 33.96129529 | -0.215024333 | 5500024025833041107269.C | .H07.E09.D10.B11.A12     |
| khellin              | 35.05157545 | 35.2669347  | -0.215359252 | 612613111306.A05         | .H01.G02.E03.D04.B05.A06 |
| vincamine            | 33.24327295 | 33.45935203 | -0.216079075 | 5500024024213121906560.A | .H01.G02.E03.D04.B05.A06 |
| resveratrol          | 34.89512015 | 35.11129025 | -0.216170097 | 640641112706.G01         | .H01.G02.E03.D04.B05     |
| meropenem            | 37.03023977 | 37.24787327 | -0.217633509 | 5.50E+27                 | .H01.G02.E03.D04.B05.A06 |
| fluphenazine         | 34.20282426 | 34.42118584 | -0.218361572 | 5500024030401071707292.B | .H01.G02.E03.D04.B05.A06 |
| oxolamine            | 33.91467484 | 34.13330462 | -0.218629778 | 5500024030760072207028.D | .H01.G02.D04.B05.A06     |
| bisacodyl            | 34.93662371 | 35.15552717 | -0.218903458 | 5500024024214122006604.F | .H01.G02.E03.D04.A06     |
| prochlorperazine     | 36.78787887 | 37.00786033 | -0.219981463 | 5500024024213121906563.D | .H01.G02.E03.D04.B05.A06 |
| digoxin              | 34.9322808  | 35.15552717 | -0.223246366 | 5500024024214122006604.H | .H01.G02.E03.D04.A06     |
| etofenamate          | 34.48570743 | 34.70962788 | -0.223920453 | 5500024030760072207033.G | .H01.G02.E03.D04.B05.A06 |
| theophylline         | 33.90936263 | 34.13330462 | -0.223941985 | 5500024030760072207028.H | .H01.G02.D04.B05.A06     |
| Prestwick-675        | 34.83049714 | 35.05833814 | -0.227840996 | 5.50E+32                 | .H07.G08.E09.D10.B11.A12 |
| alpha-estradiol      | 34.19329469 | 34.42118584 | -0.227891147 | 5500024030401071707292.G | .H01.G02.E03.D04.B05.A06 |
| fenbufen             | 33.23046029 | 33.45935203 | -0.228891741 | 5.50E+22                 | .H01.G02.E03.D04.B05.A06 |
| piroxicam            | 34.87911037 | 35.10850208 | -0.229391702 | 614615111406.H09         | .H07.G08.E09.D10.B11.A12 |
| progesterone         | 34.92611883 | 35.15552717 | -0.229408338 | 5500024024214122006604.H | .H01.G02.E03.D04.A06     |
| hydroflumethiazide   | 37.40568287 | 37.63864853 | -0.232965658 | 5.50E+31                 | .H07.G08.D10.B11.A12     |
| chlormezanone        | 33.22463911 | 33.45797002 | -0.23333091  | 622623112706.B09         | .H07.G08.E09.D10.B11.A12 |
| pentoxyverine        | 36.77296958 | 37.00786033 | -0.234890751 | 5500024024213121906563.G | .H01.G02.E03.D04.B05.A06 |
| piromidic acid       | 33.89833615 | 34.13330462 | -0.234968464 | 5500024030760072207028.F | .H01.G02.D04.B05.A06     |
| niridazole           | 34.91975529 | 35.15552717 | -0.235771879 | 5.50E+26                 | .H01.G02.E03.D04.A06     |
| quinisocaine         | 34.78391123 | 35.01997127 | -0.236060042 | 5500024024213121906559.D | .H01.G02.E03.D04.B05.A06 |
| dexpropranolol       | 37.00784484 | 37.24787327 | -0.240028437 | 5500024035736031208612.G | .H01.G02.E03.D04.B05.A06 |
| quercetin            | 34.89044508 | 35.13162255 | -0.241177472 | 5500024024214122006604.A | .H07.G08.E09.D10.B11.A12 |
| cantharidin          | 37.00250182 | 37.24471367 | -0.242211855 | 5500024030700072107987.F | .H01.G02.E03.D04.B05.A06 |
| furaltadone          | 33.71809197 | 33.96129529 | -0.243203317 | 5500024025833041107269.F | .H07.E09.D10.B11.A12     |
| iopromide            | 34.15753803 | 34.40088765 | -0.243349618 | 5500024030401071707292.A | .H07.G08.E09.D10.B11     |
| miconazole           | 35.02340337 | 35.2669347  | -0.243531334 | 612613111306.F05         | .H01.G02.E03.D04.B05.A06 |
| sulfachlorpyridazine | 34.81262612 | 35.05833814 | -0.245712021 | 5500024024213121906559.D | .H07.G08.E09.D10.B11.A12 |
| trichostatin A       | 34.83798273 | 35.08636713 | -0.248384394 | 640641112706.B10         | .H07.G08.E09.D10.B11.A12 |
| sulfaguandinine      | 35.01744272 | 35.2669347  | -0.249491986 | 612613111306.B01         | .H01.G02.E03.D04.B05.A06 |
| harman               | 34.77035833 | 35.01997127 | -0.249612936 | 5500024024213121906559.D | .H01.G02.E03.D04.B05.A06 |
| nitrofurantoin       | 33.20886067 | 33.45935203 | -0.250491358 | 5500024024213121906560.F | .H01.G02.E03.D04.B05.A06 |
| aztreonam            | 34.85781011 | 35.10850208 | -0.250691965 | 614615111406.C12         | .H07.G08.E09.D10.B11.A12 |
| gibberellic acid     | 34.45713904 | 34.70962788 | -0.25248884  | 5500024030760072207033.G | .H01.G02.E03.D04.B05.A06 |
| zoxazolamine         | 36.75509387 | 37.00786033 | -0.252766456 | 5500024024213121906563.G | .H01.G02.E03.D04.B05.A06 |
| azlocillin           | 34.14428487 | 34.40088765 | -0.25660278  | 5500024030401071707292.D | .H07.G08.E09.D10.B11     |
| moxonidine           | 34.45287065 | 34.70962788 | -0.256757231 | 5500024030760072207033.D | .H01.G02.E03.D04.B05.A06 |
| meticrane            | 37.37884146 | 37.63864853 | -0.259807065 | 5500024024213121906564.H | .H07.G08.D10.B11.A12     |
| etidronic acid       | 33.8724712  | 34.13330462 | -0.260833419 | 5500024030760072207028.H | .H01.G02.D04.B05.A06     |
| guanfacine           | 36.7462256  | 37.00786033 | -0.261634733 | 5.50E+22                 | .H01.G02.E03.D04.B05.A06 |
| trichostatin A       | 35.0009978  | 35.2669347  | -0.265936908 | 612613111306.G05         | .H01.G02.E03.D04.B05.A06 |
| orphenadrine         | 33.19308114 | 33.45935203 | -0.266270892 | 5500024024213121906560.C | .H01.G02.E03.D04.B05.A06 |
| nifurtimox           | 34.44224034 | 34.70962788 | -0.267387544 | 5500024030760072207033.G | .H01.G02.E03.D04.B05.A06 |
| sparteine            | 34.75116839 | 35.01997127 | -0.268802883 | 5500024024213121906559.G | .H01.G02.E03.D04.B05.A06 |
| amiprilose           | 33.86250501 | 34.13330462 | -0.27079961  | 5.50E+23                 | .H01.G02.D04.B05.A06     |
| estradiol            | 36.7363699  | 37.00786033 | -0.271490428 | 5500024024213121906563.B | .H01.G02.E03.D04.B05.A06 |
| glycopyrronium bromi | 33.68783247 | 33.96129529 | -0.27346282  | 5500024025833041107269.D | .H07.E09.D10.B11.A12     |
| eucatorpine          | 33.6860598  | 33.96129529 | -0.275235486 | 5500024025833041107269.F | .H07.E09.D10.B11.A12     |
| bendroflumethiazide  | 33.68380822 | 33.96129529 | -0.277487065 | 5500024025833041107269.F | .H07.E09.D10.B11.A12     |
| liothyronine         | 33.85524931 | 34.13330462 | -0.278055304 | 5500024030760072207028.H | .H01.G02.D04.B05.A06     |
| natamycin            | 36.96969994 | 37.24787327 | -0.278173332 | 5500024035736031208612.H | .H01.G02.E03.D04.B05.A06 |
| aminocaproic acid    | 37.18195332 | 37.46016387 | -0.27821055  | 5.50E+29                 | .H07.G08.E09.D10.B11.A12 |
| nisoxetine           | 37.18140438 | 37.46016387 | -0.278759484 | 5500024030700072107987.F | .H07.G08.E09.D10.B11.A12 |
| dioxybenzone         | 36.9654051  | 37.24471367 | -0.279308575 | 5500024030700072107987.B | .H01.G02.E03.D04.B05.A06 |
| roxarsone            | 33.89411256 | 34.17633596 | -0.282223396 | 5500024030760072207033.G | .H07.G08.E09.D10.B11.A12 |
| carisoprodol         | 36.55405103 | 36.83996258 | -0.285911544 | 5500024024213121906563.G | .H07.G08.E09.D10.B11.A12 |
| aminohippuric acid   | 36.95729557 | 37.24471367 | -0.287418098 | 5500024030700072107987.F | .H01.G02.E03.D04.B05.A06 |
| lisinopril           | 32.71242183 | 33.00109826 | -0.288676436 | 5500024024213121906560.H | .H07.G08.E09.D10.B11.A12 |
| metformin            | 37.3473092  | 37.63864853 | -0.291339327 | 5500024024213121906564.D | .H07.G08.D10.B11.A12     |
| drofenone            | 34.10829735 | 34.40088765 | -0.2925903   | 5500024030401071707292.F | .H07.G08.E09.D10.B11     |
| ethisterone          | 33.16535665 | 33.45935203 | -0.293995377 | 5500024024213121906560.A | .H01.G02.E03.D04.B05.A06 |

|                      |             |             |              |                          |                          |
|----------------------|-------------|-------------|--------------|--------------------------|--------------------------|
| oxybutynin           | 33.15679555 | 33.4530122  | -0.296216648 | 622623112706.G01         | .H01.G02.E03.B05.A06     |
| furazolidone         | 33.83597628 | 34.13330462 | -0.297328339 | 5500024030760072207028.A | .H01.G02.D04.B05.A06     |
| depropine            | 37.16104221 | 37.46016387 | -0.299121661 | 5500024030700072107987.A | .H07.G08.E09.D10.B11.A12 |
| trichostatin A       | 37.15982442 | 37.46016387 | -0.300339444 | 5500024030700072107987.G | .H07.G08.E09.D10.B11.A12 |
| loperamide           | 35.12205899 | 35.4281341  | -0.306075108 | 612613111306.C09         | .H07.G08.E09.D10.B11.A12 |
| Prestwick-984        | 34.40089176 | 34.70962788 | -0.308736123 | 5500024030760072207033.H | .H01.G02.E03.D04.B05.A06 |
| propranolol          | 33.90035856 | 34.21031976 | -0.309961201 | 5500024030760072207028.B | .H07.G08.E09.D10.B11.A12 |
| denatonium benzoate  | 37.1480139  | 37.46016387 | -0.312149964 | 5.50E+31                 | .H07.G08.E09.D10.B11.A12 |
| solasodine           | 34.74483395 | 35.05833814 | -0.313504189 | 5500024024213121906559.H | .H07.G08.E09.D10.B11.A12 |
| phentolamine         | 33.14338365 | 33.45935203 | -0.315968376 | 5500024024213121906560.B | .H01.G02.E03.D04.B05.A06 |
| bufloxedil           | 36.52345469 | 36.83996258 | -0.31650789  | 5500024024213121906563.B | .H07.G08.E09.D10.B11.A12 |
| clomifene            | 36.69070222 | 37.00786033 | -0.31715811  | 5500024024213121906563.G | .H01.G02.E03.D04.B05.A06 |
| heliotrine           | 34.73632539 | 35.05833814 | -0.322012751 | 5500024024213121906559.F | .H07.G08.E09.D10.B11.A12 |
| felbinac             | 33.88561977 | 34.21031976 | -0.324699986 | 5500024030760072207028.A | .H07.G08.E09.D10.B11.A12 |
| ciclosporin          | 36.51302164 | 36.83996258 | -0.326940943 | 5500024024213121906563.C | .H07.G08.E09.D10.B11.A12 |
| lymecycline          | 33.84880532 | 34.17633596 | -0.327530639 | 5500024030760072207033.F | .H07.G08.E09.B11.A12     |
| canavanine           | 34.69207838 | 35.01997127 | -0.327892886 | 5500024024213121906559.F | .H01.G02.E03.D04.B05.A06 |
| lidocaine            | 34.93703463 | 35.2669347  | -0.329900073 | 612613111306.B06         | .H01.G02.E03.D04.B05.A06 |
| ouabain              | 36.67557531 | 37.00786033 | -0.332285022 | 5500024024213121906563.A | .H01.G02.E03.D04.B05.A06 |
| chloramphenicol      | 37.30591632 | 37.63864853 | -0.332732213 | 5500024024213121906564.H | .H07.G08.D10.B11.A12     |
| trichostatin A       | 36.67357514 | 37.00786033 | -0.334285189 | 5500024024213121906563.D | .H01.G02.E03.D04.B05.A06 |
| LY-294002            | 36.97836664 | 37.31290545 | -0.334538813 | 5500024035736031208612.F | .G08.E09.D10.B11.A12     |
| doxycycline          | 34.0653892  | 34.40088765 | -0.335498445 | 5500024030401071707292.B | .H07.G08.E09.D10.B11     |
| progylmide           | 33.12330898 | 33.45935203 | -0.336043046 | 5500024024213121906559.B | .H01.G02.E03.D04.B05.A06 |
| benzamil             | 34.72211854 | 35.05833814 | -0.336219603 | 5500024024213121906559.B | .H07.G08.E09.D10.B11.A12 |
| tiabendazole         | 34.793074   | 35.13162255 | -0.338548553 | 5.50E+29                 | .H07.G08.E09.D10.B11.A12 |
| kawain               | 33.11947988 | 33.45935203 | -0.339872153 | 5500024024213121906560.G | .H01.G02.E03.D04.B05.A06 |
| halofantrine         | 37.11953012 | 37.46016387 | -0.340633745 | 5500024030700072107987.D | .H07.G08.E09.D10.B11.A12 |
| epirizole            | 37.29636492 | 37.63864853 | -0.342283613 | 5500024024213121906564.F | .H07.G08.D10.B11.A12     |
| Chicago Sky Blue 6B  | 36.49611758 | 36.83996258 | -0.343844999 | 5500024024213121906563.D | .H07.G08.E09.D10.B11.A12 |
| imipenem             | 34.7664686  | 35.11129025 | -0.344821649 | 640641112706.F05         | .H01.G02.E03.D04.B05     |
| amprolium            | 34.92157098 | 35.2669347  | -0.345363724 | 6.13E+12                 | .H01.G02.E03.D04.B05.A06 |
| acetylsalicylic acid | 36.96199131 | 37.31290545 | -0.350914141 | 5500024035736031208612.H | .G08.E09.D10.B11.A12     |
| cloxacillin          | 34.75750575 | 35.10850208 | -0.350996329 | 614615111406.A09         | .H07.G08.E09.D10.B11.A12 |
| trichostatin A       | 34.75440601 | 35.10850208 | -0.354096064 | 6.15E+19                 | .H07.G08.E09.D10.B11.A12 |
| midodrine            | 34.39368705 | 34.74789333 | -0.354206279 | 614615111406.A05         | .H01.G02.E03.D04.B05.A06 |
| diltiazem            | 35.07338808 | 35.4281341  | -0.354746013 | 612613111306.C08         | .H07.G08.E09.D10.B11.A12 |
| LY-294002            | 36.95787404 | 37.31290545 | -0.355031407 | 5500024035736031208612.B | .G08.E09.D10.B11.A12     |
| sitosterol           | 34.35409907 | 34.70962788 | -0.355528814 | 5500024030760072207033.F | .H01.G02.E03.D04.B05.A06 |
| trichostatin A       | 34.75370482 | 35.11129025 | -0.357585432 | 640641112706.D02         | .H01.G02.E03.D04.B05     |
| cefotaxime           | 34.38400123 | 34.74789333 | -0.363892103 | 614615111406.C01         | .H01.G02.E03.D04.B05.A06 |
| diloxanide           | 33.84486409 | 34.21031976 | -0.365455667 | 5500024030760072207028.A | .H07.G08.E09.D10.B11.A12 |
| meclofenamic acid    | 34.74188851 | 35.10850208 | -0.366613569 | 614615111406.A11         | .H07.G08.E09.D10.B11.A12 |
| proscillaridin       | 34.34077882 | 34.70962788 | -0.368849062 | 5.50E+26                 | .H01.G02.E03.D04.B05.A06 |
| sulfaquinolaxaline   | 33.59180214 | 33.96076648 | -0.36896434  | 5500024025833041107269.D | .H01.G02.E03.D04.B05.A06 |
| josamycin            | 35.05567715 | 35.4281341  | -0.372456952 | 612613111306.C10         | .H07.G08.E09.D10.B11.A12 |
| Prestwick-1084       | 36.87232086 | 37.24787327 | -0.375552414 | 5500024035736031208612.H | .H01.G02.E03.D04.B05.A06 |
| dicoumarol           | 33.57948872 | 33.96129529 | -0.381806568 | 5.50E+33                 | .H07.E09.D10.B11.A12     |
| sulfamethoxazole     | 33.07656102 | 33.45935203 | -0.38279101  | 5500024024213121906560.H | .H01.G02.E03.D04.B05.A06 |
| novobiocin           | 33.75035785 | 34.13330462 | -0.382946763 | 5500024030760072207028.G | .H01.G02.D04.B05.A06     |
| pentetic acid        | 33.82655991 | 34.21031976 | -0.383759841 | 5500024030760072207028.D | .H07.G08.E09.D10.B11.A12 |
| metronidazole        | 34.8823267  | 35.2669347  | -0.384608008 | 612613111306.A04         | .H01.G02.E03.D04.B05.A06 |
| decamethonium brom   | 34.32476269 | 34.70962788 | -0.38486519  | 5500024030760072207033.B | .H01.G02.E03.D04.B05.A06 |
| valproic acid        | 34.0352853  | 34.42118584 | -0.385900535 | 5.50E+26                 | .H01.G02.E03.D04.B05.A06 |
| pivmecillinam        | 33.79033351 | 34.17633596 | -0.386002446 | 5500024030760072207033.B | .H07.G08.E09.B11.A12     |
| valproic acid        | 36.92306498 | 37.31290545 | -0.389840047 | 5.50E+32                 | .G08.E09.D10.B11.A12     |
| carbinoxamine        | 34.01052542 | 34.40088765 | -0.390362233 | 5500024030401071707292.D | .H07.G08.E09.D10.B11     |
| diflorasone          | 34.62349094 | 35.01997127 | -0.396480325 | 5500024024213121906559.F | .H01.G02.E03.D04.B05.A06 |
| tocainide            | 34.31297453 | 34.70962788 | -0.396653354 | 5500024030760072207033.C | .H01.G02.E03.D04.B05.A06 |
| trichostatin A       | 35.02689515 | 35.4281341  | -0.401238946 | 612613111306.C11         | .H07.G08.E09.D10.B11.A12 |
| ebselen              | 33.99673574 | 34.40088765 | -0.404151912 | 5500024030401071707292.F | .H07.G08.E09.D10.B11     |
| ginkgolide A         | 36.43321091 | 36.83996258 | -0.406751668 | 5.50E+32                 | .H07.G08.E09.D10.B11.A12 |
| torasemide           | 33.76889588 | 34.17633596 | -0.407440078 | 5500024030760072207033.F | .H07.G08.E09.B11.A12     |
| trifluoperazine      | 32.59096302 | 33.00109826 | -0.410135242 | 5.50E+31                 | .H07.G08.E09.D10.B11.A12 |
| bromperidol          | 34.69770013 | 35.11129025 | -0.413590117 | 640641112706.F04         | .H01.G02.E03.D04.B05     |
| pridinol             | 33.98196236 | 34.40088765 | -0.418925291 | 5500024030401071707292.F | .H07.G08.E09.D10.B11     |
| cefotetan            | 36.41761351 | 36.83996258 | -0.422349068 | 5500024024213121906563.F | .H07.G08.E09.D10.B11.A12 |
| chlormpromazine      | 33.99700466 | 34.42118584 | -0.424181178 | 5500024030401071707292.F | .H01.G02.E03.D04.B05.A06 |
| lisuride             | 35.00227256 | 35.4281341  | -0.425861536 | 612613111306.A11         | .H07.G08.E09.D10.B11.A12 |

|                        |             |             |              |                           |                          |
|------------------------|-------------|-------------|--------------|---------------------------|--------------------------|
| flvoxamine             | 34.28301494 | 34.70962788 | -0.426612945 | 5500024030760072207033.FI | .H01.G02.E03.D04.B05.A06 |
| aconitine              | 34.65720032 | 35.08636713 | -0.429166808 | 640641112706.B09          | .H07.G08.E09.D10.B11.A12 |
| pentoxifylline         | 34.67524653 | 35.10850208 | -0.433255543 | 614615111406.A10          | .H07.G08.E09.D10.B11.A12 |
| oxprenolol             | 36.81323908 | 37.24787327 | -0.434634199 | 5500024035736031208612.D  | .H01.G02.E03.D04.B05.A06 |
| atovaquone             | 34.69634873 | 35.13162255 | -0.435273827 | 5.50E+31                  | .H07.G08.E09.D10.B11.A12 |
| tolfenamic acid        | 34.67171275 | 35.10850208 | -0.436789324 | 614615111406.B08          | .H07.G08.E09.D10.B11.A12 |
| fenspiram              | 34.67046029 | 35.10850208 | -0.438041783 | 6.15E+21                  | .H07.G08.E09.D10.B11.A12 |
| nefopam                | 33.02105908 | 33.45935203 | -0.438292952 | 5500024024213121906560.D  | .H01.G02.E03.D04.B05.A06 |
| lasalocid              | 33.69488816 | 34.13330462 | -0.438416459 | 5500024030760072207028.A  | .H01.G02.D04.B05.A06     |
| antimycin A            | 34.66740049 | 35.10850208 | -0.441101589 | 614615111406.F07          | .H07.G08.E09.D10.B11.A12 |
| cefuroxime             | 33.51728164 | 33.96076648 | -0.44348484  | 5500024025833041107269.D  | .H01.G02.E03.D04.B05.A06 |
| clotrimazole           | 33.00008867 | 33.4530122  | -0.452923531 | 622623112706.H05          | .H01.G02.E03.B05.A06     |
| trichostatin A         | 36.385786   | 36.83996258 | -0.454176577 | 5500024024213121906563.H  | .H07.G08.E09.D10.B11.A12 |
| cefaclor               | 34.67470972 | 35.13162255 | -0.456912835 | 5500024024214122006604.D  | .H07.G08.E09.D10.B11.A12 |
| allantoin              | 37.18005661 | 37.63864853 | -0.458591919 | 5500024024213121906564.G  | .H07.G08.D10.B11.A12     |
| dl-alpha tocopherol    | 36.38040487 | 36.83996258 | -0.459557708 | 5500024024213121906563.F  | .H07.G08.E09.D10.B11.A12 |
| acetohexamide          | 37.17336593 | 37.63864853 | -0.465282602 | 5500024024213121906564.A  | .H07.G08.D10.B11.A12     |
| scopoletin             | 36.98993748 | 37.46016387 | -0.470226386 | 5500024030700072107987.C  | .H07.G08.E09.D10.B11.A12 |
| valproic acid          | 33.94793719 | 34.42118584 | -0.473248651 | 5500024030401071707292.G  | .H01.G02.E03.D04.B05.A06 |
| paclitaxel             | 34.9526173  | 35.4281341  | -0.475516796 | 612613111306.A08          | .H07.G08.E09.D10.B11.A12 |
| hydroxyachillin        | 34.54331938 | 35.01997127 | -0.476651892 | 5500024024213121906559.C  | .H01.G02.E03.D04.B05.A06 |
| memantine              | 34.22951189 | 34.70962788 | -0.480115995 | 5500024030760072207033.B  | .H01.G02.E03.D04.B05.A06 |
| gramine                | 34.53923521 | 35.01997127 | -0.480736059 | 5.50E+22                  | .H01.G02.E03.D04.B05.A06 |
| ambroxol               | 32.97592086 | 33.45797002 | -0.482049156 | 622623112706.A07          | .H07.G08.E09.D10.B11.A12 |
| chlorprothixene        | 36.52375139 | 37.00786033 | -0.484108942 | 5500024024213121906563.G  | .H01.G02.E03.D04.B05.A06 |
| cefalexin              | 36.51940747 | 37.00786033 | -0.488452857 | 5500024024213121906563.FI | .H01.G02.E03.D04.B05.A06 |
| trapidil               | 36.96949359 | 37.46016387 | -0.490670279 | 5500024030700072107987.C  | .H07.G08.E09.D10.B11.A12 |
| wortmannin             | 33.92661721 | 34.42118584 | -0.494568627 | 5500024030401071707292.A  | .H01.G02.E03.D04.B05.A06 |
| trichostatin A         | 37.14399211 | 37.63864853 | -0.494656417 | 5500024024213121906564.H  | .H07.G08.D10.B11.A12     |
| procainamide           | 36.50519985 | 37.00786033 | -0.50266048  | 5500024024213121906563.H  | .H01.G02.E03.D04.B05.A06 |
| tetracycline           | 34.23448643 | 34.74789333 | -0.513406898 | 614615111406.B03          | .H01.G02.E03.D04.B05.A06 |
| LY-294002              | 36.79636007 | 37.31290545 | -0.516545382 | 5500024035736031208612.D  | .G08.E09.D10.B11.A12     |
| Prestwick-860          | 33.68668442 | 34.21031976 | -0.52363534  | 5.50E+28                  | .H07.G08.E09.D10.B11.A12 |
| suprofen               | 33.60480655 | 34.13330462 | -0.528498063 | 5500024030760072207028.D  | .H01.G02.D04.B05.A06     |
| valproic acid          | 35.61074846 | 36.14209273 | -0.531344272 | 5500024017802120306174.G  | .H01.G02.E03.D04.B05.A06 |
| LY-294002              | 33.88785705 | 34.42118584 | -0.533328792 | 5500024030401071707292.B  | .H01.G02.E03.D04.B05.A06 |
| 15-delta prostaglandii | 33.88547671 | 34.42118584 | -0.535709127 | 5500024030401071707292.C  | .H01.G02.E03.D04.B05.A06 |
| procaine               | 37.08846715 | 37.63864853 | -0.550181378 | 5500024024213121906564.G  | .H07.G08.D10.B11.A12     |
| phenformin             | 32.90840197 | 33.45935203 | -0.550950059 | 5.50E+27                  | .H01.G02.E03.D04.B05.A06 |
| mesalazine             | 36.692977   | 37.24787327 | -0.554896276 | 5500024035736031208612.A  | .H01.G02.E03.D04.B05.A06 |
| diprophylline          | 37.07781462 | 37.63864853 | -0.56083391  | 5.50E+33                  | .H07.G08.D10.B11.A12     |
| laudanose              | 34.5467555  | 35.11129025 | -0.564534752 | 640641112706.C06          | .H01.G02.E03.D04.B05     |
| Trolox C               | 34.54310794 | 35.11129025 | -0.568182313 | 640641112706.D05          | .H01.G02.E03.D04.B05     |
| lansoprazole           | 33.60468108 | 34.17633596 | -0.571654879 | 5500024030760072207033.C  | .H07.G08.E09.B11.A12     |
| xylometazoline         | 34.52454533 | 35.10850208 | -0.583956747 | 6.15E+22                  | .H07.G08.E09.D10.B11.A12 |
| trogilozone            | 33.82891193 | 34.42118584 | -0.592273904 | 5500024030401071707292.C  | .H01.G02.E03.D04.B05.A06 |
| baclofen               | 34.82809146 | 35.4281341  | -0.600042637 | 612613111306.C12          | .H07.G08.E09.D10.B11.A12 |
| sotalol                | 34.10250401 | 34.70962788 | -0.60712387  | 5.50E+23                  | .H01.G02.E03.D04.B05.A06 |
| risperidone            | 33.56792066 | 34.17633596 | -0.608415299 | 5500024030760072207033.G  | .H07.G08.E09.B11.A12     |
| trimethobenzamide      | 34.65367669 | 35.2669347  | -0.613258011 | 612613111306.A03          | .H01.G02.E03.D04.B05.A06 |
| norcyclobenzaprine     | 34.51078749 | 35.13162255 | -0.620835062 | 5500024024214122006604.G  | .H07.G08.E09.D10.B11.A12 |
| cinocacin              | 33.77856269 | 34.40088765 | -0.622324954 | 5.50E+32                  | .H07.G08.E09.D10.B11     |
| oxamniquine            | 34.07257057 | 34.70962788 | -0.637057315 | 5500024030760072207033.D  | .H01.G02.E03.D04.B05.A06 |
| sulindac               | 36.99721672 | 37.63864853 | -0.641431806 | 5500024024213121906564.D  | .H07.G08.D10.B11.A12     |
| securinine             | 33.75354916 | 34.40088765 | -0.647338487 | 5500024030401071707292.C  | .H07.G08.E09.D10.B11     |
| acepromazine           | 34.43444908 | 35.08636713 | -0.651918046 | 640641112706.C08          | .H07.G08.E09.D10.B11.A12 |
| harmine                | 34.42943532 | 35.08636713 | -0.656931809 | 640641112706.G10          | .H07.G08.E09.D10.B11.A12 |
| ethosuximide           | 34.45075606 | 35.10850208 | -0.657746015 | 614615111406.C10          | .H07.G08.E09.D10.B11.A12 |
| chlorphenesin          | 34.44596803 | 35.10850208 | -0.662534049 | 614615111406.C09          | .H07.G08.E09.D10.B11.A12 |
| LY-294002              | 36.64945726 | 37.31290545 | -0.663448195 | 5500024035736031208612.B  | .G08.E09.D10.B11.A12     |
| protriptyline          | 36.79527889 | 37.46016387 | -0.664884983 | 5500024030700072107987.F  | .H07.G08.E09.D10.B11.A12 |
| valproic acid          | 35.46842782 | 36.14209273 | -0.673664911 | 5500024017802120306174.A  | .H01.G02.E03.D04.B05.A06 |
| flupentixol            | 36.33403983 | 37.00786033 | -0.673820502 | 5500024024213121906563.D  | .H01.G02.E03.D04.B05.A06 |
| captopril              | 34.58962303 | 35.2669347  | -0.677311679 | 612613111306.D06          | .H01.G02.E03.D04.B05.A06 |
| trichostatin A         | 34.05545584 | 34.74789333 | -0.692437487 | 614615111406.A02          | .H01.G02.E03.D04.B05.A06 |
| harmol                 | 34.41753298 | 35.11129025 | -0.693757266 | 640641112706.A05          | .H01.G02.E03.D04.B05     |
| paracetamol            | 33.51340966 | 34.21031976 | -0.696910099 | 5500024030760072207028.H  | .H07.G08.E09.D10.B11.A12 |
| 15-delta prostaglandii | 35.43906865 | 36.14209273 | -0.703024077 | 5500024017802120306174.C  | .H01.G02.E03.D04.B05.A06 |
| valproic acid          | 35.43804264 | 36.14209273 | -0.704050084 | 5500024017802120306174.FI | .H01.G02.E03.D04.B05.A06 |

|                       |             |             |              |                           |                          |
|-----------------------|-------------|-------------|--------------|---------------------------|--------------------------|
| mefenamic acid        | 36.93424583 | 37.63864853 | -0.704402703 | 5500024024213121906564.C  | .H07.G08.D10.B11.A12     |
| trichostatin A        | 36.53196366 | 37.24471367 | -0.712750013 | 5500024030700072107987.FI | .H01.G02.E03.D04.B05.A06 |
| ketoconazole          | 36.29077157 | 37.00786033 | -0.71708876  | 5500024024213121906563.D  | .H01.G02.E03.D04.B05.A06 |
| apramycin             | 33.96989456 | 34.70962788 | -0.739733323 | 5500024030760072207033.FI | .H01.G02.E03.D04.B05.A06 |
| amiodarone            | 34.3991054  | 35.15552717 | -0.756421771 | 5500024024214122006604.FI | .H01.G02.E03.D04.A06     |
| valproic acid         | 36.52329317 | 37.31290545 | -0.789612283 | 5500024035736031208612.FI | .G08.E09.D10.B11.A12     |
| LY-294002             | 33.62724215 | 34.42118584 | -0.793943682 | 5500024030401071707292.D  | .H01.G02.E03.D04.B05.A06 |
| azathioprine          | 34.60302041 | 35.4281341  | -0.825113691 | 612613111306.D09          | .H07.G08.E09.D10.B11.A12 |
| moroxydine            | 34.59662545 | 35.4281341  | -0.831508647 | 612613111306.D08          | .H07.G08.E09.D10.B11.A12 |
| ellipticine           | 34.25374815 | 35.08636713 | -0.832618974 | 640641112706.F12          | .H07.G08.E09.D10.B11.A12 |
| thiostrepton          | 34.29535691 | 35.13162255 | -0.836265649 | 5500024024214122006604.H  | .H07.G08.E09.D10.B11.A12 |
| sulfaphenazole        | 36.79940102 | 37.63864853 | -0.839247512 | 5500024024213121906564.H  | .H07.G08.D10.B11.A12     |
| pentetrazol           | 34.24705969 | 35.10850208 | -0.861442385 | 614615111406.H12          | .H07.G08.E09.D10.B11.A12 |
| 6-benzylaminopurine   | 32.59311787 | 33.45935203 | -0.866234155 | 5500024024213121906560.D  | .H01.G02.E03.D04.B05.A06 |
| N-acetyl-L-leucine    | 36.37466345 | 37.24471367 | -0.870050224 | 5.50E+27                  | .H01.G02.E03.D04.B05.A06 |
| oxolinic acid         | 34.22589914 | 35.10850208 | -0.882602933 | 614615111406.F12          | .H07.G08.E09.D10.B11.A12 |
| valproic acid         | 36.3909057  | 37.31290545 | -0.921999757 | 5500024035736031208612.A  | .G08.E09.D10.B11.A12     |
| dequalinium chloride  | 36.04453234 | 37.00786033 | -0.963327991 | 5500024024213121906563.FI | .H01.G02.E03.D04.B05.A06 |
| rosiglitazone         | 35.1615202  | 36.12983309 | -0.968312888 | EC2004032003AA            | EC2004032002AA           |
| etamivan              | 34.14048032 | 35.11129025 | -0.970809931 | 6.41E+17                  | .H01.G02.E03.D04.B05     |
| trichostatin A        | 33.44787813 | 34.42118584 | -0.973307707 | 5500024030401071707292.C  | .H01.G02.E03.D04.B05.A06 |
| morantel              | 36.66372349 | 37.63864853 | -0.97492504  | 5500024024213121906564.G  | .H07.G08.D10.B11.A12     |
| todralazine           | 36.65041631 | 37.63864853 | -0.988232219 | 5500024024213121906564.G  | .H07.G08.D10.B11.A12     |
| tolnaftate            | 34.26373984 | 35.2669347  | -1.003194866 | 612613111306.A02          | .H01.G02.E03.D04.B05.A06 |
| sodium phenylbutyrate | 35.6465771  | 36.67804214 | -1.031465036 | EC2004042305AA            | EC2004042302AA           |
| chrysin               | 36.42113217 | 37.46016387 | -1.039031699 | 5500024030700072107987.H  | .H07.G08.E09.D10.B11.A12 |
| hyoscyamine           | 34.03465862 | 35.10850208 | -1.073843455 | 6.15E+23                  | .H07.G08.E09.D10.B11.A12 |
| troglitazone          | 35.03613777 | 36.12983309 | -1.093695327 | EC2004032004AA            | EC2004032002AA           |
| verteporfin           | 36.15210901 | 37.24787327 | -1.095764266 | 5500024035736031208612.FI | .H01.G02.E03.D04.B05.A06 |
| propafenone           | 33.99580021 | 35.11129025 | -1.115490042 | 640641112706.F03          | .H01.G02.E03.D04.B05     |
| nifedipine            | 36.44715009 | 37.63864853 | -1.191498437 | 5500024024213121906564.D  | .H07.G08.D10.B11.A12     |
| solanine              | 33.75689601 | 35.01997127 | -1.263075263 | 5500024024213121906559.D  | .H01.G02.E03.D04.B05.A06 |
| parthenolide          | 33.80511904 | 35.11129025 | -1.306171207 | 640641112706.C01          | .H01.G02.E03.D04.B05     |
| vorinostat            | 33.09407401 | 34.42118584 | -1.327111825 | 5.50E+23                  | .H01.G02.E03.D04.B05.A06 |
| apigenin              | 35.5107929  | 36.83996258 | -1.329169676 | 5.50E+28                  | .H07.G08.E09.D10.B11.A12 |
| rofecoxib             | 34.74809467 | 36.12983309 | -1.381738421 | EC2004032005AA            | EC2004032002AA           |
| estradiol             | 34.78813617 | 36.19585457 | -1.4077184   | EC2004032010AA            | EC2004032009AA           |
| wortmannin            | 34.70389207 | 36.19585457 | -1.491962493 | EC2004032012AA            | EC2004032009AA           |
| tetraethylenepentamii | 35.09089966 | 36.67804214 | -1.587142485 | EC2004042306AA            | EC2004042302AA           |
| raxofifene            | 34.58157554 | 36.19585457 | -1.61427903  | EC2004032011AA            | EC2004032009AA           |
| clopamide             | 31.71959007 | 33.45797002 | -1.738379944 | 6.23E+22                  | .H07.G08.E09.D10.B11.A12 |
| dirithromycin         | 33.28705768 | 35.11129025 | -1.824232574 | 640641112706.H04          | .H01.G02.E03.D04.B05     |
| chlortetracycline     | 33.4197275  | 35.4281341  | -2.008406601 | 612613111306.A07          | .H07.G08.E09.D10.B11.A12 |
| ajmaline              | 32.97105775 | 35.11129025 | -2.140232496 | 640641112706.A04          | .H01.G02.E03.D04.B05     |
| trichostatin A        | 33.97743969 | 36.14209273 | -2.164653037 | 5500024017802120306174.C  | .H01.G02.E03.D04.B05.A06 |
| azacyclonol           | 33.22679593 | 35.4281341  | -2.201338173 | 612613111306.F12          | .H07.G08.E09.D10.B11.A12 |
| lobeline              | 32.87491587 | 35.08636713 | -2.211451256 | 6.41E+23                  | .H07.G08.E09.D10.B11.A12 |
| vorinostat            | 33.91319192 | 36.14209273 | -2.228900814 | 5.50E+23                  | .H01.G02.E03.D04.B05.A06 |
| glibenclamide         | 31.08342575 | 33.4530122  | -2.369586453 | 622623112706.H02          | .H01.G02.E03.B05.A06     |
| clindamycin           | 32.36273132 | 34.74789333 | -2.385162005 | 614615111406.F01          | .H01.G02.E03.D04.B05.A06 |
| chlorzoxazone         | 32.72003682 | 35.10850208 | -2.388465254 | 614615111406.F09          | .H07.G08.E09.D10.B11.A12 |
| valproic acid         | 34.27194979 | 36.67804214 | -2.406092354 | EC2004042303AA            | EC2004042302AA           |
| ampyrone              | 32.33060324 | 34.74789333 | -2.41729009  | 614615111406.A04          | .H01.G02.E03.D04.B05.A06 |
| trichostatin A        | 34.53995848 | 37.31290545 | -2.772946968 | 5500024035736031208612.C  | .G08.E09.D10.B11.A12     |
| piperlongumine        | 32.25981733 | 35.08636713 | -2.8265498   | 640641112706.F11          | .H07.G08.E09.D10.B11.A12 |
| danazol               | 32.54635143 | 35.4281341  | -2.881782672 | 612613111306.B08          | .H07.G08.E09.D10.B11.A12 |
| colforsin             | 32.06885637 | 35.03613777 | -2.9672814   | EC2005081605AA            | EC2005081602AA           |
| valproic acid         | 33.10374681 | 36.67804214 | -3.574295328 | EC2004042304AA            | EC2004042302AA           |
| estradiol             | 31.08260455 | 35.03613777 | -3.953533213 | EC2005081604AA            | EC2005081602AA           |
| vorinostat            | 33.34232906 | 37.31290545 | -3.970576396 | 5.50E+29                  | .G08.E09.D10.B11.A12     |
